# Supplementary material for: Genomic and clinical features of endoplasmic reticulum stress factor in digestive system pan-cancer studies
Source: Front Oncol. 2023 Jan 9;12:1072576. doi: 10.3389/fonc.2022.1072576 (PMC9868864; doi:10.3389/fonc.2022.1072576)
Supplement: Supplementary file 3 [file Table_3.xls]

## Sheet: TableS3 deg_res_ESCA_DEGs
gene	log2FC	pvalue	adjusted_pvalue
TPX2	4.03043	2.00574e-31	1.17498e-26
HOXC9	6.64553	7.62351e-31	2.23296e-26
UBE2C	4.19158	1.20596e-30	2.35487e-26
HOXC-AS1	7.28319	2.06472e-30	3.02383e-26
BIRC5	3.94879	6.04523e-30	7.08271e-26
CDC20	4.04952	1.37981e-29	1.34718e-25
NEK2	4.23421	2.30088e-29	1.92554e-25
TROAP	3.82739	4.63747e-29	3.39585e-25
CDC45	3.92032	7.51648e-29	4.89248e-25
CENPA	4.2715	1.30499e-28	7.64476e-25
KIFC1	3.61356	4.74581e-28	2.5274e-24
UBE2T	3.36475	7.57932e-28	3.6124e-24
NUF2	3.87328	8.01644e-28	3.6124e-24
NCAPH	3.7716	1.42914e-27	5.38567e-24
KIF2C	3.55772	1.46787e-27	5.38567e-24
EXO1	3.60149	1.56078e-27	5.38567e-24
PTTG1	3.64106	1.65943e-27	5.38567e-24
KIF18B	3.88706	1.71415e-27	5.38567e-24
BUB1	3.63803	1.74677e-27	5.38567e-24
MELK	3.65168	2.26588e-27	6.31091e-24
DLGAP5	3.78156	2.29403e-27	6.31091e-24
CEP55	3.74198	2.37005e-27	6.31091e-24
AURKB	3.93374	2.98496e-27	7.60268e-24
CDCA5	3.56979	6.2212e-27	1.51852e-23
CDK1	3.36961	8.34801e-27	1.95614e-23
ASPM	3.78441	9.10081e-27	2.05052e-23
CKS2	3.12078	1.25675e-26	2.72673e-23
RAD54L	3.1935	1.43746e-26	3.00742e-23
MYBL2	4.16335	1.50441e-26	3.03895e-23
BUB1B	3.46937	1.6397e-26	3.20183e-23
KIF14	3.80522	2.5667e-26	4.85031e-23
KIF23	3.1438	2.86901e-26	5.25216e-23
MIR4435-2HG	3.01467	4.33542e-26	7.69616e-23
ASF1B	3.4228	4.58566e-26	7.90095e-23
MAD2L1	3.08655	4.8082e-26	8.04769e-23
HOXC8	5.82119	5.60347e-26	9.11825e-23
KIF18A	3.42824	6.53596e-26	1.03482e-22
CDKN3	3.4144	7.85879e-26	1.20023e-22
CLSPN	3.1769	7.99049e-26	1.20023e-22
KIAA0101	3.62961	1.12628e-25	1.61036e-22
GTSE1	3.37569	1.12707e-25	1.61036e-22
RECQL4	3.1937	1.84612e-25	2.57494e-22
KIF4A	3.65713	2.54719e-25	3.43257e-22
NUSAP1	3.5248	2.5782e-25	3.43257e-22
KIF11	3.11668	2.68286e-25	3.49254e-22
CENPM	3.28105	2.75423e-25	3.50752e-22
CDCA3	3.42646	3.43297e-25	4.27887e-22
CDCA2	3.43236	4.14407e-25	5.05758e-22
CKAP2L	3.50492	4.4188e-25	5.28281e-22
FAM49B	2.04006	4.99269e-25	5.84954e-22
BLM	2.96758	5.8496e-25	6.71913e-22
CENPF	3.53414	6.91174e-25	7.78647e-22
PBK	3.61727	7.39639e-25	8.17525e-22
MCM10	3.66263	1.04514e-24	1.1338e-21
PKMYT1	3.67361	1.10615e-24	1.17043e-21
WDR62	3.20115	1.11886e-24	1.17043e-21
MTFR2	3.26917	1.22886e-24	1.26295e-21
DDX39A	1.95914	1.33409e-24	1.34745e-21
PLK1	3.24445	1.49282e-24	1.48221e-21
CCNB1	3.23755	1.55141e-24	1.51472e-21
C17orf53	3.23662	1.58521e-24	1.52235e-21
CDC25C	3.40176	2.49594e-24	2.35831e-21
CCNB2	3.68069	2.56434e-24	2.38447e-21
SHCBP1	3.13367	2.8574e-24	2.61546e-21
ORC1	3.46813	2.92376e-24	2.63503e-21
UHRF1	3.35806	3.68237e-24	3.26844e-21
HOXC-AS2	5.66988	3.93718e-24	3.44245e-21
SKA3	3.41229	4.08795e-24	3.52171e-21
CDCA8	3.116	4.66437e-24	3.96005e-21
KIF20A	3.62216	5.14092e-24	4.30229e-21
HJURP	3.68454	6.79949e-24	5.61016e-21
RAD51AP1	3.20144	8.82066e-24	7.17671e-21
DEPDC1	3.45286	9.56769e-24	7.67787e-21
CCNA2	3.11531	1.14523e-23	9.06607e-21
NCAPG	3.18126	1.32695e-23	1.03646e-20
FOXM1	3.44696	2.00136e-23	1.54266e-20
MKI67	3.48391	2.18507e-23	1.6513e-20
SPC25	2.9874	2.19869e-23	1.6513e-20
POLQ	3.52565	2.51704e-23	1.86646e-20
ORC6	2.90394	2.81658e-23	2.06248e-20
PRC1	2.85233	3.16174e-23	2.2791e-20
SGOL1	3.12347	3.19022e-23	2.2791e-20
GINS1	3.1275	3.3565e-23	2.369e-20
AURKA	3.05366	3.52134e-23	2.45576e-20
DDIAS	3.35517	3.62927e-23	2.50125e-20
MRGBP	1.95657	4.45442e-23	3.01911e-20
CKS1B	2.5498	4.48375e-23	3.01911e-20
RAD51	3.24483	4.72195e-23	3.14337e-20
TOP2A	3.93721	6.35192e-23	4.18092e-20
UBE2S	2.70616	6.42974e-23	4.18512e-20
HNRNPC	1.3292	8.23362e-23	5.30037e-20
C1orf112	2.22968	1.29384e-22	8.23853e-20
CKAP2	2.82763	1.32673e-22	8.35708e-20
FANCA	2.65227	1.34299e-22	8.36956e-20
PRR11	3.30132	1.55423e-22	9.49455e-20
EME1	2.59523	1.55593e-22	9.49455e-20
IQGAP3	3.36638	1.67856e-22	1.01373e-19
DEPDC1B	3.27949	1.70636e-22	1.02e-19
KPNA2	2.54548	1.72891e-22	1.02304e-19
TIMELESS	2.43832	1.9644e-22	1.15077e-19
LINC00152	2.69451	2.05545e-22	1.19218e-19
SRSF2	1.38945	2.1248e-22	1.22032e-19
PLK4	2.81398	2.14823e-22	1.2218e-19
RNASEH2A	2.5079	2.40561e-22	1.35503e-19
CENPK	2.78781	2.52949e-22	1.41124e-19
SNRPG	1.86818	2.71279e-22	1.49922e-19
GSG2	2.99906	3.13419e-22	1.71592e-19
ECT2	3.05747	3.33008e-22	1.80629e-19
SPC24	2.82758	3.68716e-22	1.98163e-19
PARPBP	2.7938	4.5917e-22	2.42981e-19
OIP5	3.3625	4.60404e-22	2.42981e-19
CTD-2510F5.4	4.33476	6.17703e-22	3.23086e-19
NUDT1	2.59044	6.83071e-22	3.54115e-19
TBC1D31	2.25326	7.02075e-22	3.60774e-19
TK1	3.08951	8.10203e-22	4.12717e-19
NDC80	3.3517	1.1222e-21	5.6672e-19
EZH2	2.42554	1.27608e-21	6.35616e-19
CENPW	3.0251	1.28032e-21	6.35616e-19
NME1	2.3413	1.32312e-21	6.51344e-19
AC133644.2	3.83841	1.50827e-21	7.36299e-19
RRM2	3.42831	1.56603e-21	7.58179e-19
HMMR	3.31943	1.5954e-21	7.62872e-19
DTL	3.4592	1.60177e-21	7.62872e-19
CDT1	3.30971	1.72432e-21	8.14617e-19
SKA1	3.13761	1.80522e-21	8.40195e-19
TRIP13	3.41655	1.80715e-21	8.40195e-19
ADRM1	1.59895	1.85957e-21	8.57758e-19
SGOL2	2.63109	1.97356e-21	9.03228e-19
E2F7	3.94457	2.14036e-21	9.71973e-19
CDC6	3.69182	2.42419e-21	1.0924e-18
ALYREF	1.81124	2.45263e-21	1.09678e-18
PSMA7	1.57702	2.48554e-21	1.10307e-18
STIL	2.95893	2.76231e-21	1.21668e-18
WDHD1	2.7086	3.2549e-21	1.42295e-18
MND1	2.96818	3.98611e-21	1.72971e-18
CCNF	2.58167	4.34658e-21	1.87226e-18
FANCI	2.63003	4.42207e-21	1.89087e-18
CENPI	3.01043	6.41861e-21	2.72305e-18
PSMB2	1.59816	6.46122e-21	2.72305e-18
SNRPB	1.9351	6.59024e-21	2.75759e-18
HNRNPL	1.19925	6.73046e-21	2.79629e-18
ARHGAP11A	2.80938	6.82448e-21	2.81539e-18
HOXC11	6.61075	7.40575e-21	3.03382e-18
TTK	2.8792	7.56498e-21	3.07753e-18
PCNA	2.33584	7.64666e-21	3.0893e-18
C16orf59	3.02248	1.13342e-20	4.54775e-18
KIF22	1.97837	1.22642e-20	4.88739e-18
CASC5	3.08988	1.30792e-20	5.17698e-18
EFTUD2	1.54245	1.35589e-20	5.33083e-18
ERH	1.55821	1.38568e-20	5.41164e-18
CHEK2	2.15769	1.59624e-20	6.19265e-18
SF3B4	1.52932	1.62306e-20	6.25529e-18
PFDN2	1.94092	1.85685e-20	7.10955e-18
HOXB7	4.12168	1.934e-20	7.35685e-18
FAM72D	3.35103	2.51153e-20	9.49211e-18
MAGOH	1.63371	2.56594e-20	9.6356e-18
ERCC6L	2.89022	2.68337e-20	1.00124e-17
CHEK1	2.59947	2.73239e-20	1.01308e-17
FANCB	2.71122	3.09468e-20	1.14019e-17
HIST1H1D	6.1455	3.32067e-20	1.2158e-17
RCC1	2.23662	3.89267e-20	1.41637e-17
HOXC6	4.56304	4.29212e-20	1.55208e-17
TICRR	3.26492	4.52932e-20	1.6278e-17
KIF15	2.74323	4.61065e-20	1.64693e-17
SPAG5	2.97629	5.52617e-20	1.96199e-17
POLE2	2.4215	5.658e-20	1.99669e-17
RAET1K	4.1894	6.19527e-20	2.1732e-17
ULBP2	5.35251	6.32692e-20	2.20618e-17
HOXC10	6.72965	7.42135e-20	2.56906e-17
EIF4A3	1.6803	7.45533e-20	2.56906e-17
LSM12	1.40125	8.02236e-20	2.74829e-17
RCC2	2.11386	9.80181e-20	3.33837e-17
NUP62	1.45486	1.00921e-19	3.41738e-17
AC012531.25	5.27789	1.05659e-19	3.55726e-17
ANLN	3.31743	1.20775e-19	4.04293e-17
CENPE	2.78324	1.24305e-19	4.13746e-17
HDGF	1.69817	1.3885e-19	4.59547e-17
ZNF207	1.12161	1.46404e-19	4.81826e-17
MTBP	2.38256	1.55317e-19	5.08305e-17
FAM64A	3.47551	1.82495e-19	5.92161e-17
LAMP3	4.10936	1.83305e-19	5.92161e-17
CENPU	2.59632	1.83973e-19	5.92161e-17
IBSP	7.16226	1.96586e-19	6.29301e-17
PSMA4	1.46244	2.00444e-19	6.38165e-17
RBM8A	1.51821	2.09723e-19	6.64097e-17
GINS2	3.05939	2.15659e-19	6.79221e-17
RP5-1125M8.2	-4.28376	2.34862e-19	7.35747e-17
UTP18	1.4945	2.76842e-19	8.62643e-17
ARHGAP11B	2.3762	2.85274e-19	8.84214e-17
HN1	2.4441	2.91824e-19	8.99754e-17
BCL2L12	2.03741	3.28668e-19	1.00805e-16
FUS	1.43225	3.50832e-19	1.07042e-16
POLD1	1.96274	3.65964e-19	1.1108e-16
PPIA	1.73659	3.8598e-19	1.16552e-16
CDC25B	2.88563	4.05051e-19	1.21684e-16
SCNM1	1.4825	4.1959e-19	1.25408e-16
SNHG1	1.84835	4.25606e-19	1.2656e-16
TMEM41A	1.49547	4.84146e-19	1.43241e-16
BAX	1.6324	5.04879e-19	1.48625e-16
BUB3	1.43679	5.46025e-19	1.59934e-16
LIG1	2.0084	5.67891e-19	1.65511e-16
CENPN	2.35658	5.86828e-19	1.70183e-16
HNRNPA2B1	1.28314	6.26998e-19	1.80937e-16
PSMD14	1.47576	6.33496e-19	1.81568e-16
F12	3.75808	6.35383e-19	1.81568e-16
TRIM59	2.48316	7.15635e-19	2.03508e-16
FEN1	2.26174	7.363e-19	2.08373e-16
RELT	2.33957	7.41172e-19	2.08743e-16
PRKD2	1.26384	7.58078e-19	2.12483e-16
PRIM2	1.87311	7.67775e-19	2.14176e-16
TFAP2A-AS1	4.25808	7.75185e-19	2.15219e-16
CDCA4	2.5353	7.81463e-19	2.15938e-16
BRIP1	2.70816	8.01156e-19	2.2034e-16
RFC3	2.27191	1.20579e-18	3.30076e-16
PTBP1	1.34878	1.22468e-18	3.33689e-16
AUNIP	2.68969	1.23811e-18	3.35786e-16
DKC1	1.74697	1.32848e-18	3.58635e-16
HELLS	2.26463	1.38818e-18	3.73032e-16
CBX3	1.76842	1.47791e-18	3.95331e-16
XRCC2	2.96465	1.50022e-18	3.99474e-16
DCAF15	1.52006	1.54401e-18	4.09275e-16
FAM111B	3.0726	1.58315e-18	4.17758e-16
HIST1H2BH	4.83086	1.67238e-18	4.39326e-16
RAN	1.67523	1.69317e-18	4.42801e-16
SNRPD1	1.88544	1.71846e-18	4.47418e-16
HMGB3	2.83302	1.77482e-18	4.59159e-16
PSMA3	1.41017	1.77923e-18	4.59159e-16
PSMD11	1.68126	1.82385e-18	4.68609e-16
ESM1	4.7749	1.94968e-18	4.98751e-16
PFDN4	1.80415	1.97795e-18	5.03784e-16
SNRPGP10	1.79717	2.10572e-18	5.34006e-16
UBE2SP1	2.91334	2.18631e-18	5.49904e-16
CBFB	1.7064	2.18719e-18	5.49904e-16
LMNB1	2.56222	2.22562e-18	5.57176e-16
TRMT6	1.65443	2.26269e-18	5.64045e-16
TMC6	2.02811	2.34952e-18	5.83208e-16
NEIL3	3.66097	2.39307e-18	5.91511e-16
DHX9	1.23294	2.42717e-18	5.97419e-16
RALY	1.26793	2.44702e-18	5.99785e-16
KIAA1524	2.71501	2.72321e-18	6.64701e-16
TXNDC9	1.30804	2.91726e-18	7.09111e-16
HNRNPM	0.994288	3.00389e-18	7.27152e-16
TACC3	2.5057	3.02383e-18	7.28966e-16
DTYMK	1.93737	3.30799e-18	7.94202e-16
FAM72A	2.53264	3.82654e-18	9.14949e-16
RACGAP1	2.21102	3.88931e-18	9.26177e-16
FAM72C	3.93814	4.20413e-18	9.94666e-16
KNTC1	2.24887	4.21087e-18	9.94666e-16
ARPC5	1.29723	4.32204e-18	1.01683e-15
NRM	2.30556	4.64312e-18	1.08799e-15
E2F1	2.32449	4.84735e-18	1.13132e-15
RAE1	1.59457	5.17629e-18	1.2033e-15
TUBB	1.81388	5.28063e-18	1.22271e-15
HIST2H2BC	3.64607	5.37236e-18	1.23905e-15
PRR7	2.84879	5.79969e-18	1.33236e-15
DCAF12L1	-5.06051	6.09993e-18	1.39586e-15
LINC00337	4.03409	6.69247e-18	1.52549e-15
RUVBL1	2.01374	6.75111e-18	1.5329e-15
MCM2	2.93065	6.80545e-18	1.53927e-15
DGUOK	1.46144	7.01285e-18	1.58008e-15
TRAIP	2.30183	7.3289e-18	1.64496e-15
SF3B6	1.45389	7.41262e-18	1.6574e-15
CENPO	2.03632	7.45111e-18	1.65967e-15
PPM1G	1.36995	8.0141e-18	1.77831e-15
AC017002.1	3.96253	8.48232e-18	1.87511e-15
BRCA2	2.64463	8.84412e-18	1.94773e-15
DNMT1	1.82017	9.16999e-18	2.00929e-15
MPLKIP	1.55665	9.19221e-18	2.00929e-15
ESPL1	3.09316	9.56472e-18	2.08294e-15
C8orf76	1.59268	9.96204e-18	2.16143e-15
TDO2	4.0456	1.07397e-17	2.31711e-15
ILF2	1.53721	1.07587e-17	2.31711e-15
HIST2H2AC	3.4652	1.08548e-17	2.32362e-15
EBNA1BP2	1.45046	1.08682e-17	2.32362e-15
ZWILCH	1.98798	1.1159e-17	2.37711e-15
YIF1B	1.6874	1.13229e-17	2.40328e-15
MED6	1.2098	1.18937e-17	2.51532e-15
TMEM206	2.08636	1.23769e-17	2.60586e-15
DSCC1	2.31188	1.24108e-17	2.60586e-15
PTGES3	1.37999	1.25486e-17	2.62538e-15
RHBDF2	2.08132	1.26589e-17	2.63904e-15
CDCA7	3.2423	1.31901e-17	2.73667e-15
ZWINT	2.51978	1.32207e-17	2.73667e-15
FAM110A	2.27479	1.40294e-17	2.89385e-15
CCDC137	1.49093	1.41756e-17	2.91376e-15
FAM72B	2.90228	1.46622e-17	3.00302e-15
DCAF13	1.67449	1.47124e-17	3.00302e-15
PUS1	1.58191	1.49986e-17	3.05081e-15
STMN1	2.55414	1.70942e-17	3.46503e-15
RMI2	2.8202	1.85588e-17	3.74893e-15
TYMS	2.60525	1.88935e-17	3.80344e-15
AC008991.1	-3.0574	1.93433e-17	3.88066e-15
NUP37	1.83811	1.95103e-17	3.90079e-15
MTHFD1L	2.05797	1.97718e-17	3.93963e-15
UTP6	1.26671	2.05233e-17	4.07552e-15
NSUN5	1.6084	2.38265e-17	4.71546e-15
CBX4	1.58922	2.39901e-17	4.73186e-15
CHTF18	2.13164	2.50098e-17	4.90256e-15
RBL1	2.14676	2.50229e-17	4.90256e-15
BID	2.11704	2.58109e-17	5.0401e-15
GABRD	3.71931	2.67953e-17	5.21493e-15
DHX34	1.41301	2.69491e-17	5.2275e-15
BRIX1	1.87277	2.96714e-17	5.73658e-15
E2F2	2.96434	2.99226e-17	5.76611e-15
CHAF1A	1.78621	3.01881e-17	5.79819e-15
POC1A	2.28688	3.1659e-17	6.06083e-15
ALG3	1.87785	3.35971e-17	6.41092e-15
YDJC	1.8627	3.40791e-17	6.48177e-15
RP11-245D16.4	3.92366	3.6104e-17	6.84468e-15
MORC2	1.32437	3.79684e-17	7.17493e-15
BORA	2.11	3.92887e-17	7.40056e-15
NXT1	1.55169	4.08169e-17	7.66377e-15
HNRNPA3	1.41694	4.17411e-17	7.81225e-15
RP11-493L12.6	6.46622	4.20575e-17	7.8464e-15
DSN1	1.87717	4.33602e-17	8.06375e-15
LY6E	2.86423	4.38571e-17	8.13036e-15
DBF4	2.20755	4.48751e-17	8.29283e-15
RFC4	2.35565	4.53079e-17	8.34648e-15
AC021224.1	4.01084	4.88271e-17	8.96658e-15
HIST1H2AI	5.42649	4.97536e-17	9.10817e-15
CCDC150	2.60631	5.02019e-17	9.13369e-15
PPP1R9B	1.27656	5.02048e-17	9.13369e-15
DENR	1.23872	5.73368e-17	1.03989e-14
CNIH4	1.55129	5.80173e-17	1.04898e-14
LRP8	3.39039	6.81079e-17	1.22764e-14
DNAJC9	1.65217	6.84713e-17	1.22764e-14
CENPH	2.28901	6.8527e-17	1.22764e-14
ACTL6A	1.94772	7.23784e-17	1.29268e-14
CCDC167	1.65825	7.40787e-17	1.31903e-14
RPAP3	1.39936	8.23223e-17	1.46137e-14
MRPL9	1.44027	8.67957e-17	1.53613e-14
MMS22L	1.96754	8.73021e-17	1.54043e-14
APOC4-APOC2	5.19418	8.92806e-17	1.57062e-14
TONSL	2.36469	9.33642e-17	1.63754e-14
PRCC	1.25008	9.37545e-17	1.63947e-14
SHKBP1	1.39417	9.66306e-17	1.68474e-14
BRCA1	2.29371	9.76879e-17	1.69812e-14
CENPL	1.83994	9.84293e-17	1.70594e-14
ARPC3	1.27291	9.95673e-17	1.72058e-14
GPN1	1.1757	1.01719e-16	1.75258e-14
PSMA6	1.49384	1.09114e-16	1.87449e-14
CSE1L	1.65637	1.12964e-16	1.93057e-14
CKLF	2.08283	1.13038e-16	1.93057e-14
ATXN2L	1.27285	1.13812e-16	1.93814e-14
TIAL1	0.950296	1.15316e-16	1.95807e-14
SNRPD2	1.53618	1.20086e-16	2.02808e-14
FLAD1	1.47951	1.20131e-16	2.02808e-14
PRMT1	1.5505	1.20681e-16	2.03149e-14
SF3A2	1.39235	1.24678e-16	2.09277e-14
SNRPA	1.39305	1.26055e-16	2.10984e-14
ACYP1	1.6834	1.2984e-16	2.16699e-14
ANP32E	1.84391	1.32982e-16	2.21314e-14
HOXA10	4.94671	1.34361e-16	2.22975e-14
CRLF3	1.42052	1.35981e-16	2.25025e-14
KHDRBS1	1.03385	1.36883e-16	2.2588e-14
PSMC4	1.42661	1.39235e-16	2.29117e-14
DNA2	2.34021	1.40248e-16	2.30136e-14
PSMG3	1.70008	1.46758e-16	2.40146e-14
PRPF40A	1.13195	1.50388e-16	2.45401e-14
PHF5A	1.31256	1.62739e-16	2.64818e-14
PIGU	1.51925	1.65648e-16	2.68804e-14
SPDL1	1.8361	1.69498e-16	2.74291e-14
TEAD4	2.13099	1.765e-16	2.84837e-14
TXNDC12	1.24183	1.80953e-16	2.9122e-14
ELAVL1	1.06501	1.84871e-16	2.9671e-14
MRPL47	1.62306	1.86454e-16	2.98433e-14
CPSF3	1.46016	1.88701e-16	3.01206e-14
CMSS1	2.00361	1.94193e-16	3.09131e-14
SUMO2	1.23624	1.95982e-16	3.11133e-14
CLDN7	4.28201	2.04339e-16	3.23523e-14
RANBP1	1.841	2.14934e-16	3.39381e-14
SNRPC	1.5063	2.15603e-16	3.39523e-14
FOXS1	3.11625	2.1661e-16	3.40194e-14
ECE2	2.13721	2.19018e-16	3.43055e-14
CCT3	1.42542	2.19677e-16	3.4317e-14
ZNF668	1.16433	2.20673e-16	3.43809e-14
DNAJB11	1.34007	2.24337e-16	3.48591e-14
DCLRE1B	1.7567	2.28853e-16	3.54668e-14
SAPCD2	3.04582	2.34893e-16	3.63067e-14
RP11-360L9.7	3.60769	2.43921e-16	3.7603e-14
TUBA1B	1.69577	2.45864e-16	3.77367e-14
MMP12	5.21236	2.46076e-16	3.77367e-14
GPRIN1	2.82785	2.50023e-16	3.82417e-14
DLEU2	2.38352	2.54398e-16	3.88095e-14
FKBP1A	1.24885	2.69642e-16	4.10284e-14
CCT5	1.82183	2.75491e-16	4.18097e-14
NUDCD1	1.69812	2.79179e-16	4.22599e-14
CD3EAP	2.20477	2.92544e-16	4.41689e-14
CCT7	1.25945	2.98755e-16	4.49907e-14
BCAP31	1.37228	3.00835e-16	4.51877e-14
MCM4	2.53468	3.04084e-16	4.5559e-14
GRINA	1.6462	3.06809e-16	4.585e-14
MIS18A	1.92592	3.09133e-16	4.60797e-14
STX6	1.52833	3.2158e-16	4.78134e-14
HNRNPR	1.21131	3.22738e-16	4.78424e-14
PSMB4	1.33165	3.23408e-16	4.78424e-14
AC002116.7	2.64519	3.25722e-16	4.80633e-14
RPA3	1.85796	3.27379e-16	4.81864e-14
LSM7	1.54719	3.45748e-16	5.07625e-14
NIFK	1.58517	3.50989e-16	5.14033e-14
THOP1	1.54817	3.57229e-16	5.21866e-14
TPM3	1.27556	3.62808e-16	5.28698e-14
EIF3B	1.397	3.65812e-16	5.31025e-14
HGS	1.21371	3.66218e-16	5.31025e-14
GGCT	1.74341	3.69387e-16	5.33807e-14
MCM7	2.30222	3.69959e-16	5.33807e-14
HIST1H2BF	4.7879	3.79175e-16	5.45761e-14
CHAF1B	2.2839	3.81148e-16	5.47256e-14
UBE2A	1.26191	3.86023e-16	5.52901e-14
CTHRC1	3.91161	3.88862e-16	5.55608e-14
XPO1	1.48157	3.94197e-16	5.6186e-14
NUP85	1.40129	4.12989e-16	5.87216e-14
SRRT	1.31926	4.26886e-16	6.05506e-14
TOMM40	1.71866	4.31556e-16	6.10651e-14
XPO6	1.19375	4.34387e-16	6.13177e-14
KCTD5	1.36615	4.41442e-16	6.21637e-14
NOP56	1.65267	4.44636e-16	6.24633e-14
SNRPA1	1.50556	4.83809e-16	6.78039e-14
ATAD5	2.19266	4.87478e-16	6.8155e-14
DPM1	1.26086	5.24913e-16	7.32141e-14
SNRPE	1.5342	5.33319e-16	7.42099e-14
MZT1	1.72751	6.12825e-16	8.50708e-14
USP39	1.21432	6.14322e-16	8.5077e-14
RP11-424C20.2	3.41768	6.24322e-16	8.62581e-14
LMNB2	2.09607	6.31577e-16	8.70551e-14
CHRNA1	4.71759	6.47467e-16	8.90359e-14
WDR75	1.19708	6.57698e-16	9.0231e-14
ABRACL	1.90077	6.68081e-16	9.14412e-14
FAM132B	3.42917	6.70903e-16	9.16134e-14
PALB2	1.51263	6.84643e-16	9.32722e-14
GINS4	2.60736	6.93585e-16	9.42629e-14
TMEM138	1.3919	6.95133e-16	9.42629e-14
C17orf49	1.67468	6.98255e-16	9.44676e-14
UCK2	1.53399	7.10573e-16	9.59126e-14
TIPRL	1.17899	7.15224e-16	9.63185e-14
NR2C2AP	1.54651	7.86836e-16	1.05719e-13
AP2S1	1.43537	8.07514e-16	1.08249e-13
RTKN	1.83828	8.18663e-16	1.09493e-13
MDFI	3.19156	8.98954e-16	1.19958e-13
SPNS1	1.25498	9.16134e-16	1.21973e-13
HAUS8	1.62684	9.72534e-16	1.29188e-13
LRR1	1.57429	9.79828e-16	1.29863e-13
UBE2I	1.25261	9.96678e-16	1.31798e-13
PMS2P1	1.64159	1.01831e-15	1.34355e-13
UBE2D1	1.39534	1.03349e-15	1.36052e-13
NUP205	1.52032	1.07587e-15	1.41313e-13
ATXN7L3	1.15793	1.0901e-15	1.42861e-13
TSSC1	1.49656	1.10464e-15	1.44444e-13
SH2D2A	2.47593	1.11966e-15	1.46082e-13
MASTL	1.82261	1.12443e-15	1.46216e-13
GTF2F2	1.43515	1.12568e-15	1.46216e-13
SNRPF	1.7327	1.15671e-15	1.49915e-13
RP11-354K4.2	-2.95011	1.17827e-15	1.52372e-13
PAICS	1.84483	1.18335e-15	1.52691e-13
FAAP24	2.05314	1.19487e-15	1.53839e-13
LRFN4	2.39172	1.2034e-15	1.54597e-13
H2AFX	2.06574	1.25526e-15	1.60907e-13
BOP1	1.95964	1.3302e-15	1.7014e-13
DAXX	1.11707	1.35761e-15	1.73269e-13
KIF20B	2.10505	1.36411e-15	1.73719e-13
PPIH	1.57197	1.45291e-15	1.84627e-13
DDX31	1.2923	1.52774e-15	1.93715e-13
PES1	1.20691	1.56335e-15	1.97711e-13
RUVBL2	1.45184	1.566e-15	1.97711e-13
TCEB1	1.25842	1.61249e-15	2.03143e-13
PNPT1	1.62058	1.71364e-15	2.15266e-13
THADA	1.02493	1.71608e-15	2.15266e-13
GABPB1	1.14521	1.73451e-15	2.1639e-13
PDILT	-6.43692	1.73591e-15	2.1639e-13
TRMU	1.32985	1.73611e-15	2.1639e-13
RGS19	1.97428	1.77862e-15	2.21217e-13
CPSF6	1.21335	1.80213e-15	2.23666e-13
DIABLO	1.15573	1.81e-15	2.24168e-13
PIF1	2.40085	1.86405e-15	2.30375e-13
NME1-NME2	1.4963	1.88215e-15	2.32123e-13
DUSP11	1.26089	1.90294e-15	2.34194e-13
WRAP53	1.52483	1.91287e-15	2.34922e-13
MTERF3	1.58228	1.93511e-15	2.37156e-13
KRR1	1.27943	1.96767e-15	2.40643e-13
RHEBL1	2.5887	1.97881e-15	2.41501e-13
RBM45	1.02283	2.01728e-15	2.45685e-13
ZC3H3	1.35123	2.07605e-15	2.52318e-13
VBP1	1.35238	2.08386e-15	2.52742e-13
SNX10	2.92239	2.16259e-15	2.61749e-13
SMNDC1	1.01563	2.20606e-15	2.66461e-13
INTS7	1.52212	2.23878e-15	2.69857e-13
FBXO5	1.852	2.26707e-15	2.72704e-13
WDR12	1.64861	2.28535e-15	2.74341e-13
HIST1H2BO	5.18956	2.29893e-15	2.75407e-13
OTX1	3.52631	2.35945e-15	2.82079e-13
CDC7	2.21525	2.36844e-15	2.82578e-13
NELFCD	1.51886	2.44175e-15	2.90732e-13
MRPL13	1.42097	2.47282e-15	2.93834e-13
TAP2	2.07898	2.50598e-15	2.97172e-13
POU2F1	1.30145	2.51645e-15	2.97811e-13
RFWD3	1.63076	2.53308e-15	2.99174e-13
KAT2A	1.48456	2.60065e-15	3.06537e-13
SNRNP70	0.888947	2.60853e-15	3.06848e-13
G3BP1	1.27576	2.61749e-15	3.07285e-13
PFN1	1.38958	2.65456e-15	3.11013e-13
DDX27	1.3815	2.69238e-15	3.14815e-13
CTD-2297D10.1	-3.40052	2.73034e-15	3.18617e-13
TCF19	1.92065	2.90176e-15	3.37948e-13
NVL	1.20656	3.04504e-15	3.53931e-13
PPIL1	1.49972	3.05192e-15	3.54029e-13
RABEPK	1.37094	3.1187e-15	3.61061e-13
NUP107	1.79148	3.18694e-15	3.67956e-13
H3F3B	1.48807	3.19082e-15	3.67956e-13
EIF2S2	1.17934	3.22969e-15	3.71706e-13
AIMP2	1.67841	3.24586e-15	3.72835e-13
SNRPD3	1.37545	3.41332e-15	3.90933e-13
GNB1L	1.78939	3.41677e-15	3.90933e-13
PSMA5	1.27963	3.52653e-15	4.02705e-13
NAA10	1.25838	3.53896e-15	4.02858e-13
BRMS1	1.4649	3.54274e-15	4.02858e-13
NOP2	1.56505	3.54851e-15	4.02858e-13
FTSJ1	1.38781	3.56113e-15	4.0351e-13
TTYH3	2.41483	3.57122e-15	4.03872e-13
KRI1	1.36736	3.6896e-15	4.16456e-13
FANCG	1.63491	3.7346e-15	4.20725e-13
RP11-796E10.1	5.5328	3.90089e-15	4.38614e-13
PSME2	1.75778	3.94247e-15	4.4244e-13
NMI	1.76822	4.00698e-15	4.4882e-13
DRD5P1	-5.97597	4.04945e-15	4.52712e-13
TMEM191A	2.56301	4.10444e-15	4.57985e-13
ATP5G1P4	4.54355	4.12869e-15	4.59815e-13
DDX12P	2.26822	4.26963e-15	4.74329e-13
SNW1	1.03796	4.27521e-15	4.74329e-13
IPO9	1.3548	4.28593e-15	4.7462e-13
UBAP2L	1.10443	4.30015e-15	4.75296e-13
MOB1A	1.07248	4.52083e-15	4.98747e-13
ATAD2	2.07333	4.62112e-15	5.08853e-13
PSMB3	1.81316	4.80335e-15	5.27927e-13
CHIA	-8.40615	4.89113e-15	5.36568e-13
ULBP1	4.45105	5.09867e-15	5.5829e-13
LINC01272	2.81048	5.14778e-15	5.62616e-13
PRIM1	1.99134	5.19676e-15	5.66912e-13
SET	1.33836	5.26925e-15	5.73751e-13
SRSF9	1.13501	5.5376e-15	6.01851e-13
SRSF3	1.03713	5.55794e-15	6.02944e-13
PYCARD	2.3508	5.65629e-15	6.12479e-13
PCGF1	1.26717	5.67481e-15	6.13351e-13
POLR2H	1.51533	5.92356e-15	6.39058e-13
HIST1H2BG	3.68328	6.00643e-15	6.46807e-13
RUSC1	1.3022	6.09151e-15	6.54765e-13
NCAPG2	2.22546	6.17095e-15	6.62088e-13
AATF	1.24099	6.24747e-15	6.69073e-13
EXOSC5	1.64493	6.27922e-15	6.71247e-13
PSMD13	1.18543	6.41761e-15	6.84791e-13
PPP1R35	1.80607	6.52368e-15	6.94843e-13
C5orf34	2.36369	6.59056e-15	7.00693e-13
PA2G4	1.41234	6.69487e-15	7.10493e-13
TNFRSF25	2.21275	6.87841e-15	7.28651e-13
YARS2	1.45803	7.08046e-15	7.48701e-13
CCT4	1.32424	7.14778e-15	7.54458e-13
FANCD2	2.2831	7.17674e-15	7.56153e-13
DCLK3	3.31396	7.31467e-15	7.69301e-13
C2orf48	3.61825	7.81944e-15	8.20915e-13
CFL1	1.31323	7.92525e-15	8.29715e-13
ZNF267	1.52918	7.93158e-15	8.29715e-13
TAF2	1.30047	7.9643e-15	8.31652e-13
SLC52A2	1.75956	8.04768e-15	8.38863e-13
CDK2	1.67859	8.11178e-15	8.44043e-13
RP11-345J4.5	1.70006	8.25019e-15	8.56923e-13
CSTF3	1.39964	8.43432e-15	8.73579e-13
SUPT7L	0.923477	8.44037e-15	8.73579e-13
PPP4C	1.37794	8.90096e-15	9.19625e-13
RANGAP1	1.3667	8.92588e-15	9.20576e-13
PAFAH1B3	2.01189	9.00487e-15	9.26307e-13
MMP11	4.90001	9.02586e-15	9.26307e-13
YWHAE	1.24743	9.02889e-15	9.26307e-13
ENOPH1	1.15959	9.28779e-15	9.51203e-13
TDP1	1.42304	9.46019e-15	9.67168e-13
SPG21	1.03819	9.96582e-15	1.01709e-12
MED30	1.71696	1.00662e-14	1.02429e-12
SNHG15	1.61891	1.00714e-14	1.02429e-12
SLC16A13	2.32135	1.02434e-14	1.03917e-12
SCAMP3	1.25785	1.02532e-14	1.03917e-12
NPM3	2.05499	1.05543e-14	1.06695e-12
SH3BP1	2.75919	1.05637e-14	1.06695e-12
CAPZA1	1.28755	1.0745e-14	1.08339e-12
DDX49	1.26809	1.08208e-14	1.08916e-12
CSTF2	1.59156	1.14374e-14	1.14925e-12
SMARCD1	1.27569	1.15017e-14	1.1536e-12
PSME4	1.17427	1.15201e-14	1.1536e-12
CALR	1.1693	1.1642e-14	1.16382e-12
RQCD1	1.18713	1.20293e-14	1.20049e-12
SF3B3	1.3818	1.20806e-14	1.20356e-12
MCM8	1.94434	1.21779e-14	1.2112e-12
PPHLN1	1.03781	1.24072e-14	1.23043e-12
ESCO2	2.86122	1.24133e-14	1.23043e-12
GEN1	1.83154	1.27719e-14	1.26383e-12
ACOT7	1.96505	1.30694e-14	1.2911e-12
HMGA1	2.29078	1.31623e-14	1.29808e-12
UBE2N	1.12847	1.32706e-14	1.30656e-12
PLA2G7	3.27517	1.34161e-14	1.31867e-12
WI2-2994D6.1	-4.40858	1.36155e-14	1.33603e-12
PVT1	2.32253	1.38854e-14	1.36024e-12
DDX11	1.75823	1.42201e-14	1.38861e-12
KPNB1	1.11109	1.42225e-14	1.38861e-12
RP11-303E16.2	1.88828	1.42669e-14	1.39063e-12
SLC4A1AP	0.942999	1.44988e-14	1.41088e-12
TMPOP2	4.32968	1.51121e-14	1.46813e-12
ACTR2	1.01416	1.53081e-14	1.48471e-12
CDH24	2.2655	1.54764e-14	1.49855e-12
PATL1	1.32055	1.58914e-14	1.5362e-12
CYP4A22-AS1	4.36389	1.59397e-14	1.53832e-12
BANF1	1.67327	1.67662e-14	1.61542e-12
CDK4	1.77287	1.68406e-14	1.61993e-12
METTL1	1.44966	1.69094e-14	1.62388e-12
SASS6	1.79789	1.725e-14	1.65388e-12
SMC4	1.95502	1.74914e-14	1.67429e-12
IGF2BP3	5.02078	1.76001e-14	1.68194e-12
ARL6IP6	1.70388	1.7863e-14	1.70377e-12
RP11-763B22.11	-4.7007	1.78866e-14	1.70377e-12
CRTC2	1.06863	1.79703e-14	1.70896e-12
UBALD2	1.41358	1.81884e-14	1.7269e-12
ZHX1-C8orf76	1.77617	1.84097e-14	1.74508e-12
HSPE1	1.704	1.85286e-14	1.75351e-12
PSMA2	1.07868	1.88192e-14	1.77815e-12
EWSR1	0.891015	1.88875e-14	1.78172e-12
SUB1	1.44397	1.91612e-14	1.80464e-12
RNPS1	1.20052	1.92139e-14	1.8067e-12
SFSWAP	0.975369	1.94326e-14	1.82433e-12
MRPL3	1.44974	1.9488e-14	1.82661e-12
THOC6	1.54634	1.99256e-14	1.86463e-12
POLR2G	1.2662	2.02542e-14	1.89236e-12
SRSF1	1.04008	2.06598e-14	1.92719e-12
DHX8	1.11241	2.09652e-14	1.95257e-12
ANKRD13D	1.52392	2.1633e-14	2.01156e-12
CNOT2	1.21593	2.18127e-14	2.02505e-12
NDC1	1.74856	2.18927e-14	2.02926e-12
H2AFY	1.17743	2.21718e-14	2.05189e-12
COIL	1.14335	2.23126e-14	2.06166e-12
GNL2	1.39032	2.24743e-14	2.07333e-12
CCKAR	-7.25002	2.26318e-14	2.08214e-12
MAPRE1	1.16899	2.26408e-14	2.08214e-12
CACYBP	1.52902	2.3746e-14	2.18035e-12
DNAJC7	1.09602	2.38342e-14	2.18241e-12
RBM42	1.27513	2.38429e-14	2.18241e-12
DDX39B	1.0529	2.41797e-14	2.20978e-12
PRRC2C	0.983293	2.4805e-14	2.2634e-12
EIF4A1	1.33786	2.5257e-14	2.30106e-12
NUP93	1.48698	2.55278e-14	2.32212e-12
NUTF2	1.48889	2.61854e-14	2.37825e-12
LYAR	1.64102	2.6612e-14	2.41325e-12
NUDT5	1.60955	2.80772e-14	2.54218e-12
NOX4	3.20352	2.82179e-14	2.55098e-12
CDC123	1.5148	2.84552e-14	2.56846e-12
FOXP3	2.91301	2.88153e-14	2.59697e-12
C19orf48	1.78752	2.95714e-14	2.66102e-12
ITGB3BP	1.36111	3.11997e-14	2.80324e-12
DDX56	1.32102	3.20123e-14	2.87185e-12
MAFG-AS1	2.285	3.30883e-14	2.96383e-12
ARPC1B	2.10113	3.32159e-14	2.97072e-12
TRIM11	1.14755	3.36191e-14	3.00219e-12
TMEM69	1.30183	3.48217e-14	3.10485e-12
SMYD5	1.25902	3.55522e-14	3.16517e-12
TCOF1	1.68384	3.5707e-14	3.17413e-12
TPRKB	1.23211	3.58497e-14	3.18199e-12
TRA2B	1.24745	3.59151e-14	3.18297e-12
RP11-1149O23.3	2.17852	3.61609e-14	3.19991e-12
DPY30	1.25097	3.72677e-14	3.29288e-12
RP11-803D5.4	2.70546	3.7666e-14	3.32306e-12
PLAU	3.4444	3.81642e-14	3.36195e-12
RFC5	1.73179	3.84048e-14	3.37807e-12
ETV4	3.58607	3.86356e-14	3.39327e-12
MICB	3.09095	3.99848e-14	3.50651e-12
HSPBP1	1.25768	4.04518e-14	3.54216e-12
TIMM8A	1.34142	4.12164e-14	3.60372e-12
PYCRL	1.75364	4.19385e-14	3.6614e-12
SARNP	0.998936	4.24154e-14	3.69753e-12
NOP58	1.39269	4.26732e-14	3.71447e-12
LSM2	1.35809	4.29211e-14	3.73051e-12
HOTAIR	6.08972	4.31629e-14	3.74597e-12
C19orf47	1.06984	4.36966e-14	3.78668e-12
CXCL8	4.74214	4.40429e-14	3.81104e-12
CBX8	1.78924	4.46394e-14	3.85696e-12
MCM6	1.79963	4.48531e-14	3.86972e-12
HIST1H4J	2.2259	4.55988e-14	3.92827e-12
RP11-932O9.10	2.75934	4.77648e-14	4.10882e-12
ALG6	1.21456	4.8417e-14	4.15882e-12
SLBP	1.40021	4.85876e-14	4.16737e-12
SHFM1	1.87365	4.8954e-14	4.19266e-12
HNRNPU	1.06161	5.03092e-14	4.30243e-12
TSN	1.33664	5.17759e-14	4.42141e-12
AC006011.4	1.66862	5.31195e-14	4.52954e-12
FGD6	2.12139	5.37377e-14	4.5756e-12
HNRNPAB	1.19724	5.39107e-14	4.58366e-12
RAC1	1.35585	5.41516e-14	4.59747e-12
DLX4	3.94316	5.4233e-14	4.59772e-12
C20orf24	1.71261	5.44443e-14	4.60896e-12
DBF4B	1.81983	5.5582e-14	4.69848e-12
TMSB10	1.85793	5.72791e-14	4.83497e-12
HNRNPA1P21	3.80441	5.76232e-14	4.85701e-12
C16orf89	-5.68522	5.92479e-14	4.98678e-12
CCDC43	1.11823	6.32613e-14	5.31695e-12
TRMT1	1.38284	6.34088e-14	5.32171e-12
COMMD5	1.19994	6.40633e-14	5.36894e-12
ZGPAT	1.02904	6.4158e-14	5.3692e-12
COLGALT1	1.60515	6.47259e-14	5.409e-12
SNRNP40	1.25939	6.75495e-14	5.63692e-12
TRIAP1	1.12757	6.91787e-14	5.76466e-12
LRRC42	1.26491	7.23956e-14	6.01873e-12
E2F3	1.73945	7.24331e-14	6.01873e-12
MTCH2	1.45389	7.30421e-14	6.05659e-12
RP11-576I22.2	3.92316	7.30956e-14	6.05659e-12
CCZ1	1.25547	7.321e-14	6.0575e-12
MGME1	1.60498	7.41814e-14	6.12923e-12
YWHAG	1.52185	7.51832e-14	6.19623e-12
NABP2	1.32252	7.52039e-14	6.19623e-12
PPP1CA	1.36254	7.67849e-14	6.31761e-12
POLE3	1.42055	7.70676e-14	6.33197e-12
EMC8	1.2332	7.75262e-14	6.36073e-12
AGAP2-AS1	2.44674	7.91423e-14	6.48424e-12
HNRNPA1	1.06612	8.09445e-14	6.62264e-12
TTC4	1.18565	8.20322e-14	6.70227e-12
PTGES3P1	1.16824	8.2147e-14	6.7023e-12
EIF5A	1.46098	8.23004e-14	6.70548e-12
POC5	1.33733	8.24861e-14	6.71128e-12
SLC35B1	1.26251	8.33224e-14	6.76992e-12
HOXA11	5.9551	8.48164e-14	6.8783e-12
RP11-439A17.10	-4.58569	8.48912e-14	6.8783e-12
POP7	1.60095	9.23856e-14	7.47519e-12
SNHG17	1.77944	9.29699e-14	7.51209e-12
NGDN	1.24361	9.3476e-14	7.54259e-12
FASTKD3	1.3357	9.37089e-14	7.55098e-12
LIMK1	1.73742	9.40762e-14	7.57016e-12
COMMD4	1.26237	9.57081e-14	7.69092e-12
SLC38A7	1.21654	9.8042e-14	7.86767e-12
BICD1	2.03986	9.89094e-14	7.92642e-12
MITD1	1.29316	9.99522e-14	7.99904e-12
RNF149	1.14046	1.01286e-13	8.09469e-12
STK3	1.46802	1.02444e-13	8.17612e-12
U2SURP	1.43162	1.02685e-13	8.18417e-12
PCBP1	0.890034	1.05465e-13	8.39114e-12
HMGXB4	1.20216	1.05568e-13	8.39114e-12
PSMB1	1.18323	1.05714e-13	8.39134e-12
POLA2	1.74373	1.06211e-13	8.41942e-12
PGA4	-11.0452	1.0704e-13	8.47364e-12
HMCES	1.58249	1.08077e-13	8.54421e-12
SSB	1.31146	1.09206e-13	8.62184e-12
SAMD4B	1.04196	1.09783e-13	8.65575e-12
SUMO1	1.10996	1.12322e-13	8.84399e-12
PPP1R8	1.00483	1.14613e-13	9.00692e-12
NASP	1.44025	1.14699e-13	9.00692e-12
PTRH2	1.41439	1.14994e-13	9.01801e-12
GLA	1.72017	1.15638e-13	9.05642e-12
AGTRAP	1.81751	1.16129e-13	9.08272e-12
TBRG4	1.30611	1.18668e-13	9.26894e-12
AUP1	1.02133	1.19616e-13	9.33053e-12
ACBD6	1.19014	1.21402e-13	9.44581e-12
CTA-384D8.35	4.14225	1.21416e-13	9.44581e-12
RP11-598F7.5	3.48752	1.22014e-13	9.4797e-12
TRAF2	1.43522	1.22546e-13	9.50842e-12
DONSON	1.57746	1.22767e-13	9.51302e-12
ANKLE2	1.26076	1.24652e-13	9.64294e-12
H2AFZ	1.55736	1.24773e-13	9.64294e-12
ENO1	1.7354	1.2591e-13	9.71329e-12
MCM5	2.04475	1.26015e-13	9.71329e-12
CENPP	2.12294	1.26708e-13	9.75382e-12
LSM8	1.29093	1.2793e-13	9.82597e-12
EXOSC9	1.15231	1.2798e-13	9.82597e-12
PARP12	1.67606	1.28435e-13	9.84795e-12
MAGOHB	1.55651	1.31e-13	1.00315e-11
ICT1	1.21521	1.39036e-13	1.0633e-11
PSMD10	1.17688	1.40908e-13	1.07621e-11
RBM34	1.3245	1.45079e-13	1.10662e-11
HIST1H1B	4.61666	1.45477e-13	1.10821e-11
VPS72	1.08269	1.45893e-13	1.10994e-11
PGA5	-10.3812	1.47075e-13	1.11749e-11
PRICKLE3	1.52761	1.48248e-13	1.12493e-11
PNO1	1.24453	1.49382e-13	1.13208e-11
CH17-125A10.1	-5.44424	1.49635e-13	1.13253e-11
SKP2	2.19422	1.50838e-13	1.14016e-11
SART3	0.98121	1.51103e-13	1.14069e-11
WDR18	1.45655	1.51873e-13	1.14472e-11
BMS1	1.0885	1.52027e-13	1.14472e-11
APEX2	1.37352	1.54054e-13	1.15739e-11
TOR1A	1.08682	1.54105e-13	1.15739e-11
SLC25A39	1.26645	1.56371e-13	1.1729e-11
ST20	1.77976	1.56995e-13	1.17608e-11
HOXA10-AS	5.61259	1.57252e-13	1.1765e-11
GPR84	3.33906	1.58795e-13	1.18653e-11
ILDR1	3.56512	1.6105e-13	1.20184e-11
ADIPOQ	-5.25235	1.65111e-13	1.22848e-11
TWISTNB	1.30088	1.65304e-13	1.22848e-11
MED19	1.16946	1.65361e-13	1.22848e-11
LAGE3	1.66648	1.65458e-13	1.22848e-11
DAP3	1.06207	1.68937e-13	1.25272e-11
SKA2	1.63505	1.72104e-13	1.27459e-11
SLC25A17	1.04599	1.72933e-13	1.27911e-11
ASCC3	1.2718	1.74066e-13	1.28444e-11
TCF3	1.64953	1.74091e-13	1.28444e-11
S100A3	3.1595	1.76106e-13	1.29767e-11
GPER1	-3.13196	1.79189e-13	1.31873e-11
RP11-803D5.1	2.25587	1.84182e-13	1.35377e-11
UTP14A	1.26484	1.90581e-13	1.39746e-11
TDG	1.29848	1.90602e-13	1.39746e-11
PPP3R1	0.995277	1.91608e-13	1.40307e-11
NOC4L	1.31146	1.92946e-13	1.41111e-11
ANGPT2	2.44681	1.94648e-13	1.42178e-11
MSH2	1.63157	1.96439e-13	1.43307e-11
MEN1	1.26122	1.96836e-13	1.43419e-11
PPIAP22	1.57533	2.01248e-13	1.46451e-11
FBL	1.4828	2.01949e-13	1.46779e-11
STIP1	1.41085	2.02393e-13	1.4692e-11
TTF2	1.80631	2.06583e-13	1.49775e-11
CFAP20	1.23966	2.09193e-13	1.5148e-11
NSUN2	1.32573	2.10027e-13	1.51896e-11
PWP1	1.06737	2.11614e-13	1.52855e-11
BLACAT1	4.3351	2.13891e-13	1.5431e-11
DNAJC2	1.52596	2.26036e-13	1.62871e-11
RELL2	2.42467	2.27472e-13	1.63303e-11
EIF5AL1	1.64581	2.27649e-13	1.63303e-11
ILF3	1.13395	2.2774e-13	1.63303e-11
TMEM60	1.2033	2.2775e-13	1.63303e-11
RRP9	1.50144	2.28353e-13	1.63535e-11
NBEAP3	5.02987	2.32102e-13	1.66017e-11
NAA25	1.08312	2.35871e-13	1.68507e-11
PSME2P2	1.76034	2.48208e-13	1.77105e-11
GTF2H4	1.23067	2.5052e-13	1.78536e-11
DDA1	1.18596	2.52011e-13	1.79381e-11
PSMD1	1.04785	2.53348e-13	1.80114e-11
RCE1	1.35373	2.56493e-13	1.82129e-11
HOXD9	3.1338	2.58372e-13	1.8306e-11
U2AF2	1.09147	2.58429e-13	1.8306e-11
CLN6	1.53532	2.62575e-13	1.85772e-11
YWHAB	1.08644	2.63164e-13	1.85964e-11
METTL13	1.10926	2.63999e-13	1.86329e-11
TBC1D7	1.53677	2.69972e-13	1.90315e-11
TBC1D10B	1.01642	2.78101e-13	1.9581e-11
NPY2R	-3.28673	2.79012e-13	1.96216e-11
TADA1	1.06499	2.81525e-13	1.97746e-11
INCENP	1.68394	2.82037e-13	1.97868e-11
ISG15	3.18837	2.82712e-13	1.98104e-11
TYMP	3.0086	2.85384e-13	1.99738e-11
DNMT3B	2.79783	2.89554e-13	2.02415e-11
CCDC58	1.53746	2.92417e-13	2.04173e-11
ZNF367	2.10172	2.93112e-13	2.04414e-11
LSM5	1.41466	2.94234e-13	2.04953e-11
FTSJ2	1.24881	3.00247e-13	2.08893e-11
TUBA1C	1.86221	3.01247e-13	2.0934e-11
POMP	1.32615	3.05181e-13	2.11822e-11
OTUD6B	1.382	3.08909e-13	2.14156e-11
SNHG3	1.76908	3.14446e-13	2.17737e-11
LRWD1	1.46794	3.15707e-13	2.18352e-11
UBR5	1.19788	3.21121e-13	2.21834e-11
PGA3	-10.9286	3.22701e-13	2.22451e-11
PMS2P10	1.6969	3.23194e-13	2.22451e-11
PRKDC	1.61581	3.23502e-13	2.22451e-11
ODF2	1.31451	3.23532e-13	2.22451e-11
M6PR	1.14601	3.24668e-13	2.2297e-11
CENPQ	1.75598	3.26809e-13	2.24178e-11
CDC25A	2.28072	3.3028e-13	2.26294e-11
FAM104A	0.973016	3.31249e-13	2.26693e-11
NKRF	1.358	3.42057e-13	2.33816e-11
C11orf84	1.75299	3.47781e-13	2.37408e-11
RABIF	1.17337	3.48274e-13	2.37408e-11
CSF2	5.8813	3.48528e-13	2.37408e-11
TMEM189	1.79154	3.50461e-13	2.38289e-11
MRPL17	1.37783	3.50634e-13	2.38289e-11
PPAT	1.67194	3.55214e-13	2.41122e-11
TTLL5	1.11335	3.56225e-13	2.41528e-11
SMN1	1.24669	3.59812e-13	2.43678e-11
CARD14	3.24612	3.6025e-13	2.43693e-11
SMPD4	1.1534	3.73784e-13	2.52556e-11
MCM3	1.73829	3.7684e-13	2.54328e-11
C4orf46	1.70748	3.83269e-13	2.58369e-11
CCNE1	2.6678	3.87101e-13	2.60577e-11
GNPDA1	1.3619	3.87434e-13	2.60577e-11
SSRP1	1.25037	3.88406e-13	2.60932e-11
LDHA	1.84786	3.92967e-13	2.63693e-11
HMGB1	1.33631	3.99164e-13	2.67545e-11
FZD2	3.00887	4.01341e-13	2.68696e-11
S100A11	2.20771	4.01991e-13	2.68824e-11
WDR70	1.3136	4.1019e-13	2.73995e-11
NOC2L	1.3289	4.14224e-13	2.76222e-11
RAD1	1.40634	4.14468e-13	2.76222e-11
PRPF19	1.37843	4.1595e-13	2.76895e-11
PDRG1	1.26553	4.1823e-13	2.78097e-11
ADAR	1.22193	4.2473e-13	2.82099e-11
REXO4	1.22427	4.25388e-13	2.82216e-11
MRPL14	1.61385	4.31365e-13	2.85857e-11
SNRPB2	1.37138	4.34112e-13	2.87353e-11
DCTPP1	1.53217	4.3908e-13	2.90313e-11
C1D	0.97397	4.41599e-13	2.9165e-11
CAD	1.58505	4.43764e-13	2.92749e-11
HIST1H2AE	3.21721	4.5212e-13	2.97926e-11
PTPN12	1.5232	4.52863e-13	2.9808e-11
SALL4	4.42719	4.5835e-13	3.01354e-11
SIRT6	1.2371	4.60161e-13	3.02205e-11
HIST1H1E	2.59479	4.66313e-13	3.05903e-11
NFKBIB	1.18882	4.75007e-13	3.11257e-11
SAC3D1	1.61836	4.8189e-13	3.15415e-11
C14orf180	-4.54883	4.85084e-13	3.1715e-11
DDX41	1.18098	4.9811e-13	3.25304e-11
CDH3	4.26439	5.12354e-13	3.34234e-11
FARSA	1.19512	5.24486e-13	3.41768e-11
RNF220	1.00272	5.25542e-13	3.42075e-11
YTHDF1	1.09199	5.31288e-13	3.44907e-11
FAM86JP	2.2522	5.3133e-13	3.44907e-11
MRTO4	1.23338	5.31659e-13	3.44907e-11
FAM60A	1.69164	5.33102e-13	3.45461e-11
PSMC2	1.38887	5.38772e-13	3.48749e-11
DDX55	1.19447	5.42525e-13	3.50791e-11
TARS	1.29679	5.44015e-13	3.51367e-11
GLRX3	1.41611	5.50426e-13	3.55116e-11
HMGN4	1.30261	5.7239e-13	3.6888e-11
PUS7	1.81867	5.74086e-13	3.69566e-11
NEDD1	1.44282	5.75192e-13	3.69872e-11
YRDC	1.17072	5.8125e-13	3.73358e-11
PSMB7	1.31895	5.88985e-13	3.77912e-11
ADAM12	3.94687	5.9934e-13	3.84135e-11
PRPF31	0.99523	6.09336e-13	3.90115e-11
TMEM201	1.51251	6.11991e-13	3.91387e-11
HIST1H2BL	4.11712	6.15043e-13	3.92598e-11
CSNK1G2	1.06435	6.15226e-13	3.92598e-11
SENP3	1.24049	6.19711e-13	3.95031e-11
FRMD8	1.43478	6.21011e-13	3.95429e-11
AKIRIN2	1.13681	6.27739e-13	3.99279e-11
TFG	1.25143	6.40277e-13	4.06812e-11
SLC1A5	1.5922	6.43802e-13	4.08608e-11
PFDN6	1.52934	6.60772e-13	4.18925e-11
WDR34	1.68533	6.6477e-13	4.21004e-11
COL7A1	4.08578	6.75298e-13	4.2721e-11
DDX11-AS1	2.44273	6.89312e-13	4.35605e-11
RHNO1	1.54339	6.90698e-13	4.36011e-11
CCDC86	1.50467	6.96818e-13	4.394e-11
HMGB2	1.94652	6.98813e-13	4.40185e-11
MCMBP	1.01508	7.03754e-13	4.42821e-11
PRRC2A	1.06277	7.06263e-13	4.43826e-11
PSMC3	1.04097	7.06867e-13	4.43826e-11
EIF2B2	1.13058	7.14416e-13	4.47999e-11
EIF1AD	0.899456	7.15042e-13	4.47999e-11
IKBIP	1.82977	7.23185e-13	4.52616e-11
PRKCSH	1.01137	7.26818e-13	4.54405e-11
PMAIP1	2.44057	7.30101e-13	4.55971e-11
PAQR4	1.90478	7.39644e-13	4.61439e-11
MTA2	1.07885	7.44174e-13	4.63771e-11
ADAMTS12	3.54053	7.56923e-13	4.71215e-11
CEP131	1.33111	7.7281e-13	4.80594e-11
PPIAP29	1.80622	7.73717e-13	4.80648e-11
HIST1H3B	5.56497	7.78878e-13	4.83342e-11
PSMD4	1.11972	7.89085e-13	4.89158e-11
ZC3H8	1.32013	8.07503e-13	5.00046e-11
KIAA1614-AS1	3.49576	8.09352e-13	5.00661e-11
TUBG1	1.38461	8.16454e-13	5.04522e-11
BYSL	1.62187	8.72621e-13	5.38428e-11
HIST1H2AL	5.5025	8.73161e-13	5.38428e-11
MRPL4	1.31189	8.74263e-13	5.3854e-11
KPTN	1.4691	9.01503e-13	5.54737e-11
CCNK	1.1536	9.30038e-13	5.71695e-11
POLR2K	1.25547	9.31304e-13	5.71873e-11
PMCH	4.3944	9.3334e-13	5.72524e-11
R3HDM4	1.19443	9.42511e-13	5.77544e-11
CDK5RAP1	1.14428	9.44387e-13	5.78089e-11
CMC2	1.12268	9.69226e-13	5.92675e-11
FIGNL1	1.77026	9.72656e-13	5.94152e-11
GRN	1.36116	1.00531e-12	6.13459e-11
TBCB	1.4645	1.01034e-12	6.15888e-11
CLDN4	4.15553	1.01456e-12	6.17815e-11
CBWD5	1.48512	1.01722e-12	6.18792e-11
PGK1	1.40116	1.01935e-12	6.19447e-11
NHP2L1	1.09104	1.02512e-12	6.22306e-11
BOLA2B	1.87374	1.03159e-12	6.25586e-11
APOC1	3.49848	1.03763e-12	6.286e-11
TFAP4	1.64487	1.05208e-12	6.36693e-11
GMPS	1.74001	1.05542e-12	6.38054e-11
HIST1H2BJ	3.45975	1.05705e-12	6.38381e-11
UCN2	4.73932	1.06075e-12	6.39954e-11
HNRNPD	1.04857	1.0639e-12	6.412e-11
SLC25A32	1.24254	1.07866e-12	6.49426e-11
PABPN1	1.16019	1.08218e-12	6.50874e-11
ATP2A2	1.19374	1.08619e-12	6.52618e-11
ARMC6	1.23085	1.0881e-12	6.53094e-11
DROSHA	1.35296	1.09194e-12	6.54729e-11
UFD1L	1.21278	1.09711e-12	6.57158e-11
POLD2	1.41576	1.09872e-12	6.57446e-11
EIF6	1.50583	1.12442e-12	6.72139e-11
AMMECR1	1.68001	1.13275e-12	6.76426e-11
CKAP5	1.45296	1.14704e-12	6.84262e-11
SF3B2	0.903448	1.1533e-12	6.87299e-11
RHBDD2	1.25618	1.1671e-12	6.94234e-11
RP11-2C24.9	0.929945	1.16731e-12	6.94234e-11
HNRNPK	0.91748	1.17205e-12	6.96345e-11
RPL26L1	1.36026	1.19196e-12	7.07458e-11
C1QTNF6	2.74752	1.21353e-12	7.1953e-11
GARS	1.23783	1.21501e-12	7.19682e-11
MTX2	0.964783	1.21825e-12	7.2087e-11
GEMIN2	1.38324	1.21949e-12	7.20875e-11
KRT8P12	1.70235	1.22892e-12	7.25717e-11
TAF1A	1.52714	1.24197e-12	7.32686e-11
TRMT112	1.52965	1.25708e-12	7.40853e-11
FOXD2-AS1	2.62585	1.27714e-12	7.51923e-11
KB-1208A12.3	1.45111	1.28881e-12	7.58031e-11
SAAL1	1.36547	1.29523e-12	7.61044e-11
RIPK2	1.63629	1.29748e-12	7.616e-11
ITPA	1.3049	1.30579e-12	7.65711e-11
RP4-594A5.1	6.94937	1.32043e-12	7.73523e-11
BLCAP	1.38692	1.32249e-12	7.73955e-11
SDS	3.52877	1.33846e-12	7.8252e-11
REEP4	1.8432	1.35137e-12	7.89277e-11
METTL23	1.11204	1.3626e-12	7.95046e-11
PRMT5	1.31347	1.38726e-12	8.08625e-11
TPST2	1.52077	1.39366e-12	8.11548e-11
MIS18BP1	1.55663	1.40252e-12	8.15897e-11
CLEC5A	3.21255	1.41388e-12	8.21691e-11
AP1S1	1.63664	1.42181e-12	8.24456e-11
TNFRSF4	2.36022	1.42267e-12	8.24456e-11
TNFAIP8L1	1.51222	1.42286e-12	8.24456e-11
HM13	1.10211	1.44327e-12	8.35459e-11
BCL11B	2.93341	1.44537e-12	8.35844e-11
CTA-384D8.34	5.93605	1.4849e-12	8.57859e-11
PSME3	1.13083	1.49307e-12	8.61732e-11
C1orf35	1.24047	1.50364e-12	8.66975e-11
CST1	6.634	1.51136e-12	8.70569e-11
GGH	2.46779	1.5197e-12	8.74513e-11
OAS3	2.18195	1.5228e-12	8.75441e-11
AC011997.1	4.66904	1.54763e-12	8.88838e-11
ATIC	1.51468	1.56231e-12	8.96392e-11
CTPS1	1.69972	1.56869e-12	8.99022e-11
C20orf27	1.65932	1.56996e-12	8.99022e-11
HTR1E	-4.92726	1.57294e-12	8.99849e-11
WDR4	1.40844	1.57718e-12	9.01391e-11
RP11-443B20.1	1.87003	1.59939e-12	9.13196e-11
PSMD7	1.04237	1.60432e-12	9.14783e-11
ATR	1.38261	1.60529e-12	9.14783e-11
PMS2CL	1.02158	1.62048e-12	9.22539e-11
DNAH3	3.33509	1.62801e-12	9.25927e-11
ANP32B	1.10225	1.64718e-12	9.35919e-11
DDX54	1.00456	1.65114e-12	9.37263e-11
OLFML2B	2.96027	1.66337e-12	9.43293e-11
CXorf56	1.16682	1.6876e-12	9.56108e-11
PSMB5	1.20167	1.70279e-12	9.62906e-11
PDE6D	1.11697	1.70289e-12	9.62906e-11
MED27	1.32168	1.71177e-12	9.66996e-11
DAZAP1	1.03457	1.7429e-12	9.83629e-11
GHRL	-4.71184	1.74994e-12	9.86655e-11
SUV39H2	1.57315	1.75547e-12	9.88818e-11
RPS19	1.34536	1.78768e-12	1.006e-10
PIGW	1.49096	1.79513e-12	1.00922e-10
PDCL3	1.1352	1.80046e-12	1.01124e-10
NONO	1.18122	1.80466e-12	1.01263e-10
CDC37	0.980173	1.82498e-12	1.02305e-10
LEMD2	0.903008	1.86178e-12	1.04194e-10
HEATR1	1.43518	1.86223e-12	1.04194e-10
SGPL1	1.30266	1.90324e-12	1.06387e-10
TOPBP1	1.64082	1.91148e-12	1.06746e-10
ATP6V1C1	1.18039	1.95359e-12	1.08994e-10
TRAPPC3	0.890268	1.95778e-12	1.09124e-10
SUPT16H	1.25244	1.96964e-12	1.0968e-10
ANAPC11	1.18969	1.97153e-12	1.09681e-10
HIST1H2BM	5.52219	2.00996e-12	1.11713e-10
PDCD10	1.28132	2.01787e-12	1.12009e-10
CRIPT	1.02139	2.01912e-12	1.12009e-10
MIER2	0.992258	2.03254e-12	1.12647e-10
DUSP12	1.0366	2.04343e-12	1.13144e-10
WBSCR22	1.35255	2.06324e-12	1.14133e-10
TRAF3	1.33132	2.07523e-12	1.14688e-10
BRAT1	1.1793	2.08552e-12	1.15148e-10
ARF1	0.880493	2.14124e-12	1.18113e-10
LIN9	1.56995	2.16709e-12	1.19426e-10
XRCC6	1.06814	2.17136e-12	1.19549e-10
MEST	2.70134	2.17441e-12	1.19605e-10
SP3	1.10501	2.19343e-12	1.20538e-10
IRAK1	1.488	2.19803e-12	1.20677e-10
TAP1	2.11468	2.23658e-12	1.22679e-10
CCDC59	1.13732	2.27689e-12	1.24773e-10
HDAC1	1.24111	2.30393e-12	1.26137e-10
TMEM102	1.47835	2.33715e-12	1.27783e-10
MYBBP1A	1.32044	2.33835e-12	1.27783e-10
TAZ	1.1581	2.35361e-12	1.28497e-10
ENY2	1.20088	2.38088e-12	1.29865e-10
EIF2AK1	1.16352	2.38452e-12	1.29906e-10
AC068491.2	3.94126	2.38607e-12	1.29906e-10
NCAPD2	1.82459	2.43542e-12	1.32469e-10
CCT8	1.09513	2.44018e-12	1.32527e-10
C1orf147	2.6912	2.44101e-12	1.32527e-10
C14orf1	1.31076	2.46674e-12	1.33794e-10
PTMA	1.16957	2.46891e-12	1.33794e-10
TIMM50	1.15375	2.474e-12	1.33946e-10
IFNGR2	1.29837	2.47751e-12	1.34012e-10
F11R	1.65777	2.53917e-12	1.3722e-10
EIF2B1	0.952636	2.55281e-12	1.37831e-10
RP11-42I10.1	3.26717	2.56899e-12	1.38577e-10
TARBP2	1.18002	2.5916e-12	1.39668e-10
PARP9	1.70407	2.60818e-12	1.40432e-10
PDCD5	1.48247	2.61241e-12	1.4053e-10
PAK1IP1	1.48492	2.6518e-12	1.42519e-10
RPL26P30	3.37597	2.67251e-12	1.435e-10
NOL12	1.16853	2.68578e-12	1.4408e-10
MTL5	2.9849	2.69556e-12	1.44473e-10
EFNA4	1.75576	2.72108e-12	1.45707e-10
HMGN2	1.28543	2.74816e-12	1.47023e-10
TMPO-AS1	2.20189	2.75625e-12	1.47321e-10
RP11-540A21.2	2.66169	2.80833e-12	1.49968e-10
TMEM26	2.67128	2.83072e-12	1.51026e-10
NUP155	1.62877	2.84389e-12	1.5159e-10
RP11-108K3.1	4.41484	2.84742e-12	1.51641e-10
LSM4	1.3948	2.85135e-12	1.51712e-10
HIATL1	1.12972	2.93544e-12	1.56044e-10
KHSRP	1.15344	2.94431e-12	1.56374e-10
YY1	1.00593	2.95158e-12	1.56618e-10
TMUB2	0.957474	3.03366e-12	1.60828e-10
SERPINH1	2.24129	3.04322e-12	1.61189e-10
RP11-1094M14.11	1.63515	3.06256e-12	1.62067e-10
AC083899.3	1.38183	3.0768e-12	1.62673e-10
IL11	3.52039	3.08106e-12	1.62752e-10
PPP1CC	0.915361	3.0996e-12	1.63584e-10
C19orf24	1.26851	3.15767e-12	1.66498e-10
MTHFD2	1.40655	3.16073e-12	1.6651e-10
TPD52L2	1.18518	3.16757e-12	1.6672e-10
TIGD1	1.62517	3.18561e-12	1.67519e-10
PGCP1	-3.9313	3.22019e-12	1.69185e-10
ARPC5L	1.15449	3.22574e-12	1.69325e-10
ARL6IP1	1.51419	3.22907e-12	1.69348e-10
HSP90B1	1.24604	3.26728e-12	1.71199e-10
ANAPC7	1.17711	3.34494e-12	1.75111e-10
GSS	1.25405	3.35673e-12	1.75572e-10
EMC3-AS1	1.84183	3.37136e-12	1.7618e-10
PRPF4	1.4084	3.39331e-12	1.77169e-10
SRSF7	0.963458	3.42798e-12	1.7882e-10
AP5Z1	1.12232	3.43727e-12	1.79145e-10
HOXA1	2.86723	3.48309e-12	1.81371e-10
MRPL12	1.36467	3.51196e-12	1.82712e-10
NCSTN	0.984481	3.56677e-12	1.85399e-10
SNX5	1.22868	3.57264e-12	1.8554e-10
FAM58A	1.19116	3.57981e-12	1.85748e-10
IL4I1	2.6708	3.66418e-12	1.89957e-10
MIIP	1.38192	3.71922e-12	1.9264e-10
DERL1	1.28129	3.72979e-12	1.93016e-10
MMP1	4.77577	3.73563e-12	1.93133e-10
SMC2	1.65878	3.73863e-12	1.93133e-10
HDGFRP2	0.994864	3.77552e-12	1.94867e-10
NKIRAS2	1.16023	3.83673e-12	1.97712e-10
MATR3	0.890846	3.84017e-12	1.97712e-10
GS1-120K12.4	5.48567	3.84077e-12	1.97712e-10
OGFR	1.14305	3.89931e-12	2.00549e-10
DUS4L	1.40168	3.93486e-12	2.022e-10
THUMPD2	1.0266	3.96596e-12	2.0362e-10
CD58	1.38478	4.01306e-12	2.05857e-10
GTF3C2	1.01318	4.05981e-12	2.08073e-10
NOL11	1.1959	4.11844e-12	2.10894e-10
RP11-807H7.2	-3.46605	4.17791e-12	2.13752e-10
PCSK9	4.31413	4.19023e-12	2.14195e-10
RP5-884M6.1	5.87989	4.20279e-12	2.1465e-10
SNRNP27	0.853236	4.34091e-12	2.21511e-10
DHX16	0.925227	4.41075e-12	2.24722e-10
SPERT	6.02335	4.41151e-12	2.24722e-10
RBMX	0.900238	4.48472e-12	2.28253e-10
CD80	2.88608	4.50838e-12	2.29258e-10
RBM17	1.16451	4.52168e-12	2.29735e-10
CCT6A	1.56661	4.60021e-12	2.33522e-10
TRIB3	2.69791	4.64087e-12	2.35382e-10
NPLOC4	1.05288	4.64689e-12	2.35484e-10
WDR43	1.4178	4.66986e-12	2.36443e-10
GPS1	1.02399	4.72165e-12	2.38859e-10
RSRC1	1.43108	4.75744e-12	2.40462e-10
NCBP2	1.37235	4.77283e-12	2.41032e-10
WDR46	1.13159	4.80071e-12	2.42042e-10
CTB-193M12.5	1.92961	4.8011e-12	2.42042e-10
EDEM2	1.29631	4.8271e-12	2.43144e-10
MPHOSPH10	0.981095	4.89096e-12	2.46149e-10
GORAB	1.22647	4.89593e-12	2.46187e-10
OLA1	1.1383	4.9068e-12	2.46522e-10
E2F4	1.16265	5.01285e-12	2.51635e-10
SSBP1	1.17042	5.08421e-12	2.54998e-10
RAP2C	1.13671	5.09318e-12	2.5523e-10
RP11-783K16.5	3.68678	5.18522e-12	2.59419e-10
RP11-570P14.1	2.10983	5.18563e-12	2.59419e-10
HSPA4	1.23013	5.19326e-12	2.59579e-10
DPP3	1.32358	5.20323e-12	2.59855e-10
PTPN1	1.11498	5.22273e-12	2.60441e-10
ERAL1	1.16151	5.22384e-12	2.60441e-10
RAD9A	1.31449	5.29999e-12	2.64013e-10
IER5L	1.80264	5.33771e-12	2.65665e-10
CHTOP	0.892468	5.43662e-12	2.70359e-10
TPR	1.02786	5.46865e-12	2.71721e-10
PPP1R14B	1.74159	5.55356e-12	2.75706e-10
TMEM261P1	-1.39315	5.61415e-12	2.78478e-10
STAT1	1.98363	5.62253e-12	2.78658e-10
BMP1	1.94549	5.63076e-12	2.7883e-10
APOC2	4.65994	5.67197e-12	2.80633e-10
RPF1	0.959675	5.80934e-12	2.87188e-10
SPATA5L1	1.18783	6.14357e-12	3.03371e-10
PTPN6	1.44409	6.14707e-12	3.03371e-10
COPS5	1.01117	6.25214e-12	3.08297e-10
RAD21	1.31916	6.27549e-12	3.09188e-10
TSEN54	1.40016	6.29155e-12	3.09719e-10
DCUN1D5	1.5255	6.33695e-12	3.11692e-10
GTF2E1	1.25256	6.37346e-12	3.13001e-10
C16orf93	1.82624	6.37425e-12	3.13001e-10
UBE2Z	0.973903	6.4002e-12	3.14012e-10
ZGRF1	1.65898	6.44035e-12	3.15717e-10
POGK	1.06315	6.5715e-12	3.21877e-10
CARM1	1.17486	6.60213e-12	3.23107e-10
PSRC1	2.10557	6.71875e-12	3.28388e-10
TRABD	1.15976	6.72124e-12	3.28388e-10
GTPBP4	1.35595	6.74702e-12	3.29372e-10
KLHL7	1.37235	6.7654e-12	3.29995e-10
HNRNPF	1.05942	6.98765e-12	3.40552e-10
EHMT2	1.3276	7.00213e-12	3.40974e-10
VMA21	1.27527	7.01647e-12	3.41389e-10
C9orf142	1.31542	7.07219e-12	3.43667e-10
BCL2L11	1.3027	7.07504e-12	3.43667e-10
HAUS5	1.50158	7.26664e-12	3.52682e-10
RP11-398C13.6	1.67374	7.35678e-12	3.56761e-10
TSEN34	1.10652	7.38614e-12	3.57889e-10
ATP1B3	2.23114	7.43297e-12	3.5986e-10
MFAP2	3.3957	7.45484e-12	3.6031e-10
EXOSC4	1.42491	7.45843e-12	3.6031e-10
DIEXF	1.25601	7.46071e-12	3.6031e-10
ZC3H18	1.0252	7.46814e-12	3.60371e-10
RBCK1	1.23036	7.48007e-12	3.6065e-10
RTN4R	2.29719	7.49909e-12	3.6127e-10
HSPA5	1.12036	7.56907e-12	3.64342e-10
EXOSC2	1.21269	7.59447e-12	3.65105e-10
TSFM	1.0269	7.59739e-12	3.65105e-10
CCT2	1.59698	7.72483e-12	3.70925e-10
BUD31	1.42707	7.75386e-12	3.71674e-10
FKBP3	1.18515	7.75424e-12	3.71674e-10
SMC3	1.15434	7.75946e-12	3.71674e-10
TAF11	1.01904	7.80914e-12	3.73748e-10
TYMSOS	2.31604	7.87004e-12	3.76355e-10
SERPINB5	4.78933	7.91926e-12	3.784e-10
C10orf55	3.56823	7.98458e-12	3.8121e-10
LINC00671	-4.77112	8.03481e-12	3.83296e-10
WDR74	1.18613	8.05962e-12	3.84166e-10
BAZ1A	1.38563	8.11149e-12	3.86325e-10
SNX8	1.56171	8.19308e-12	3.89448e-10
XPR1	1.91568	8.19657e-12	3.89448e-10
PHF19	1.63824	8.19701e-12	3.89448e-10
PPAN	1.20034	8.25254e-12	3.91768e-10
C1orf174	1.02072	8.27055e-12	3.92305e-10
CISD2	1.03429	8.3023e-12	3.93493e-10
RP11-485G7.5	4.76872	8.36834e-12	3.96302e-10
RP11-142E9.1	1.9028	8.47583e-12	4.01068e-10
CEP72	1.97558	8.51313e-12	4.02508e-10
C14orf80	1.41621	8.53718e-12	4.0332e-10
NSFL1C	1.10145	8.55687e-12	4.03924e-10
RP4-735C1.6	-3.07226	8.59276e-12	4.05292e-10
C10orf91	4.04941	8.66581e-12	4.08408e-10
CNOT3	0.974214	8.69162e-12	4.09296e-10
GALK1	1.3212	8.70357e-12	4.09529e-10
NOL10	1.05034	8.80737e-12	4.14081e-10
RNF2	1.33961	8.82247e-12	4.14458e-10
EPRS	1.01315	8.87148e-12	4.16426e-10
LA16c-60H5.7	3.74174	8.91628e-12	4.18194e-10
APMAP	1.36016	9.08236e-12	4.25643e-10
TAF6	1.42339	9.10514e-12	4.2637e-10
QSOX2	1.50438	9.14293e-12	4.27797e-10
GPN3	1.25231	9.21122e-12	4.30649e-10
GTF3C5	1.37283	9.24564e-12	4.31913e-10
MYO1B	1.93531	9.29115e-12	4.33693e-10
TIMM23	1.14012	9.39783e-12	4.38324e-10
TUBBP1	2.11644	9.42607e-12	4.39291e-10
CTD-2231E14.8	1.12115	1.01506e-11	4.72679e-10
SMG7	1.07369	1.02192e-11	4.75496e-10
ATP6AP2	1.09431	1.02769e-11	4.77801e-10
TUBB3	3.43963	1.02937e-11	4.78202e-10
SAE1	1.18334	1.03513e-11	4.80499e-10
WBSCR28	5.40406	1.04399e-11	4.84226e-10
COQ2	1.06298	1.0458e-11	4.84544e-10
TEX10	1.21164	1.04633e-11	4.84544e-10
SLC3A2	1.73335	1.0482e-11	4.85029e-10
CTCF	0.871667	1.05058e-11	4.85748e-10
CLDN16	4.20553	1.05427e-11	4.87069e-10
GAR1	1.08387	1.07241e-11	4.95059e-10
CHMP4B	1.05047	1.08217e-11	4.9917e-10
CBX2	3.28655	1.08778e-11	5.01362e-10
RRP12	1.1512	1.08952e-11	5.01772e-10
LAS1L	1.0998	1.09109e-11	5.02096e-10
RP11-34F20.7	2.65941	1.09306e-11	5.0261e-10
AKIP1	1.13608	1.0979e-11	5.04183e-10
NUDT15	1.39723	1.0982e-11	5.04183e-10
H2AFV	1.16905	1.09928e-11	5.04285e-10
FAM220A	1.19715	1.10122e-11	5.04779e-10
FAM91A1	1.39334	1.10297e-11	5.05184e-10
BLOC1S3	1.07	1.10438e-11	5.05433e-10
USP42	1.12017	1.10767e-11	5.06312e-10
SRPK1	1.32485	1.10866e-11	5.06312e-10
PSMD12	1.15578	1.10889e-11	5.06312e-10
MFI2	3.20533	1.13314e-11	5.16983e-10
CXCL1	4.45811	1.13914e-11	5.19315e-10
KB-1732A1.1	2.79745	1.14604e-11	5.22055e-10
ZNF706	1.31206	1.15597e-11	5.2617e-10
RNF126	1.14864	1.15722e-11	5.26331e-10
MRPS5	0.966955	1.15974e-11	5.27065e-10
PGAM5	1.34071	1.16659e-11	5.29765e-10
DHX37	1.12906	1.19065e-11	5.40273e-10
C19orf53	1.23114	1.19807e-11	5.43222e-10
BGN	2.90824	1.21681e-11	5.51293e-10
MPHOSPH9	1.46051	1.23692e-11	5.59969e-10
MMP14	2.03353	1.2426e-11	5.62104e-10
TFRC	2.26917	1.26468e-11	5.71655e-10
EIF2AK2	1.58109	1.26742e-11	5.7245e-10
VTA1	1.15322	1.28013e-11	5.77746e-10
TMEM199	1.08459	1.28182e-11	5.77831e-10
ISY1	1.22305	1.28229e-11	5.77831e-10
LINC01296	4.1538	1.28776e-11	5.79849e-10
DDX23	0.818982	1.31839e-11	5.93186e-10
CCSAP	1.50344	1.32398e-11	5.95242e-10
MCTS1	1.03773	1.32537e-11	5.9541e-10
SMC6	1.45413	1.33563e-11	5.9956e-10
GPR19	2.68129	1.33726e-11	5.99831e-10
HSPBAP1	1.34709	1.34218e-11	6.0158e-10
YWHAZ	1.43132	1.35842e-11	6.08392e-10
STRN4	0.881874	1.36186e-11	6.09468e-10
TTC26	1.486	1.366e-11	6.10853e-10
HAT1	1.17023	1.38806e-11	6.20243e-10
HAPLN3	2.2319	1.39727e-11	6.23882e-10
SPATA33	1.45719	1.39939e-11	6.24356e-10
STAMBP	0.925074	1.40216e-11	6.25112e-10
ADPGK	1.06572	1.4232e-11	6.34011e-10
TAGLN2	1.23427	1.43592e-11	6.39191e-10
FAM225A	3.07544	1.44362e-11	6.41779e-10
SRM	1.41872	1.44392e-11	6.41779e-10
RFXANK	1.20331	1.4455e-11	6.41994e-10
TIPIN	1.38842	1.45069e-11	6.43809e-10
ACTR5	1.2065	1.45233e-11	6.4405e-10
CHD8	0.908444	1.47162e-11	6.52111e-10
PPIB	1.18489	1.47438e-11	6.52839e-10
PCGF6	1.11839	1.47623e-11	6.53165e-10
P3H1	1.62905	1.48343e-11	6.55853e-10
BLOC1S2	1.12713	1.48855e-11	6.57623e-10
PHB	1.18706	1.49551e-11	6.60198e-10
RP11-680A11.5	1.63288	1.50694e-11	6.64744e-10
NUP188	1.18114	1.50955e-11	6.65396e-10
VPS25	1.04914	1.51169e-11	6.65836e-10
NUPL2	1.21074	1.55375e-11	6.83849e-10
RP11-589N15.2	3.06257	1.56267e-11	6.87256e-10
TOMM5	1.40214	1.5643e-11	6.8746e-10
NXF1	0.836509	1.59721e-11	7.01395e-10
DIMT1	0.916836	1.60579e-11	7.04231e-10
LTV1	1.06169	1.60607e-11	7.04231e-10
CLDN1	3.98615	1.61301e-11	7.06745e-10
VRK2	1.06858	1.63529e-11	7.1597e-10
ATP2C1	1.29161	1.64208e-11	7.18405e-10
CNTROB	1.19249	1.65468e-11	7.2338e-10
NIT2	1.33542	1.65812e-11	7.24341e-10
OTUB1	1.14493	1.6648e-11	7.26717e-10
CPOX	1.28906	1.67826e-11	7.3205e-10
ESPN	3.25669	1.68061e-11	7.32507e-10
CASP5	4.68195	1.68181e-11	7.32507e-10
HSP90AA1	1.383	1.71205e-11	7.45123e-10
GMEB2	0.982678	1.73149e-11	7.53022e-10
ADRBK1	1.14557	1.73442e-11	7.53737e-10
GTPBP10	1.40862	1.73641e-11	7.54044e-10
RFWD2	1.00917	1.73842e-11	7.54359e-10
PPIAP31	1.64513	1.74461e-11	7.56334e-10
NECAP2	0.909125	1.74555e-11	7.56334e-10
ATAD3A	1.27567	1.74794e-11	7.56806e-10
TTI1	1.21843	1.75101e-11	7.57576e-10
ZP3	2.58305	1.75714e-11	7.59669e-10
ZNF143	0.763216	1.75989e-11	7.60295e-10
MEA1	1.36781	1.77359e-11	7.65651e-10
CCDC138	1.63373	1.77897e-11	7.66656e-10
POP1	1.59051	1.77909e-11	7.66656e-10
RAD23A	1.08789	1.77985e-11	7.66656e-10
RNF40	0.900633	1.78372e-11	7.67759e-10
PSMC6	0.967857	1.79229e-11	7.70882e-10
MTX1	1.17269	1.81744e-11	7.81126e-10
PSMC3IP	1.47613	1.81988e-11	7.81126e-10
MTPAP	1.15244	1.82011e-11	7.81126e-10
PSME1	1.24544	1.83647e-11	7.8757e-10
RHOG	1.10302	1.84055e-11	7.88746e-10
RNF34	0.932353	1.84698e-11	7.9092e-10
CEP85	1.44329	1.85326e-11	7.93029e-10
RITA1	1.09841	1.89546e-11	8.10329e-10
NAT10	1.24884	1.89645e-11	8.10329e-10
LIPA	1.33422	1.9144e-11	8.17403e-10
ZBTB2	0.993936	1.92024e-11	8.19297e-10
TAF6L	1.13885	1.9275e-11	8.21796e-10
SNRNP200	0.996119	1.93236e-11	8.2327e-10
AQR	0.918548	1.93475e-11	8.23688e-10
LAD1	2.66438	1.98054e-11	8.42573e-10
SLC12A9	1.48505	1.9861e-11	8.44323e-10
DDX21	1.29189	1.98845e-11	8.44527e-10
AC004988.1	4.2348	1.98946e-11	8.44527e-10
RANP1	1.90809	1.99794e-11	8.47511e-10
PIGC	1.10249	2.01499e-11	8.54126e-10
HIST1H4I	2.7624	2.02313e-11	8.56955e-10
SRP19	0.974788	2.03423e-11	8.61033e-10
ZNHIT3	0.882712	2.04561e-11	8.65227e-10
NAE1	1.23729	2.06855e-11	8.743e-10
DHFR	1.68095	2.09903e-11	8.86179e-10
ARHGDIA	1.04046	2.09969e-11	8.86179e-10
SFPQ	0.822629	2.12376e-11	8.95224e-10
MOV10	1.39092	2.12417e-11	8.95224e-10
FAM45A	1.08792	2.12903e-11	8.96624e-10
SAP30BP	0.922779	2.14387e-11	9.02229e-10
NANP	1.17018	2.16053e-11	9.08585e-10
SHISA5	1.04919	2.16879e-11	9.11405e-10
CHKB-AS1	1.95001	2.17463e-11	9.13203e-10
HPRT1	1.32333	2.18122e-11	9.15317e-10
GAPLINC	2.89176	2.22975e-11	9.35011e-10
SNHG12	1.49435	2.23138e-11	9.35027e-10
ABT1	1.01248	2.24189e-11	9.38756e-10
EIF3I	0.957034	2.24676e-11	9.40125e-10
IRF3	1.24505	2.24838e-11	9.40131e-10
CEP89	1.19587	2.25056e-11	9.40372e-10
TMEM11	0.992826	2.26189e-11	9.44432e-10
HTRA2	0.996124	2.27323e-11	9.4849e-10
CIRH1A	1.25107	2.29593e-11	9.57278e-10
ASB11	-5.41997	2.31916e-11	9.66278e-10
TYK2	1.08733	2.34011e-11	9.74315e-10
PSMC1	1.07832	2.34465e-11	9.75513e-10
IKBKG	1.10241	2.4326e-11	1.01139e-09
DNTTIP1	1.35221	2.45017e-11	1.01769e-09
MTHFD1	1.2686	2.45124e-11	1.01769e-09
PGF	2.78116	2.46714e-11	1.02357e-09
HSPA14	1.16613	2.47556e-11	1.02633e-09
SMARCA4	1.15746	2.48212e-11	1.02833e-09
NEDD8	1.01408	2.48388e-11	1.02833e-09
KBTBD2	1.00511	2.49521e-11	1.03162e-09
EXOSC1	0.944381	2.49535e-11	1.03162e-09
CSNK1E	1.05072	2.50359e-11	1.03429e-09
LSG1	1.38645	2.53888e-11	1.04813e-09
ARHGAP39	1.77547	2.55614e-11	1.05433e-09
USF1	1.01544	2.55748e-11	1.05433e-09
RHBDD3	1.17182	2.58057e-11	1.06262e-09
DPP9	0.977455	2.58124e-11	1.06262e-09
KDM1A	1.25948	2.60585e-11	1.072e-09
DLEU7	2.36793	2.60856e-11	1.07236e-09
MRPS12	1.23981	2.61362e-11	1.07369e-09
MRPL38	1.00824	2.62446e-11	1.07739e-09
NOLC1	1.27193	2.64433e-11	1.08479e-09
PPP1R2P3	3.73186	2.73207e-11	1.11999e-09
TOR3A	1.24514	2.74585e-11	1.12486e-09
CCDC77	1.44653	2.7577e-11	1.12892e-09
AC092614.2	2.31846	2.76877e-11	1.13218e-09
VPS9D1-AS1	2.5316	2.76951e-11	1.13218e-09
RFC2	1.55296	2.78347e-11	1.13709e-09
PLAUR	2.24604	2.81935e-11	1.15065e-09
GLO1	1.2104	2.82059e-11	1.15065e-09
HSP90AB1	1.33541	2.82367e-11	1.15096e-09
MIF	1.71438	2.8253e-11	1.15096e-09
CTU1	1.13851	2.84262e-11	1.15722e-09
SRP9	0.996457	2.86909e-11	1.16718e-09
WNT2	3.74791	2.89481e-11	1.17683e-09
KARS	1.02461	2.91429e-11	1.18393e-09
REXO1	0.874823	2.92814e-11	1.18873e-09
ATP6V1F	1.23521	2.97889e-11	1.20849e-09
IKBKE	1.76684	2.98106e-11	1.20853e-09
MRPS28	1.14705	3.01774e-11	1.22256e-09
ELK1	1.22247	3.02008e-11	1.22266e-09
CDK2AP1	1.4109	3.02809e-11	1.22506e-09
PARP14	1.68646	3.04602e-11	1.23146e-09
NOL8	1.01175	3.10391e-11	1.254e-09
CDC23	0.974893	3.12339e-11	1.261e-09
PFKP	1.53819	3.12581e-11	1.26111e-09
SLC35C2	1.0074	3.13797e-11	1.26514e-09
XRCC6BP1	1.20202	3.14613e-11	1.26756e-09
RP13-221M14.3	-3.59878	3.15407e-11	1.26989e-09
ZFP64	1.52375	3.16066e-11	1.27167e-09
PDZD11	1.18603	3.16633e-11	1.27238e-09
ZFAS1	1.43539	3.16678e-11	1.27238e-09
GTF2H3	1.28566	3.17133e-11	1.27333e-09
HOXC13	5.92396	3.17578e-11	1.27387e-09
ANAPC10	1.02639	3.177e-11	1.27387e-09
CCDC73	2.98843	3.18889e-11	1.27724e-09
AK2	0.968298	3.18978e-11	1.27724e-09
MRPL11	1.25179	3.22714e-11	1.29132e-09
FBXO45	1.59002	3.22967e-11	1.29145e-09
MAN1B1	1.10792	3.24114e-11	1.29515e-09
RP11-252K23.2	2.78518	3.25619e-11	1.30028e-09
COA1	0.981932	3.26894e-11	1.30448e-09
ABCF1	0.921618	3.28038e-11	1.30816e-09
RUNX1	1.65411	3.29176e-11	1.3118e-09
HIST2H4A	3.06218	3.30769e-11	1.31708e-09
RP11-642A1.2	2.38557	3.30952e-11	1.31708e-09
EMC9	1.17607	3.34213e-11	1.32916e-09
HES1	1.49767	3.35589e-11	1.33373e-09
ATP4B	-8.17474	3.38168e-11	1.34307e-09
SLC10A3	1.32768	3.43561e-11	1.36356e-09
MAPKAPK5	0.928457	3.44754e-11	1.36737e-09
TFAP2A	3.73632	3.48028e-11	1.37942e-09
RP11-806H10.4	3.87324	3.49142e-11	1.38261e-09
RP5-1157M23.2	2.57764	3.49304e-11	1.38261e-09
2022-09-15	0.953671	3.49559e-11	1.38268e-09
CCDC34	2.01969	3.50528e-11	1.38558e-09
DGKZP1	1.20106	3.51809e-11	1.3897e-09
DNAJC8	0.852352	3.53338e-11	1.39481e-09
KIF24	1.77687	3.54313e-11	1.39771e-09
TMED9	0.940863	3.55986e-11	1.40337e-09
SLC25A22	1.46177	3.58098e-11	1.41074e-09
RP11-298C3.2	2.02668	3.59106e-11	1.41376e-09
MRPL19	0.970374	3.5944e-11	1.41413e-09
FXYD5	2.06296	3.61026e-11	1.41942e-09
TM9SF4	0.946095	3.65222e-11	1.43495e-09
MBD4	1.15201	3.67574e-11	1.44322e-09
PRPF38A	0.98909	3.69878e-11	1.45129e-09
CTD-2006C1.6	1.89582	3.72268e-11	1.4597e-09
E2F8	2.40358	3.73304e-11	1.46278e-09
RBMX2	1.06327	3.80434e-11	1.48972e-09
ESRRB	-3.72242	3.82036e-11	1.49456e-09
BAZ1B	1.06313	3.8218e-11	1.49456e-09
RPP40	1.60192	3.84292e-11	1.50182e-09
PARP1	1.28145	3.86104e-11	1.50789e-09
SUV420H2	1.47941	3.89185e-11	1.51891e-09
TRPM2	2.50364	3.91838e-11	1.52825e-09
CTA-989H11.1	2.28891	3.95135e-11	1.54008e-09
RNF8	0.993124	3.97838e-11	1.54959e-09
XRCC4	1.48489	4.03457e-11	1.57043e-09
CTSV	3.29354	4.10977e-11	1.59864e-09
ARHGEF1	1.13144	4.13951e-11	1.60913e-09
ORMDL2	1.23239	4.25841e-11	1.65426e-09
LINS	1.08818	4.29813e-11	1.66858e-09
CAPG	1.7767	4.34242e-11	1.68466e-09
IFI30	1.97761	4.36957e-11	1.69407e-09
MARVELD3	2.43074	4.39256e-11	1.7016e-09
COL10A1	5.91558	4.3948e-11	1.7016e-09
PSMB9	2.42591	4.4349e-11	1.71599e-09
IFITM3	1.98126	4.45525e-11	1.72273e-09
RNF114	1.26739	4.48485e-11	1.73229e-09
RP11-370A5.1	4.81091	4.4859e-11	1.73229e-09
GID8	0.956309	4.50518e-11	1.73859e-09
SPINT2	1.83762	4.52481e-11	1.74501e-09
ORC5	1.29828	4.55467e-11	1.75538e-09
CCDC109B	1.6805	4.56652e-11	1.75879e-09
ADAM17	1.63833	4.58135e-11	1.76334e-09
C11orf80	1.88251	4.59569e-11	1.7677e-09
WRAP73	0.985901	4.65303e-11	1.78827e-09
PRMT3	1.30554	4.65529e-11	1.78827e-09
PHF6	1.28216	4.66002e-11	1.78892e-09
GINS3	1.69581	4.70197e-11	1.80384e-09
ERI3	1.13527	4.74214e-11	1.81787e-09
UMPS	1.35855	4.74476e-11	1.81787e-09
SOX11	4.01327	4.75922e-11	1.82222e-09
CEP78	1.332	4.7932e-11	1.83403e-09
WDR61	0.804543	4.86049e-11	1.85697e-09
SLC16A3	1.88358	4.86226e-11	1.85697e-09
COMMD2	1.36614	4.86265e-11	1.85697e-09
PDSS1	1.71226	5.0199e-11	1.91577e-09
GGCX	0.992994	5.07891e-11	1.93703e-09
AP3M2	1.51714	5.0883e-11	1.93935e-09
MDK	2.50948	5.19814e-11	1.97992e-09
MOB4	0.862411	5.21796e-11	1.98618e-09
ALKBH6	1.25028	5.23604e-11	1.99177e-09
RP5-908M14.9	1.71794	5.39818e-11	2.05208e-09
KLF16	1.22312	5.40159e-11	2.05208e-09
TELO2	1.11054	5.44161e-11	2.06594e-09
LGALS8	1.09955	5.44962e-11	2.06765e-09
LSM6	1.27911	5.4538e-11	2.06789e-09
HMGN1	1.13993	5.46686e-11	2.0715e-09
AC005795.1	1.48726	5.50854e-11	2.08594e-09
TMEM68	1.14978	5.55997e-11	2.10406e-09
DDX47	1.0718	5.61788e-11	2.1246e-09
RPLP0P2	4.42111	5.63598e-11	2.13007e-09
MALSU1	1.01498	5.68966e-11	2.14897e-09
EFCAB11	1.2768	5.75074e-11	2.17065e-09
FBXL6	1.64651	5.81145e-11	2.19215e-09
TMEM223	1.19392	5.83474e-11	2.19952e-09
CASP2	1.30874	5.83924e-11	2.1998e-09
NUP133	1.02942	5.90052e-11	2.22145e-09
CDK7	1.11304	5.90488e-11	2.22167e-09
CDCP1	1.89736	5.91459e-11	2.22389e-09
RPN1	1.12421	5.96387e-11	2.24099e-09
TIMM17A	0.910721	5.97826e-11	2.24495e-09
PDCD6	1.3179	5.99171e-11	2.24856e-09
PHF20	1.04265	6.04622e-11	2.26756e-09
GART	1.06975	6.10058e-11	2.28649e-09
NCOA6	0.978409	6.11499e-11	2.29024e-09
INTS8	1.229	6.1184e-11	2.29024e-09
TLCD1	1.96168	6.13114e-11	2.29354e-09
HAUS6	1.36895	6.14022e-11	2.29547e-09
SLMO2	1.22933	6.14791e-11	2.29658e-09
NUP98	0.927868	6.1547e-11	2.29658e-09
SDHAF2	0.873933	6.15495e-11	2.29658e-09
RP11-670E13.6	2.03371	6.16469e-11	2.29875e-09
H3F3A	1.08001	6.21309e-11	2.31532e-09
ROMO1	1.31246	6.25427e-11	2.32919e-09
MPHOSPH6	1.27259	6.37091e-11	2.37112e-09
TOMM6	1.43818	6.3791e-11	2.37266e-09
RP11-259N19.1	2.42973	6.42955e-11	2.38991e-09
MAZ	1.24672	6.47823e-11	2.40648e-09
AC008268.1	-5.24332	6.56039e-11	2.43433e-09
CEP135	1.45661	6.56152e-11	2.43433e-09
KLC2	1.29006	6.57155e-11	2.43651e-09
SUPT5H	0.812224	6.63137e-11	2.45713e-09
NAV2-AS4	-2.1544	6.65818e-11	2.46551e-09
B3GAT3	1.14697	6.67095e-11	2.46715e-09
DRG1	0.975633	6.67104e-11	2.46715e-09
POLR2J	1.40803	6.69535e-11	2.47458e-09
RP11-545E17.3	1.83812	6.74812e-11	2.49251e-09
CDC27	1.04787	6.84219e-11	2.52566e-09
ANXA2	1.78467	6.8784e-11	2.53743e-09
GJB3	3.52762	6.89489e-11	2.54191e-09
RAD18	1.36402	7.02363e-11	2.58723e-09
UBXN2A	1.14716	7.02665e-11	2.58723e-09
B4GALT3	1.02499	7.05193e-11	2.59491e-09
TMPO	1.51791	7.12251e-11	2.61923e-09
2022-09-07	1.06117	7.17503e-11	2.63689e-09
NRD1	1.02164	7.21573e-11	2.65019e-09
TANK	0.920966	7.32383e-11	2.68821e-09
LINC00511	2.21803	7.33377e-11	2.69017e-09
FBXO22	1.14088	7.3542e-11	2.69597e-09
KRTAP4-1	7.27905	7.38121e-11	2.70418e-09
SLC4A11	2.97872	7.41399e-11	2.71294e-09
CBWD2	0.967471	7.41859e-11	2.71294e-09
TREM2	3.30678	7.419e-11	2.71294e-09
POP5	1.19511	7.496e-11	2.73938e-09
PELP1	1.08915	7.58134e-11	2.76885e-09
TAF1D	1.32084	7.5994e-11	2.77371e-09
GRK6	1.15987	7.64704e-11	2.78936e-09
ABCE1	1.11629	7.67703e-11	2.79856e-09
AHCY	1.2999	7.77533e-11	2.83263e-09
MRPL36	1.42685	7.83755e-11	2.85284e-09
HOXC-AS3	6.12364	7.84055e-11	2.85284e-09
EIF4A1P10	1.43716	7.85317e-11	2.85566e-09
PSMD3	1.70531	7.86378e-11	2.85774e-09
AHSA1	1.16075	7.89997e-11	2.86912e-09
ITGA2	2.21322	7.91288e-11	2.87202e-09
CNIH1	1.00338	7.959e-11	2.88697e-09
PDAP1	1.31731	7.97231e-11	2.89001e-09
RP11-650L12.2	2.73779	8.01127e-11	2.90234e-09
TREM1	3.85223	8.09987e-11	2.93262e-09
BAK1	1.41364	8.1718e-11	2.95684e-09
CCR8	3.53842	8.19956e-11	2.96505e-09
WDR54	1.85031	8.24239e-11	2.9787e-09
CDKN2D	1.63149	8.26499e-11	2.98503e-09
LRPPRC	1.09924	8.34999e-11	3.01387e-09
ZBTB9	1.16678	8.51536e-11	3.07166e-09
TMEM185B	1.32373	8.66168e-11	3.12252e-09
IL23A	2.86523	8.70055e-11	3.1341e-09
USP10	0.989219	8.70854e-11	3.1341e-09
GLE1	1.1902	8.70986e-11	3.1341e-09
SCO2	1.6035	8.72646e-11	3.13815e-09
CIAO1	0.859838	8.80586e-11	3.16476e-09
SCRIB	1.35614	8.83633e-11	3.17377e-09
DARS2	1.52024	8.87891e-11	3.1871e-09
TMEM50A	0.899172	8.89057e-11	3.18789e-09
GRB2	1.01196	8.89198e-11	3.18789e-09
SDCCAG3	1.21144	8.92059e-11	3.19619e-09
RNF7	1.28152	9.00996e-11	3.22624e-09
LINC00940	-4.62721	9.0439e-11	3.23641e-09
DUXAP9	4.08098	9.11933e-11	3.25949e-09
CEP128	1.45808	9.12069e-11	3.25949e-09
RP1-198K11.5	1.62351	9.12508e-11	3.25949e-09
SPAST	1.2626	9.17108e-11	3.27392e-09
FUBP1	0.986276	9.20829e-11	3.28521e-09
HIST1H3F	5.37615	9.21407e-11	3.28527e-09
GTF2A2	1.05759	9.24517e-11	3.29435e-09
PSMG1	1.49388	9.25541e-11	3.296e-09
CSNK2B	1.08328	9.36945e-11	3.33458e-09
UCKL1	1.05148	9.38889e-11	3.33802e-09
SUPV3L1	0.963073	9.3905e-11	3.33802e-09
ANAPC5	0.821563	9.4604e-11	3.36082e-09
POLB	1.50738	9.50504e-11	3.37464e-09
THOC3	1.76615	9.52518e-11	3.37974e-09
TAF5	1.08258	9.5522e-11	3.38575e-09
LEO1	1.09772	9.55683e-11	3.38575e-09
HAUS2	1.11193	9.55947e-11	3.38575e-09
GPR155	-2.54785	9.61391e-11	3.40297e-09
PUF60	1.24073	9.68972e-11	3.42774e-09
COPZ1	0.934432	9.72032e-11	3.43649e-09
NDUFB2-AS1	1.30077	9.74544e-11	3.43826e-09
LINC00853	3.58862	9.74701e-11	3.43826e-09
DUT	1.23004	9.74987e-11	3.43826e-09
CEP164	1.04259	9.75463e-11	3.43826e-09
SGK223	1.55628	9.75466e-11	3.43826e-09
XPOT	1.41648	9.77461e-11	3.44321e-09
CBX1	1.69983	9.85022e-11	3.46776e-09
ADCK5	1.47865	9.94713e-11	3.49978e-09
RTFDC1	0.907585	9.99883e-11	3.51585e-09
MRPL42	1.0276	1.00429e-10	3.52923e-09
DUS3L	1.03099	1.01217e-10	3.55477e-09
DPH2	1.1639	1.0133e-10	3.55664e-09
C1QBP	1.37457	1.01771e-10	3.56998e-09
HNRNPA1P48	1.12592	1.01975e-10	3.57498e-09
RP11-104H15.10	4.16885	1.03042e-10	3.61024e-09
FAP	3.29093	1.04178e-10	3.64783e-09
C17orf96	2.23349	1.04528e-10	3.65791e-09
TOR2A	1.29362	1.04784e-10	3.66467e-09
CYP27B1	2.18078	1.04898e-10	3.66649e-09
ALDH16A1	1.14268	1.05327e-10	3.67927e-09
CAPZB	0.825935	1.05501e-10	3.68316e-09
CENPJ	1.69367	1.06335e-10	3.71008e-09
GLMP	1.15828	1.08336e-10	3.77762e-09
NIP7	1.17937	1.09454e-10	3.81436e-09
QTRT1	1.01089	1.10747e-10	3.85713e-09
RP1-197B17.5	2.01671	1.10824e-10	3.85749e-09
PGS1	1.05703	1.10999e-10	3.86131e-09
RP1-134E15.3	3.48623	1.11152e-10	3.86432e-09
PANO1	2.02955	1.12265e-10	3.90069e-09
RP11-617F23.1	-2.11375	1.12411e-10	3.90347e-09
SNAPC4	1.13492	1.12931e-10	3.9192e-09
EGFL6	2.4488	1.13337e-10	3.93097e-09
TUBAP2	2.04684	1.14213e-10	3.95899e-09
CHI3L1	3.71192	1.15173e-10	3.98991e-09
RRP1	1.30205	1.15595e-10	4.00218e-09
GDI1	0.953326	1.15797e-10	4.00681e-09
SART1	1.23386	1.15944e-10	4.0095e-09
NUP88	1.13499	1.17285e-10	4.05351e-09
AGFG1	1.21211	1.17597e-10	4.06188e-09
C17orf62	1.02325	1.18031e-10	4.07445e-09
RPS21	1.3471	1.18694e-10	4.09493e-09
LCLAT1	1.18031	1.20706e-10	4.1619e-09
FARSB	1.03401	1.2146e-10	4.18545e-09
CPNE1	1.61915	1.21545e-10	4.1859e-09
RP11-626H12.2	4.75509	1.21724e-10	4.18961e-09
RNF181	1.0172	1.2267e-10	4.21969e-09
ARPC2	0.875096	1.22905e-10	4.2253e-09
TUG1	1.01968	1.2332e-10	4.23706e-09
RFX8	3.0886	1.2613e-10	4.33108e-09
TRMT61B	1.11317	1.28452e-10	4.40823e-09
OSBPL3	1.47529	1.28541e-10	4.4087e-09
TIMMDC1	1.09118	1.28685e-10	4.41104e-09
ACTR3	1.13257	1.31117e-10	4.49178e-09
SLC39A3	1.05202	1.31663e-10	4.50785e-09
WDR45B	0.976719	1.33131e-10	4.55545e-09
TMA16	1.15136	1.33498e-10	4.56535e-09
CTD-2357A8.3	5.62775	1.33659e-10	4.56762e-09
HSBP1	1.22043	1.3372e-10	4.56762e-09
MRPL51	1.14623	1.36838e-10	4.67138e-09
METTL17	0.95108	1.37702e-10	4.69815e-09
GNAI3	1.02249	1.3839e-10	4.71886e-09
U2AF1	1.12631	1.39328e-10	4.74808e-09
PRR5L	2.52544	1.39731e-10	4.75906e-09
DCK	1.17263	1.39969e-10	4.76439e-09
MAP4K4	1.37985	1.40101e-10	4.76611e-09
ADO	0.973681	1.41348e-10	4.80577e-09
PML	1.45274	1.42815e-10	4.85281e-09
B3GALT6	1.2025	1.43066e-10	4.85852e-09
TEX30	1.58285	1.44292e-10	4.89695e-09
COA6	1.59447	1.44365e-10	4.89695e-09
TOMM34	1.38866	1.46309e-10	4.9598e-09
R3HCC1L	0.866486	1.46387e-10	4.9598e-09
ANKRD39	1.31306	1.4648e-10	4.95999e-09
CTD-2540F13.2	2.69252	1.46562e-10	4.95999e-09
RABGGTB	0.957597	1.47736e-10	4.99685e-09
RAD51B	1.29819	1.50121e-10	5.07456e-09
RP11-496I2.5	5.48182	1.51939e-10	5.13305e-09
VAMP7	0.459904	1.53483e-10	5.18058e-09
VEZT	1.04944	1.53522e-10	5.18058e-09
CLP1	0.908813	1.53818e-10	5.18757e-09
USP18	1.98634	1.54865e-10	5.21987e-09
HIST1H4B	4.20578	1.5535e-10	5.23322e-09
HIST1H2BE	4.81187	1.55917e-10	5.24928e-09
RTKN2	2.56419	1.56696e-10	5.27249e-09
RBM28	1.11747	1.59158e-10	5.35227e-09
ZMYND19	1.20858	1.59892e-10	5.37387e-09
NOP10	1.24264	1.60576e-10	5.39374e-09
TIMM10	1.18392	1.61595e-10	5.42487e-09
CHD4	0.763366	1.61813e-10	5.42907e-09
YEATS4	1.49406	1.62011e-10	5.4326e-09
KCNE2	-5.60616	1.62234e-10	5.43696e-09
Z83851.4	1.82849	1.62544e-10	5.44426e-09
DTX2	1.54485	1.62751e-10	5.44806e-09
HIST1H2AM	3.95604	1.62898e-10	5.44988e-09
UBL4A	1.00912	1.65521e-10	5.53446e-09
GLRX2	0.989366	1.66206e-10	5.55421e-09
HIST1H3J	5.37862	1.68816e-10	5.63821e-09
MED10	1.1931	1.70674e-10	5.69701e-09
NPM1	1.12591	1.70962e-10	5.70337e-09
EMG1	1.237	1.71426e-10	5.71559e-09
TTC9C	1.02295	1.71661e-10	5.72018e-09
CAPRIN1	1.05226	1.71837e-10	5.72279e-09
MFSD2A	2.44051	1.72016e-10	5.7255e-09
TMEM104	1.06495	1.72388e-10	5.73462e-09
EXOSC3	1.26242	1.72603e-10	5.7385e-09
RAP2B	1.67528	1.73041e-10	5.74981e-09
RP11-274E7.2	1.68688	1.73717e-10	5.76899e-09
PLSCR1	1.55771	1.75065e-10	5.81047e-09
CPNE2	1.80667	1.76566e-10	5.85473e-09
UBA1	0.949707	1.76598e-10	5.85473e-09
NSDHL	1.33166	1.77656e-10	5.88647e-09
HNRNPH3	0.882387	1.78328e-10	5.90538e-09
C8orf59	1.14791	1.78508e-10	5.90799e-09
RPP21	1.21602	1.79821e-10	5.94812e-09
CHRNA5	2.23691	1.80281e-10	5.95675e-09
AF127577.8	5.461	1.80286e-10	5.95675e-09
HAUS7	1.46623	1.8041e-10	5.95748e-09
PLEKHG5	1.8469	1.80789e-10	5.96631e-09
PRR19	2.25717	1.80881e-10	5.96631e-09
CAMK1G	2.81042	1.81428e-10	5.98101e-09
MAPKAPK5-AS1	1.07161	1.83113e-10	6.03314e-09
POLR3C	0.852607	1.84346e-10	6.07035e-09
SRP68	0.870054	1.84754e-10	6.07818e-09
PHF20L1	1.08534	1.84791e-10	6.07818e-09
TAF1B	1.22359	1.85941e-10	6.11258e-09
MT1M	-3.88721	1.86744e-10	6.13552e-09
PTPN2	1.14631	1.87313e-10	6.15079e-09
CKMT2	-3.92552	1.88953e-10	6.20114e-09
CLCN2	1.76337	1.89287e-10	6.20864e-09
SLC35A2	1.30471	1.90075e-10	6.231e-09
INO80E	1.0347	1.92661e-10	6.31222e-09
UTP23	1.14837	1.94562e-10	6.37096e-09
PAK2	1.23507	1.9506e-10	6.38369e-09
CCKBR	-6.53394	1.9752e-10	6.46058e-09
TUBB4B	1.40298	1.98182e-10	6.47862e-09
EPT1	1.421	1.98561e-10	6.48741e-09
FAM187A	2.25771	1.9878e-10	6.49094e-09
MRPL55	0.993872	1.98922e-10	6.49194e-09
MYCBP	1.07616	1.99859e-10	6.51888e-09
RAVER1	1.11509	2.01385e-10	6.56502e-09
ANKRD32	1.31517	2.03802e-10	6.64012e-09
FAM83H	2.5003	2.04321e-10	6.65331e-09
KRT80	3.95068	2.06093e-10	6.7073e-09
DLEU1	1.37461	2.06889e-10	6.72947e-09
DDX52	1.00507	2.07871e-10	6.75765e-09
KATNB1	1.18795	2.08085e-10	6.76087e-09
CHERP	0.944073	2.11683e-10	6.87395e-09
NRF1	0.772998	2.11999e-10	6.88041e-09
DOHH	1.01886	2.12775e-10	6.90175e-09
PMS2	1.15175	2.13992e-10	6.93084e-09
NCLN	1.11154	2.14024e-10	6.93084e-09
NRBF2	1.02167	2.14027e-10	6.93084e-09
SLC12A8	1.9603	2.18711e-10	7.07862e-09
CTSC	2.1388	2.20373e-10	7.12847e-09
AC093616.4	2.50192	2.20986e-10	7.14438e-09
TBK1	1.11608	2.21182e-10	7.14676e-09
EFNB1	2.11937	2.22678e-10	7.19112e-09
SURF2	1.2321	2.23573e-10	7.21605e-09
DDX18	1.12106	2.23733e-10	7.21725e-09
ZCCHC10	0.873307	2.24429e-10	7.2357e-09
RPL38	1.24451	2.25052e-10	7.25179e-09
EXOSC8	1.16636	2.26713e-10	7.30132e-09
PIEZO1	1.35312	2.27403e-10	7.31949e-09
NOP16	1.22109	2.28387e-10	7.34714e-09
DPH7	1.01834	2.28955e-10	7.36138e-09
MMP9	3.69317	2.29153e-10	7.36369e-09
FOXK2	1.10317	2.29297e-10	7.36429e-09
KIF2A	1.18513	2.3001e-10	7.38315e-09
TOP1MT	1.66452	2.31173e-10	7.41559e-09
CEP152	1.42448	2.31275e-10	7.41559e-09
RPUSD1	1.14159	2.34304e-10	7.50862e-09
KIAA1429	0.919775	2.34622e-10	7.51471e-09
ITGB1BP1	1.03742	2.39522e-10	7.66746e-09
WNT3	2.61279	2.40649e-10	7.69932e-09
SAFB	0.751597	2.41424e-10	7.71989e-09
SLC38A6	1.37944	2.42283e-10	7.74316e-09
SCLT1	1.2163	2.44763e-10	7.81814e-09
POLR2D	1.18549	2.45074e-10	7.8238e-09
CH507-42P11.3	3.96334	2.46869e-10	7.87682e-09
SYMPK	0.85518	2.47076e-10	7.87913e-09
NEMP1	1.57632	2.47521e-10	7.88904e-09
KNSTRN	1.50326	2.47951e-10	7.89844e-09
LGALS8-AS1	2.77988	2.50011e-10	7.95974e-09
SLC39A1	1.08718	2.5177e-10	8.01136e-09
DNTTIP2	0.945118	2.52416e-10	8.02758e-09
TFDP1	1.3682	2.53819e-10	8.06782e-09
DTX3L	1.42509	2.55426e-10	8.11448e-09
CRNKL1	1.06457	2.56186e-10	8.13342e-09
PTK7	2.31151	2.563e-10	8.13342e-09
MYPOP	0.97074	2.56939e-10	8.1493e-09
NUP160	1.0584	2.57583e-10	8.16529e-09
AC027612.3	-5.37233	2.60415e-10	8.25062e-09
SEC22A	1.01687	2.61546e-10	8.28197e-09
APEX1	1.10593	2.63202e-10	8.32881e-09
MYO9B	0.991922	2.6331e-10	8.32881e-09
C14orf166	0.916581	2.63491e-10	8.33003e-09
TMCO6	1.09954	2.64057e-10	8.33912e-09
WDR53	1.49167	2.64063e-10	8.33912e-09
RNASE2	3.88438	2.66803e-10	8.42111e-09
ZBTB33	1.13222	2.70628e-10	8.53425e-09
ASNA1	0.984604	2.70679e-10	8.53425e-09
LAIR2	4.83189	2.70977e-10	8.53904e-09
AP000695.4	3.09733	2.72574e-10	8.58475e-09
MRPL37	1.08162	2.73047e-10	8.59503e-09
TACSTD2	3.24675	2.74143e-10	8.62489e-09
LINC01105	-5.69441	2.75352e-10	8.6583e-09
PKM	1.46918	2.75866e-10	8.66979e-09
SIX1	3.99306	2.76583e-10	8.68768e-09
USP14	1.32604	2.76979e-10	8.69546e-09
FCGR3A	3.11917	2.78003e-10	8.7185e-09
KDM2B	1.08802	2.78011e-10	8.7185e-09
CTU2	1.07705	2.81825e-10	8.83266e-09
TOMM22	1.04517	2.81953e-10	8.83266e-09
VDR	1.92739	2.82905e-10	8.85775e-09
CEP83-AS1	2.63132	2.83617e-10	8.87099e-09
DEDD	0.977798	2.8363e-10	8.87099e-09
GOLT1B	1.08853	2.84e-10	8.87782e-09
GUCY1B2	4.25251	2.85162e-10	8.90938e-09
FASTKD1	1.13925	2.85318e-10	8.9095e-09
KTI12	0.854377	2.87196e-10	8.96336e-09
SENP1	1.13736	2.89532e-10	9.02708e-09
ZNRD1	1.09687	2.89546e-10	9.02708e-09
STRA6	4.07286	2.90192e-10	9.04241e-09
PTCD1	1.33893	2.9165e-10	9.08301e-09
XRN2	1.06859	2.92075e-10	9.09143e-09
FIP1L1	0.909129	2.93303e-10	9.12479e-09
CCDC124	0.986758	2.94238e-10	9.14903e-09
CERS5	0.924202	2.94671e-10	9.15545e-09
GEMIN6	1.16732	2.9487e-10	9.15545e-09
FAM136A	1.08225	2.94914e-10	9.15545e-09
SLC5A12	4.84286	2.95612e-10	9.17228e-09
DR1	0.995738	2.95889e-10	9.176e-09
RP11-417E7.1	5.22984	2.9898e-10	9.26695e-09
NCAPD3	1.37509	3.00941e-10	9.32279e-09
PCIF1	0.892487	3.04227e-10	9.41961e-09
ADORA2B	3.03739	3.11466e-10	9.63669e-09
INHBA	3.64712	3.11567e-10	9.63669e-09
RRP36	1.14871	3.12074e-10	9.64728e-09
SMUG1	0.925006	3.13526e-10	9.68706e-09
RHOV	4.22915	3.15846e-10	9.75359e-09
COX6B2	3.85886	3.16314e-10	9.76289e-09
NSMCE2	1.16454	3.18048e-10	9.80787e-09
TMEM167A	0.946807	3.18106e-10	9.80787e-09
MCRS1	0.826951	3.18287e-10	9.80829e-09
RHEB	1.14822	3.20045e-10	9.85729e-09
SULF2	2.20639	3.21482e-10	9.89635e-09
ADAMDEC1	3.55099	3.22715e-10	9.92547e-09
TNFSF9	3.36375	3.22767e-10	9.92547e-09
WDR89	0.930287	3.29475e-10	1.01264e-08
NEURL3	3.82917	3.30389e-10	1.01492e-08
TIGAR	1.07983	3.3102e-10	1.01633e-08
AC092669.3	3.16035	3.33705e-10	1.02403e-08
MYO19	1.19145	3.34368e-10	1.02553e-08
TMEM177	1.37122	3.34651e-10	1.02586e-08
OSCAR	2.45749	3.36723e-10	1.03167e-08
HIST2H2AA4	2.19836	3.38353e-10	1.03612e-08
OAZ1	0.890673	3.38569e-10	1.03624e-08
MEMO1	1.1138	3.3919e-10	1.0376e-08
PSENEN	1.22116	3.39589e-10	1.03828e-08
ATAD3B	1.36705	3.39869e-10	1.0386e-08
ADAMTS14	2.52726	3.41244e-10	1.04225e-08
IFI27L2	1.89607	3.41891e-10	1.04369e-08
CDK5	1.30607	3.43755e-10	1.04883e-08
HSPD1	1.36221	3.45904e-10	1.05484e-08
ZNF7	1.00281	3.48225e-10	1.06136e-08
SAMD1	1.16227	3.49948e-10	1.06606e-08
RP1-191J18.66	1.76387	3.5078e-10	1.06804e-08
RP11-398H6.1	3.08024	3.52885e-10	1.07389e-08
DNAAF5	1.30223	3.56352e-10	1.08388e-08
TRIM14	1.54366	3.57641e-10	1.08723e-08
ADSS	0.9893	3.57913e-10	1.08749e-08
ATP5J2	1.474	3.58891e-10	1.0899e-08
MTF2	1.05231	3.59496e-10	1.09117e-08
PIGF	0.886827	3.64709e-10	1.10618e-08
LINC01270	2.7873	3.64819e-10	1.10618e-08
RPSAP52	4.57806	3.68505e-10	1.11678e-08
RPAP2	0.955804	3.70536e-10	1.12236e-08
RBX1	0.94888	3.71656e-10	1.12517e-08
FAM83H-AS1	3.06142	3.72537e-10	1.12699e-08
LIPF	-10.9341	3.72644e-10	1.12699e-08
RRP15	1.1285	3.77105e-10	1.1399e-08
LSM10	0.889644	3.77507e-10	1.14052e-08
ZNHIT6	0.973569	3.77931e-10	1.14121e-08
XPO5	1.38945	3.81879e-10	1.15254e-08
MED8	0.886954	3.82889e-10	1.155e-08
RNF219	1.17288	3.84061e-10	1.15752e-08
EMD	0.954664	3.8412e-10	1.15752e-08
C9orf117	1.55143	3.87018e-10	1.16459e-08
ATP6AP1	0.839381	3.87031e-10	1.16459e-08
HNRNPCP2	1.1753	3.87064e-10	1.16459e-08
COASY	0.940236	3.92427e-10	1.18012e-08
HDAC8	0.903205	3.94547e-10	1.18589e-08
PDCD2L	1.48164	3.94829e-10	1.18613e-08
TPM4	1.18893	3.95251e-10	1.1864e-08
ZNF131	1.22589	3.95324e-10	1.1864e-08
UCHL3	1.33977	3.95566e-10	1.18651e-08
MAD2L2	1.51004	3.97006e-10	1.19023e-08
SQLE	2.22224	3.97804e-10	1.19201e-08
TCF20	1.19239	3.98424e-10	1.19325e-08
PAK4	1.02741	3.99575e-10	1.19609e-08
MMP10	4.84337	3.9991e-10	1.19648e-08
APH1A	0.957958	4.01167e-10	1.19963e-08
IFT43	0.888412	4.01711e-10	1.20064e-08
ZNF107	1.63878	4.03199e-10	1.20448e-08
FAM96A	1.12189	4.05868e-10	1.21124e-08
UBL5	0.918703	4.05877e-10	1.21124e-08
CTD-2555C10.3	3.5347	4.07261e-10	1.21475e-08
FERMT1	2.64403	4.12779e-10	1.23059e-08
POLR1B	1.25438	4.13073e-10	1.23084e-08
RBM10	0.843993	4.13377e-10	1.23112e-08
WRNIP1	1.07649	4.15774e-10	1.23763e-08
RAB35	0.851037	4.17776e-10	1.24295e-08
ABCF3	0.947752	4.18103e-10	1.2432e-08
CCDC23	1.18079	4.18283e-10	1.2432e-08
PAPOLA	0.816495	4.18587e-10	1.24347e-08
AC245100.1	1.74303	4.20712e-10	1.24915e-08
ZNF280C	1.59712	4.21462e-10	1.24987e-08
PHKG2	0.962531	4.2152e-10	1.24987e-08
MRPL18	1.1227	4.21595e-10	1.24987e-08
ATF1	1.0251	4.24396e-10	1.25754e-08
RBM22	0.779154	4.25484e-10	1.26013e-08
PTDSS1	1.47401	4.27472e-10	1.26537e-08
CLIC1	1.34675	4.28978e-10	1.26919e-08
ANXA2P2	1.78236	4.32113e-10	1.27782e-08
AC004980.7	1.20506	4.34163e-10	1.28323e-08
MAP6D1	1.71495	4.35755e-10	1.28693e-08
IMP4	1.01489	4.35854e-10	1.28693e-08
HNRNPA3P6	1.51077	4.41276e-10	1.30169e-08
LRRC8D	1.41712	4.41295e-10	1.30169e-08
NFKBIE	1.81787	4.45946e-10	1.31474e-08
ASAP1	1.41749	4.52587e-10	1.33365e-08
STX12	-0.878915	4.62408e-10	1.36191e-08
FBXW9	1.18755	4.65101e-10	1.36915e-08
ISG20L2	1.07801	4.67107e-10	1.37436e-08
NAT9	1.14115	4.75639e-10	1.39877e-08
NRBP1	0.97627	4.7718e-10	1.40259e-08
AGRN	1.78051	4.82111e-10	1.41638e-08
PARL	1.11698	4.83388e-10	1.41942e-08
ZNF628	1.02391	4.88265e-10	1.43261e-08
GADD45GIP1	1.12953	4.8837e-10	1.43261e-08
RP11-598F7.6	3.0663	4.92602e-10	1.4443e-08
MVB12A	0.954801	4.95211e-10	1.45122e-08
[truncated: 56,582 more rows]
