# Supplementary material for: Genomic and clinical features of endoplasmic reticulum stress factor in digestive system pan-cancer studies
Source: Front Oncol. 2023 Jan 9;12:1072576. doi: 10.3389/fonc.2022.1072576 (PMC9868864; doi:10.3389/fonc.2022.1072576)
Supplement: Supplementary file 5 [file Table_5.xls]

## Sheet: TableS5 deg_res_PAAD_DEGs
gene	log2FC	pvalue	adjusted_pvalue
KRTAP21-4P	-3.04145	1.49582e-19	8.76267e-15
RP11-145E17.3	-1.71037	3.8101e-17	1.116e-12
AC006552.1	-3.32307	1.63766e-15	3.19785e-11
RP11-103J17.1	-3.03501	3.79451e-15	5.55715e-11
OR52P2P	-2.42802	5.13287e-14	2.07762e-10
RP11-521D12.2	-1.92427	5.58737e-14	2.07762e-10
CYP1D1P	-2.15229	8.17723e-14	2.07762e-10
RPS20P20	-3.46661	1.59792e-13	2.07762e-10
RNA5SP434	-3.52625	8.96786e-13	2.07762e-10
SCARNA14	-3.36285	8.96812e-13	2.07762e-10
AC018463.1	-3.13595	8.96855e-13	2.07762e-10
RNU2-37P	-2.92867	8.96903e-13	2.07762e-10
RNU1-136P	-2.89377	8.96912e-13	2.07762e-10
RNU1-19P	-2.88175	8.96915e-13	2.07762e-10
RP1-151B14.9	-2.77925	8.96944e-13	2.07762e-10
RNU1-146P	-2.63065	8.96992e-13	2.07762e-10
RP1-85D24.1	-2.58635	8.97008e-13	2.07762e-10
OSBPL9P5	-2.56347	8.97017e-13	2.07762e-10
SS18L2P1	-2.2349	8.97171e-13	2.07762e-10
RN7SKP121	-2.13382	8.97234e-13	2.07762e-10
CD24P2	-2.12397	8.9724e-13	2.07762e-10
CTD-2144E22.7	-2.1034	8.97254e-13	2.07762e-10
RP11-215I16.1	-2.0702	8.97278e-13	2.07762e-10
RPS21P8	-2.0702	8.97278e-13	2.07762e-10
IGHVIII-25-1	-2.0336	8.97305e-13	2.07762e-10
DYNLL1P5	-1.9929	8.97337e-13	2.07762e-10
RP5-1014O16.1	-1.97822	8.97349e-13	2.07762e-10
RP11-216P16.4	-1.94697	8.97376e-13	2.07762e-10
RP11-379J13.1	-1.94697	8.97376e-13	2.07762e-10
RN7SL443P	-1.93027	8.9739e-13	2.07762e-10
RN7SL87P	-1.93027	8.9739e-13	2.07762e-10
AC104843.4	-1.91277	8.97406e-13	2.07762e-10
ATP5G1P8	-1.91277	8.97406e-13	2.07762e-10
OR7E159P	-1.91277	8.97406e-13	2.07762e-10
RN7SKP206	-1.91277	8.97406e-13	2.07762e-10
RN7SL234P	-1.91277	8.97406e-13	2.07762e-10
RN7SL782P	-1.91277	8.97406e-13	2.07762e-10
RN7SL797P	-1.91277	8.97406e-13	2.07762e-10
HMGN1P11	-1.89435	8.97423e-13	2.07762e-10
IGHV3-42	-1.89435	8.97423e-13	2.07762e-10
IGLVV-58	-1.89435	8.97423e-13	2.07762e-10
RP11-118G23.2	-1.87497	8.97442e-13	2.07762e-10
CTD-2213F21.3	-1.85447	8.97462e-13	2.07762e-10
CTD-2616J11.15	-1.85447	8.97462e-13	2.07762e-10
RPL12P34	-1.85447	8.97462e-13	2.07762e-10
RPL36AP10	-1.85447	8.97462e-13	2.07762e-10
AC104308.2	-1.83272	8.97485e-13	2.07762e-10
CTD-2593A12.4	-1.8096	8.97509e-13	2.07762e-10
RP11-164P12.4	-1.8096	8.97509e-13	2.07762e-10
RPL31P33	-1.8096	8.97509e-13	2.07762e-10
RP11-321C24.1	-1.7849	8.97537e-13	2.07762e-10
RP11-191A15.4	-1.7849	8.97537e-13	2.07762e-10
AF238378.7	-1.7849	8.97537e-13	2.07762e-10
LINC00380	-1.7849	8.97537e-13	2.07762e-10
RP11-52B19.8	-1.7849	8.97537e-13	2.07762e-10
RP11-545E8.1	-1.7849	8.97537e-13	2.07762e-10
RP11-812E19.10	-1.7849	8.97537e-13	2.07762e-10
AC005094.2	-1.75835	8.97567e-13	2.07762e-10
CTD-2582M21.1	-1.75835	8.97567e-13	2.07762e-10
PHBP14	-1.75835	8.97567e-13	2.07762e-10
RP11-265D19.8	-1.75835	8.97567e-13	2.07762e-10
RP11-27G13.1	-1.75835	8.97567e-13	2.07762e-10
IGLVI-42	-1.72972	8.97602e-13	2.07762e-10
RP11-342M3.2	-1.72972	8.97602e-13	2.07762e-10
RP11-448N11.2	-1.72972	8.97602e-13	2.07762e-10
TMEM212-AS1	-1.6986	8.97642e-13	2.07762e-10
CYB5P4	-1.6986	8.97642e-13	2.07762e-10
RP11-167N24.3	-1.6986	8.97642e-13	2.07762e-10
RP11-196G18.1	-1.6986	8.97642e-13	2.07762e-10
RP11-432M8.10	-1.6986	8.97642e-13	2.07762e-10
RP11-77B22.1	-1.6986	8.97642e-13	2.07762e-10
RP11-9G10.1	-1.6986	8.97642e-13	2.07762e-10
RP5-998N21.3	-1.6986	8.97642e-13	2.07762e-10
RPL7AP61	-1.6986	8.97642e-13	2.07762e-10
TOMM22P6	-1.6986	8.97642e-13	2.07762e-10
RP1-29G21.1	-1.66455	8.97688e-13	2.07762e-10
RP11-138H8.3	-1.66455	8.97688e-13	2.07762e-10
RP11-196D18.1	-1.66455	8.97688e-13	2.07762e-10
RP11-27P7.1	-1.66455	8.97688e-13	2.07762e-10
RP11-433J8.2	-1.66455	8.97688e-13	2.07762e-10
RP11-598O12.1	-1.66455	8.97688e-13	2.07762e-10
BCAS2P3	-1.62695	8.97742e-13	2.07762e-10
CEND1P1	-1.62695	8.97742e-13	2.07762e-10
LINC00387	-1.62695	8.97742e-13	2.07762e-10
MTND4P18	-1.62695	8.97742e-13	2.07762e-10
RP11-12D5.5	-1.62695	8.97742e-13	2.07762e-10
RP11-69A21.2	-1.62695	8.97742e-13	2.07762e-10
RPL17P2	-1.62695	8.97742e-13	2.07762e-10
RPL23AP27	-1.62695	8.97742e-13	2.07762e-10
RPL23AP91	-1.62695	8.97742e-13	2.07762e-10
TPM3P4	-1.62695	8.97742e-13	2.07762e-10
RP11-960B9.2	-1.58497	8.97807e-13	2.07762e-10
AC113608.1	-1.58497	8.97807e-13	2.07762e-10
CTD-2019O4.1	-1.58497	8.97807e-13	2.07762e-10
LINC01066	-1.58497	8.97807e-13	2.07762e-10
RP1-60G11.1	-1.58497	8.97807e-13	2.07762e-10
RP11-339A11.1	-1.58497	8.97807e-13	2.07762e-10
RP11-358N4.5	-1.58497	8.97807e-13	2.07762e-10
RP11-529A4.9	-1.58497	8.97807e-13	2.07762e-10
RP11-556H2.4	-1.58497	8.97807e-13	2.07762e-10
RPL21P104	-1.58497	8.97807e-13	2.07762e-10
RPL22P5	-1.58497	8.97807e-13	2.07762e-10
RPL23AP44	-1.58497	8.97807e-13	2.07762e-10
RPL7AP69	-1.58497	8.97807e-13	2.07762e-10
TUBB8P3	-1.58497	8.97807e-13	2.07762e-10
RNMTL1P1	-1.53745	8.97888e-13	2.07762e-10
AC010146.1	-1.53745	8.97888e-13	2.07762e-10
CTB-187M2.1	-1.53745	8.97888e-13	2.07762e-10
CTD-2287N17.1	-1.53745	8.97888e-13	2.07762e-10
EEF1B2P5	-1.53745	8.97888e-13	2.07762e-10
LINC01442	-1.53745	8.97888e-13	2.07762e-10
MTND6P8	-1.53745	8.97888e-13	2.07762e-10
OR4D9	-1.53745	8.97888e-13	2.07762e-10
OR4H12P	-1.53745	8.97888e-13	2.07762e-10
OR8J3	-1.53745	8.97888e-13	2.07762e-10
RP11-266I3.5	-1.53745	8.97888e-13	2.07762e-10
RP11-407B7.3	-1.53745	8.97888e-13	2.07762e-10
RP11-419M24.2	-1.53745	8.97888e-13	2.07762e-10
RP11-685B13.2	-1.53745	8.97888e-13	2.07762e-10
RP3-333B15.6	-1.53745	8.97888e-13	2.07762e-10
RP5-1100I6.1	-1.53745	8.97888e-13	2.07762e-10
RP5-905H7.9	-1.53745	8.97888e-13	2.07762e-10
RPL18AP8	-1.53745	8.97888e-13	2.07762e-10
VN1R79P	-1.53745	8.97888e-13	2.07762e-10
AC012497.2	-1.4827	8.9799e-13	2.07762e-10
CTD-3051L14.14	-1.4827	8.9799e-13	2.07762e-10
GTF2IP8	-1.4827	8.9799e-13	2.07762e-10
HCG19P	-1.4827	8.9799e-13	2.07762e-10
MED28P4	-1.4827	8.9799e-13	2.07762e-10
OR13C8	-1.4827	8.9799e-13	2.07762e-10
PGBD4P6	-1.4827	8.9799e-13	2.07762e-10
RP11-12D5.4	-1.4827	8.9799e-13	2.07762e-10
RP11-135M8__A.1	-1.4827	8.9799e-13	2.07762e-10
RP11-334G8.1	-1.4827	8.9799e-13	2.07762e-10
RP11-40G16.1	-1.4827	8.9799e-13	2.07762e-10
RP11-493E3.3	-1.4827	8.9799e-13	2.07762e-10
RP11-586K12.10	-1.4827	8.9799e-13	2.07762e-10
RP3-446N13.2	-1.4827	8.9799e-13	2.07762e-10
RP4-633H17.2	-1.4827	8.9799e-13	2.07762e-10
RPS5P7	-1.4827	8.9799e-13	2.07762e-10
AC007251.2	-1.4181	8.98126e-13	2.07762e-10
AC073464.6	-1.4181	8.98126e-13	2.07762e-10
BSPH1	-1.4181	8.98126e-13	2.07762e-10
HMGB1P13	-1.4181	8.98126e-13	2.07762e-10
LINC00308	-1.4181	8.98126e-13	2.07762e-10
LINC01566	-1.4181	8.98126e-13	2.07762e-10
MTATP6P3	-1.4181	8.98126e-13	2.07762e-10
MTND2P7	-1.4181	8.98126e-13	2.07762e-10
MTND5P10	-1.4181	8.98126e-13	2.07762e-10
NPVF	-1.4181	8.98126e-13	2.07762e-10
OR2X1P	-1.4181	8.98126e-13	2.07762e-10
RP11-26C10.1	-1.4181	8.98126e-13	2.07762e-10
RP11-340I6.1	-1.4181	8.98126e-13	2.07762e-10
RP11-646J21.7	-1.4181	8.98126e-13	2.07762e-10
RP11-6B19.3	-1.4181	8.98126e-13	2.07762e-10
RP11-702C7.1	-1.4181	8.98126e-13	2.07762e-10
RP11-789C7.1	-1.4181	8.98126e-13	2.07762e-10
AC006296.1	-1.3394	8.9832e-13	2.07762e-10
CADM2-AS2	-1.3394	8.9832e-13	2.07762e-10
CARSP1	-1.3394	8.9832e-13	2.07762e-10
MARK2P5	-1.3394	8.9832e-13	2.07762e-10
MS4A13	-1.3394	8.9832e-13	2.07762e-10
MTCL1P1	-1.3394	8.9832e-13	2.07762e-10
NPAP1P7	-1.3394	8.9832e-13	2.07762e-10
NPM1P4	-1.3394	8.9832e-13	2.07762e-10
OR4C49P	-1.3394	8.9832e-13	2.07762e-10
PDHA2	-1.3394	8.9832e-13	2.07762e-10
PSMC1P6	-1.3394	8.9832e-13	2.07762e-10
RP1-273P12.1	-1.3394	8.9832e-13	2.07762e-10
RP11-12N13.4	-1.3394	8.9832e-13	2.07762e-10
RP11-211F2.1	-1.3394	8.9832e-13	2.07762e-10
RP11-475J5.8	-1.3394	8.9832e-13	2.07762e-10
RP11-500K19.1	-1.3394	8.9832e-13	2.07762e-10
RP11-572H4.1	-1.3394	8.9832e-13	2.07762e-10
RPL5P32	-1.3394	8.9832e-13	2.07762e-10
SQSTM1P1	-1.3394	8.9832e-13	2.07762e-10
VDAC1P12	-1.3394	8.9832e-13	2.07762e-10
VN1R65P	-1.3394	8.9832e-13	2.07762e-10
NMNAT1P5	-1.3394	8.9832e-13	2.07762e-10
NPM1P36	-1.3394	8.9832e-13	2.07762e-10
RP3-399L15.1	-1.23855	8.98624e-13	2.07762e-10
AGGF1P9	-1.23855	8.98624e-13	2.07762e-10
AKR1B1P4	-1.23855	8.98624e-13	2.07762e-10
ATF1P1	-1.23855	8.98624e-13	2.07762e-10
CTD-2320B12.2	-1.23855	8.98624e-13	2.07762e-10
GAPDHP26	-1.23855	8.98624e-13	2.07762e-10
GAPDHP50	-1.23855	8.98624e-13	2.07762e-10
GAPDHP53	-1.23855	8.98624e-13	2.07762e-10
GS1-115M3.3	-1.23855	8.98624e-13	2.07762e-10
HNRNPA1P32	-1.23855	8.98624e-13	2.07762e-10
HSPD1P15	-1.23855	8.98624e-13	2.07762e-10
KB-1568E2.1	-1.23855	8.98624e-13	2.07762e-10
MYCLP2	-1.23855	8.98624e-13	2.07762e-10
NEFMP1	-1.23855	8.98624e-13	2.07762e-10
OR10H4	-1.23855	8.98624e-13	2.07762e-10
OR10K2	-1.23855	8.98624e-13	2.07762e-10
OR10Q2P	-1.23855	8.98624e-13	2.07762e-10
OR13C6P	-1.23855	8.98624e-13	2.07762e-10
OR1D2	-1.23855	8.98624e-13	2.07762e-10
OR2T27	-1.23855	8.98624e-13	2.07762e-10
OR4A2P	-1.23855	8.98624e-13	2.07762e-10
OR4A7P	-1.23855	8.98624e-13	2.07762e-10
OR52A4P	-1.23855	8.98624e-13	2.07762e-10
OR5F2P	-1.23855	8.98624e-13	2.07762e-10
OR5H15	-1.23855	8.98624e-13	2.07762e-10
OR5I1	-1.23855	8.98624e-13	2.07762e-10
OR6C6	-1.23855	8.98624e-13	2.07762e-10
OR6V1	-1.23855	8.98624e-13	2.07762e-10
OR7E23P	-1.23855	8.98624e-13	2.07762e-10
RP11-56P9.6	-1.23855	8.98624e-13	2.07762e-10
RP11-583F24.6	-1.23855	8.98624e-13	2.07762e-10
RP11-585K14.2	-1.23855	8.98624e-13	2.07762e-10
RP11-846F4.5	-1.23855	8.98624e-13	2.07762e-10
VDAC2P1	-1.23855	8.98624e-13	2.07762e-10
VN1R64P	-1.23855	8.98624e-13	2.07762e-10
OR5AM1P	-1.23855	8.98624e-13	2.07762e-10
LINC00564	-1.09807	8.99195e-13	2.07762e-10
OR9K2	-1.09807	8.99195e-13	2.07762e-10
TRIM64DP	-1.09807	8.99195e-13	2.07762e-10
AC018880.1	-1.09807	8.99195e-13	2.07762e-10
AC068137.5	-1.09807	8.99195e-13	2.07762e-10
AC127383.1	-1.09807	8.99195e-13	2.07762e-10
CTBP2P3	-1.09807	8.99195e-13	2.07762e-10
CTD-2530H12.1	-1.09807	8.99195e-13	2.07762e-10
CTD-3145H4.1	-1.09807	8.99195e-13	2.07762e-10
EEF1A1P21	-1.09807	8.99195e-13	2.07762e-10
EHHADH-AS1	-1.09807	8.99195e-13	2.07762e-10
ERVWE2	-1.09807	8.99195e-13	2.07762e-10
IL6RP1	-1.09807	8.99195e-13	2.07762e-10
IRX1P1	-1.09807	8.99195e-13	2.07762e-10
OR4K15	-1.09807	8.99195e-13	2.07762e-10
RBM22P13	-1.09807	8.99195e-13	2.07762e-10
RP1-34P24.3	-1.09807	8.99195e-13	2.07762e-10
RP11-153K16.2	-1.09807	8.99195e-13	2.07762e-10
RP11-331K15.1	-1.09807	8.99195e-13	2.07762e-10
RP11-450I1.4	-1.09807	8.99195e-13	2.07762e-10
RP11-946L20.1	-1.09807	8.99195e-13	2.07762e-10
SLC6A6P1	-1.09807	8.99195e-13	2.07762e-10
TARDBPP1	-1.09807	8.99195e-13	2.07762e-10
RP11-544P1.3	-0.86485	9.00832e-13	2.07762e-10
AP000469.2	-0.86485	9.00832e-13	2.07762e-10
C16orf97	-0.86485	9.00832e-13	2.07762e-10
C18orf63	-0.86485	9.00832e-13	2.07762e-10
DPP3P1	-0.86485	9.00832e-13	2.07762e-10
KCNIP4-IT1	-0.86485	9.00832e-13	2.07762e-10
LINC00558	-0.86485	9.00832e-13	2.07762e-10
PRR20C	-0.86485	9.00832e-13	2.07762e-10
RP11-107P7.6	-0.86485	9.00832e-13	2.07762e-10
RP11-313I2.5	-0.86485	9.00832e-13	2.07762e-10
RP11-342F21.1	-0.86485	9.00832e-13	2.07762e-10
RP11-56P9.10	-0.86485	9.00832e-13	2.07762e-10
RP11-73B2.7	-0.86485	9.00832e-13	2.07762e-10
RP3-333B15.4	-0.86485	9.00832e-13	2.07762e-10
SPATA31D2P	-0.86485	9.00832e-13	2.07762e-10
OR51G1	-0.619275	9.04939e-13	2.07891e-10
OR5AK3P	-3.43707	1.54841e-12	3.54325e-10
OR5AP2	-2.40349	2.80604e-11	6.39613e-09
RNU4ATAC	-6.73412	1.99849e-10	4.53773e-08
OR11J2P	-2.39721	3.04986e-10	6.89822e-08
RP11-822E23.4	-3.58347	3.77514e-10	8.50582e-08
IGHVIII-76-1	-3.67731	4.18589e-10	9.39517e-08
RP11-106E7.1	-3.90306	6.1664e-10	1.37876e-07
OR5AK1P	-3.23262	6.56632e-10	1.46259e-07
RP11-79E3.1	-3.2487	1.28513e-09	2.85168e-07
FP236383.6	-5.19313	2.17099e-09	4.79919e-07
MRPL35P4	-2.72328	3.11628e-09	6.86296e-07
LINC01111	-2.85104	3.67777e-09	8.06919e-07
MISP	4.76911	4.00296e-09	8.7499e-07
KYNUP1	-2.13194	4.24606e-09	9.24678e-07
LINC01153	-1.32007	6.83738e-09	1.47801e-06
PMCHL1	-1.32007	6.83738e-09	1.47801e-06
RP11-60C6.6	-2.23847	8.46118e-09	1.8223e-06
RP5-1106E3.1	-2.62853	8.55228e-09	1.83517e-06
RP11-59J16.2	-1.64001	8.79458e-09	1.88028e-06
RP11-613H2.1	-2.41087	9.9446e-09	2.11842e-06
RP11-542M13.1	-2.48175	1.45252e-08	3.08297e-06
RP11-472N19.3	-2.77612	1.51472e-08	3.20338e-06
RP6-127F18.2	-1.56044	1.58527e-08	3.34053e-06
OR7G2	-1.21922	1.74601e-08	3.61425e-06
RP11-321E2.2	-1.21922	1.74601e-08	3.61425e-06
RP11-386B13.3	-1.21922	1.74601e-08	3.61425e-06
RP11-598O8.1	-1.21922	1.74601e-08	3.61425e-06
SAPCD2P2	-1.21922	1.74601e-08	3.61425e-06
RP11-565F19.4	-4.20644	2.33362e-08	4.81359e-06
IGKV2OR2-10	-2.71502	2.41625e-08	4.96653e-06
RN7SL47P	-3.55835	2.84311e-08	5.82351e-06
LPP-AS1	-3.39014	2.99366e-08	6.11051e-06
RP4-815D20.1	-1.67523	3.05602e-08	6.21614e-06
OR6K2	-1.45816	3.62836e-08	7.35476e-06
DDX18P6	-1.65239	3.86167e-08	7.8007e-06
RP11-438F14.10	-1.84329	4.73469e-08	9.53138e-06
GOLT1A	3.97272	4.95852e-08	9.94779e-06
RP11-627H22.6	-1.39356	6.39618e-08	1.27882e-05
AC093230.2	-3.06818	6.539e-08	1.30293e-05
B3GNT3	4.54611	7.85355e-08	1.5448e-05
GDI2P1	-1.07875	7.96386e-08	1.5448e-05
LINC01375	-1.07875	7.96386e-08	1.5448e-05
MTND4P10	-1.07875	7.96386e-08	1.5448e-05
MTND5P19	-1.07875	7.96386e-08	1.5448e-05
RP11-1081L13.3	-1.07875	7.96386e-08	1.5448e-05
RP11-24P4.1	-1.07875	7.96386e-08	1.5448e-05
ZNF735	-1.07875	7.96386e-08	1.5448e-05
GSTM5P1	-3.74979	1.06503e-07	2.05909e-05
C1orf210	3.79807	1.06947e-07	2.06087e-05
RP11-192C21.1	-3.8228	1.07629e-07	2.06722e-05
RP11-57G22.1	-2.27773	1.11382e-07	2.13231e-05
FXYD3	4.51275	1.30184e-07	2.48414e-05
NRBF2P1	-1.31486	1.33985e-07	2.54837e-05
MTND5P5	-2.09453	1.43203e-07	2.71488e-05
PPP1R2P5	-1.45502	1.71188e-07	3.21422e-05
RP11-344L21.1	-1.45502	1.71188e-07	3.21422e-05
RPS2P25	-1.45502	1.71188e-07	3.21422e-05
RP11-439A17.5	-3.17823	1.85346e-07	3.46894e-05
SLC25A6P2	-2.75735	1.9914e-07	3.68238e-05
RP11-292E2.4	-1.55504	1.99265e-07	3.68238e-05
CEACAMP7	-1.55504	1.99265e-07	3.68238e-05
CTD-2230M5.3	-1.55504	1.99265e-07	3.68238e-05
FAM47A	-1.64718	2.02945e-07	3.73859e-05
IGHVII-51-2	-2.23334	2.08275e-07	3.82475e-05
AC007255.8	3.61161	2.12612e-07	3.8922e-05
KRT126P	-1.63286	2.21679e-07	4.04554e-05
RP11-38C18.3	-1.75054	2.56223e-07	4.66142e-05
AGR2	6.21627	2.66744e-07	4.83782e-05
RP3-453I5.2	-2.05224	2.69719e-07	4.86855e-05
IGHVIII-47-1	-1.79731	2.70101e-07	4.86855e-05
RNU4-46P	-6.06699	2.79057e-07	5.01455e-05
C21orf91-OT1	-3.92298	2.93357e-07	5.2554e-05
RNA5SP145	-3.58035	2.97091e-07	5.29856e-05
RPL18AP15	-1.50752	2.97576e-07	5.29856e-05
AC114752.3	-1.66547	3.05369e-07	5.41292e-05
AC092638.1	-1.39042	3.07694e-07	5.41292e-05
RP11-2C7.1	-1.39042	3.07694e-07	5.41292e-05
RP11-398C13.2	-1.39042	3.07694e-07	5.41292e-05
IQCF2	-1.72399	3.1225e-07	5.47662e-05
RARRES2P3	-1.81812	3.26395e-07	5.70762e-05
LINC01307	-2.04579	3.3307e-07	5.80702e-05
OR5R1	-0.962136	3.46221e-07	6.01839e-05
ISCA1P6	-5.07637	3.52187e-07	6.10398e-05
OR10J7P	-1.21401	3.75188e-07	6.27968e-05
OR51D1	-1.21401	3.75188e-07	6.27968e-05
OR9G3P	-1.21401	3.75188e-07	6.27968e-05
RP11-104D21.1	-1.21401	3.75188e-07	6.27968e-05
RP11-24M17.5	-1.21401	3.75188e-07	6.27968e-05
RP11-265D19.7	-1.21401	3.75188e-07	6.27968e-05
RP11-321E2.7	-1.21401	3.75188e-07	6.27968e-05
RP11-323A7.1	-1.21401	3.75188e-07	6.27968e-05
RP11-43P5.3	-1.21401	3.75188e-07	6.27968e-05
RP11-692E14.1	-1.21401	3.75188e-07	6.27968e-05
SERBP1P4	-1.21401	3.75188e-07	6.27968e-05
RP11-335L23.2	-1.21401	3.75188e-07	6.27968e-05
RP11-1144P22.1	-2.53237	3.85346e-07	6.43132e-05
ARHGAP22-IT1	-1.69537	3.87918e-07	6.45586e-05
PIGQP1	-1.63142	3.99107e-07	6.60455e-05
AC000362.1	-1.63142	3.99107e-07	6.60455e-05
RP11-480N24.3	-3.52093	4.26241e-07	7.03369e-05
HMGN2P27	-3.68961	4.52795e-07	7.45089e-05
CTD-2141G3.1	-2.09466	4.71401e-07	7.73533e-05
RP11-158L12.5	-1.45277	4.80726e-07	7.86632e-05
RP11-110G21.2	-3.60883	5.27352e-07	8.60523e-05
SLC25A6P3	-2.4213	5.29344e-07	8.61375e-05
RP11-555E9.1	-1.59382	5.40138e-07	8.73376e-05
RPL21P107	-1.59382	5.40138e-07	8.73376e-05
TTTY7	-2.35544	5.41191e-07	8.73376e-05
RP11-278L15.7	-1.7724	6.10882e-07	9.83135e-05
OR56A4	-1.49359	6.19742e-07	9.94661e-05
OR10H3	-1.50576	6.33576e-07	0.000100857
RP11-142G1.3	-1.50576	6.33576e-07	0.000100857
RP11-31H15.2	-1.50576	6.33576e-07	0.000100857
AKR1B1P6	-1.31172	6.55237e-07	0.000102907
AP000459.7	-1.31172	6.55237e-07	0.000102907
MTHFD2P5	-1.31172	6.55237e-07	0.000102907
RP11-94M14.3	-1.31172	6.55237e-07	0.000102907
VENTXP5	-1.31172	6.55237e-07	0.000102907
RP11-299P2.1	-2.15073	6.67046e-07	0.000104482
TUBB4BP3	-1.95146	7.12036e-07	0.000111231
CRIP1P4	-2.1079	7.29903e-07	0.000113719
AC104781.1	-1.66318	7.38569e-07	0.000114461
RP11-190J23.1	-1.66318	7.38569e-07	0.000114461
ERICH2	3.03629	7.498e-07	0.000115678
RN7SL292P	-1.96508	7.50373e-07	0.000115678
PIGCP2	-1.55184	7.63814e-07	0.000117133
RP11-50O21.1	-1.55184	7.63814e-07	0.000117133
SNRPGP18	-2.18047	8.64916e-07	0.000132017
RP11-169L17.3	-1.38817	8.6763e-07	0.000132017
RP11-384D10.1	-1.38817	8.6763e-07	0.000132017
LINC00365	5.0642	8.8597e-07	0.000134459
RP11-57B24.2	-1.72115	8.94059e-07	0.000135336
BLACE	-2.72438	9.13646e-07	0.000137941
SPATA31A6	-2.30255	9.1598e-07	0.000137941
RP11-713C19.1	-1.74694	9.58635e-07	0.000143988
RP11-287J9.1	-1.83509	9.62749e-07	0.000143988
SNRPCP18	-1.62913	9.65964e-07	0.000143988
SPANXN4	-1.62913	9.65964e-07	0.000143988
OR5A1	-1.43884	1.00288e-06	0.000149111
RP11-265D20.1	-2.13291	1.00583e-06	0.000149171
HMGB3P11	-1.45101	1.02456e-06	0.000149415
LCE6A	-1.45101	1.02456e-06	0.000149415
RNASE12	-1.45101	1.02456e-06	0.000149415
RP11-272D20.2	-1.45101	1.02456e-06	0.000149415
RP11-575C1.1	-1.45101	1.02456e-06	0.000149415
ZNF877P	-1.45101	1.02456e-06	0.000149415
AIG1P1	-2.81414	1.02533e-06	0.000149415
RP11-420H19.1	-1.66224	1.04433e-06	0.000151807
RN7SL507P	-1.87182	1.04907e-06	0.000152118
ENSAP1	-1.79343	1.06764e-06	0.000154428
AHCYP8	-2.19407	1.07789e-06	0.000155316
CTD-2199O4.4	-2.13266	1.07908e-06	0.000155316
PSG6	-2.19142	1.08409e-06	0.000155655
RP11-51E20.1	-2.01419	1.09188e-06	0.00015639
RN7SKP112	-1.81459	1.11369e-06	0.000159124
NDUFB11P1	-1.50432	1.14338e-06	0.000162027
RP11-272G22.3	-1.50432	1.14338e-06	0.000162027
RP11-292D4.2	-1.50432	1.14338e-06	0.000162027
CTC-265F19.3	-5.75044	1.14507e-06	0.000162027
RN7SKP58	-1.8534	1.19254e-06	0.000168337
RP11-69H14.6	-2.18217	1.22525e-06	0.00017254
RPL12P43	-1.55062	1.23488e-06	0.000173478
RP11-279E1.1	-1.77031	1.2631e-06	0.000177019
AJ003147.8	-1.59153	1.30724e-06	0.000182767
CTBP2P1	-2.03616	1.35658e-06	0.000189214
C7orf66	-1.62819	1.36539e-06	0.00018999
RP11-34P1.4	-1.85291	1.39401e-06	0.000193513
RNU1-24P	-2.57273	1.51723e-06	0.00021012
GAPDHP29	-2.18626	1.75714e-06	0.000228808
IGKV2OR2-7	-2.21826	1.79503e-06	0.000228808
IGKV2OR2-7D	-2.21826	1.79503e-06	0.000228808
RN7SL419P	-3.563	1.80123e-06	0.000228808
B3GALNT2P1	-1.37424	1.80984e-06	0.000228808
CTA-125H2.2	-1.37424	1.80984e-06	0.000228808
SSX7	-1.37424	1.80984e-06	0.000228808
RP11-278I4.1	-1.76916	1.84634e-06	0.000228808
RP11-1396O13.22	-1.71906	1.84636e-06	0.000228808
RP11-680L20.1	-1.66064	1.8464e-06	0.000228808
RPL17P46	-1.50309	1.8465e-06	0.000228808
ELK1P1	-1.44957	1.84655e-06	0.000228808
RP11-52L11.6	-1.44957	1.84655e-06	0.000228808
MTND2P20	-1.38641	1.84661e-06	0.000228808
RP11-65B23.3	-1.38641	1.84661e-06	0.000228808
RP11-401E14.2	-1.30947	1.84669e-06	0.000228808
RP11-846F4.9	-1.30947	1.84669e-06	0.000228808
AC005772.2	-1.21087	1.84682e-06	0.000228808
OR2L9P	-1.21087	1.84682e-06	0.000228808
OR4B1	-1.21087	1.84682e-06	0.000228808
OR4C5	-1.21087	1.84682e-06	0.000228808
OR4K16P	-1.21087	1.84682e-06	0.000228808
OR5D18	-1.21087	1.84682e-06	0.000228808
OR8B2	-1.21087	1.84682e-06	0.000228808
SIAH1P1	-1.21087	1.84682e-06	0.000228808
OR7C2	-1.21087	1.84682e-06	0.000228808
RP3-492P14.2	-1.21087	1.84682e-06	0.000228808
VENTXP4	-1.21087	1.84682e-06	0.000228808
HNRNPA3P8	-1.07354	1.84707e-06	0.000228808
RP11-474J18.1	-1.07354	1.84707e-06	0.000228808
TUBB8P5	-1.07354	1.84707e-06	0.000228808
MSANTD2P1	-1.07354	1.84707e-06	0.000228808
CXorf66	-1.07354	1.84707e-06	0.000228808
OR51F1	-1.07354	1.84707e-06	0.000228808
ZNF679	-1.07354	1.84707e-06	0.000228808
RP11-332P22.2	-1.07354	1.84707e-06	0.000228808
MTND5P27	-1.07354	1.84707e-06	0.000228808
MTND5P7	-1.07354	1.84707e-06	0.000228808
RP11-208P4.1	-1.07354	1.84707e-06	0.000228808
SALL4P1	-1.07354	1.84707e-06	0.000228808
OR8K3	-0.95953	1.84736e-06	0.000228808
AC105342.1	-0.845524	1.84778e-06	0.000228808
RP11-165H23.1	-0.845524	1.84778e-06	0.000228808
RP11-104C4.2	-0.845524	1.84778e-06	0.000228808
RP11-19P22.5	-0.845524	1.84778e-06	0.000228808
RP11-400K9.2	-0.845524	1.84778e-06	0.000228808
RP11-517M22.1	-0.845524	1.84778e-06	0.000228808
RP11-554D14.1	-0.845524	1.84778e-06	0.000228808
SFPQP1	-0.845524	1.84778e-06	0.000228808
R3HDM2P2	-1.1999	1.86309e-06	0.000228808
DNAJA1P4	-1.1999	1.86309e-06	0.000228808
FLYWCH1P1	-1.1999	1.86309e-06	0.000228808
PES1P1	-1.1999	1.86309e-06	0.000228808
RP1-101G11.2	-1.1999	1.86309e-06	0.000228808
KB-1000E4.2	-3.15006	1.88573e-06	0.000231104
RP11-348J12.2	-4.4261	1.9341e-06	0.000236538
CTD-2568A17.8	-1.97511	2.00982e-06	0.000245285
MLPH	3.37239	2.14675e-06	0.000261453
RP11-14I17.2	-2.96444	2.34498e-06	0.000285002
RN7SKP213	-2.10367	2.40171e-06	0.000291293
RP11-22C11.2	2.81616	2.4072e-06	0.000291355
MTND1P6	-1.48837	2.50945e-06	0.000303105
RP11-45H22.2	-2.04634	2.52181e-06	0.000303971
RP11-627K11.3	-3.81154	2.71414e-06	0.000326482
C18orf12	-1.50203	2.75633e-06	0.000330879
CTD-2089O24.2	-1.64413	2.83404e-06	0.000339511
BCAS2P1	-1.44834	2.97493e-06	0.000355662
RN7SL660P	-1.86824	3.1666e-06	0.000377805
HIST1H2APS2	-3.3926	3.2362e-06	0.000385325
RP11-19O2.1	-1.38497	3.31604e-06	0.000393361
CKMT1A	3.3528	3.31712e-06	0.000393361
AC007405.6	2.89613	3.45326e-06	0.000408678
RP11-116B19.2	-3.62853	3.56912e-06	0.000421537
SMIM22	3.23192	3.59265e-06	0.000423463
RP11-498M14.1	-1.29554	3.83811e-06	0.000451487
UGT1A10	8.66228	3.858e-06	0.000452917
ATP5F1P6	-1.30771	3.90702e-06	0.000455931
RP11-293F5.8	-1.30771	3.90702e-06	0.000455931
AC010731.3	-1.30771	3.90702e-06	0.000455931
OR51F2	-1.43362	4.04018e-06	0.000470532
IFNA11P	-3.2875	4.28948e-06	0.000498575
NMU	6.3173	4.45403e-06	0.000516676
IGKV2-18	-5.06644	4.60501e-06	0.000533135
RN7SKP50	-3.61202	4.6987e-06	0.000542908
RP11-203I2.2	-1.20862	5.14712e-06	0.000590066
OR10U1P	-1.20862	5.14712e-06	0.000590066
OR52B1P	-1.20862	5.14712e-06	0.000590066
AP001605.4	-1.20862	5.14712e-06	0.000590066
U47924.27	3.63929	5.54638e-06	0.000634595
RP13-436F16.1	-2.81687	5.74544e-06	0.000656089
CDK5PS	-1.48523	5.77947e-06	0.000657412
DKFZp313A047	-1.48523	5.77947e-06	0.000657412
RPS2P39	-1.60832	5.82046e-06	0.000660791
OR5BQ1P	-2.18607	5.91008e-06	0.000668949
CTD-2269F5.1	4.5826	5.91516e-06	0.000668949
IRX5	4.29826	6.03496e-06	0.000681183
IL20RA	2.64297	6.18251e-06	0.000696496
SSU72P1	-1.44634	6.21401e-06	0.000698701
OR5G5P	-5.99928	6.30858e-06	0.000707975
RP11-481E4.1	-1.49949	6.78689e-06	0.000760197
RP11-313C15.1	-1.93837	6.90734e-06	0.000772212
RP11-366M4.13	-1.30627	6.96135e-06	0.000776767
RP1-261G23.7	3.85002	7.00144e-06	0.000779755
RP11-82H13.2	-5.83617	7.14882e-06	0.000794659
RP11-759A9.2	-1.60694	7.28388e-06	0.000808139
OVOL2	2.60639	8.48017e-06	0.000939087
EXTL2P1	-1.62265	8.70287e-06	0.00096193
NEUROD6	-1.0704	8.85605e-06	0.000971528
AC016908.1	-1.0704	8.85605e-06	0.000971528
CTD-2034I21.1	-1.0704	8.85605e-06	0.000971528
RP11-1109M24.15	-1.0704	8.85605e-06	0.000971528
EPCAM	2.619	8.90228e-06	0.00097226
SOX3	-4.3502	8.92846e-06	0.00097226
RP11-395C17.1	-1.05942	8.9789e-06	0.00097226
AC078842.4	-1.05942	8.9789e-06	0.00097226
MTND5P24	-1.05942	8.9789e-06	0.00097226
PMPCAP1	-1.05942	8.9789e-06	0.00097226
SPATA31E3P	-1.05942	8.9789e-06	0.00097226
RP11-96D24.1	-2.16154	9.05226e-06	0.000978395
CH507-145C22.2	-1.43048	9.23136e-06	0.000995916
RP11-406A20.4	-1.60853	9.54316e-06	0.00102766
RN7SL323P	-1.86427	9.57533e-06	0.00102923
OR4A8	-1.19469	1.05784e-05	0.00112671
PRR21	-1.19469	1.05784e-05	0.00112671
RP11-321E2.8	-1.19469	1.05784e-05	0.00112671
RP11-321E2.9	-1.19469	1.05784e-05	0.00112671
UBTFL7	-1.19469	1.05784e-05	0.00112671
IGHV3-37	-1.76334	1.06064e-05	0.00112765
SNAPC5P1	-3.71826	1.06604e-05	0.00112957
RP11-84H6.1	-2.85846	1.06631e-05	0.00112957
PRR23B	-1.28142	1.07283e-05	0.00113443
ESRP1	2.47691	1.14025e-05	0.00120355
RPL15P4	-1.69529	1.15869e-05	0.00122082
CBLC	4.08634	1.17286e-05	0.00123352
PPP1R11P2	-3.29138	1.22993e-05	0.00129025
LRRC31	7.00584	1.2312e-05	0.00129025
GHc-210E9.2	-1.78504	1.32542e-05	0.0013865
AC234582.1	5.82167	1.36533e-05	0.00142571
OR9I2P	-3.46177	1.42758e-05	0.00148806
CGN	2.74829	1.49497e-05	0.00155554
HIST1H2APS1	-3.45305	1.49896e-05	0.00155693
RPL23AP26	-2.88569	1.60231e-05	0.00166133
RP11-267L5.1	-1.36588	1.62739e-05	0.00168138
TUBB4BP7	-1.36588	1.62739e-05	0.00168138
RP11-684B2.5	-1.91935	1.64168e-05	0.00169315
AC113618.2	-1.8954	1.66044e-05	0.0017095
LINC00283	-1.99454	1.66698e-05	0.00171322
KRT18P67	-2.29801	1.79552e-05	0.00184209
RN7SL769P	-1.86176	1.81038e-05	0.00185409
MIR124-2HG	-2.53482	1.82163e-05	0.00186121
RP11-449H15.2	-2.02539	1.82369e-05	0.00186121
OR2M2	-1.20542	1.87983e-05	0.00191184
OR4F15	-1.20542	1.87983e-05	0.00191184
RP11-392L5.2	-1.55334	1.88338e-05	0.00191214
CNN2P3	-4.79879	1.93996e-05	0.00196316
RPL23AP56	-3.01991	1.94034e-05	0.00196316
OR5B21	-2.52064	1.95276e-05	0.00197232
RPL21P108	-1.99761	1.98104e-05	0.00199744
C1orf116	2.76059	1.99702e-05	0.0020101
RP11-799D4.3	-1.78499	2.01017e-05	0.00201986
RP11-375B1.2	-1.69208	2.13191e-05	0.00213851
RP11-882I15.1	-1.76414	2.1481e-05	0.00215107
RP11-570L15.2	-1.52511	2.19036e-05	0.00218965
HNRNPRP1	-3.51778	2.29779e-05	0.00229313
FAM90A27P	-2.81383	2.34475e-05	0.00233602
TSPAN1	3.61771	2.36544e-05	0.00235263
MNX1-AS1	3.00635	2.37029e-05	0.00235346
AL590226.1	-3.5271	2.41981e-05	0.00239856
RP11-274J2.1	-1.80679	2.63912e-05	0.00261152
RP4-801G22.2	-2.95338	2.67305e-05	0.00264064
U91324.1	-1.69086	2.68152e-05	0.00264454
KIF2B	-1.42796	2.70203e-05	0.00266029
ACTG1P21	-1.19155	2.79526e-05	0.00274747
CTD-2139B15.2	-1.36363	2.86001e-05	0.00280641
PRAMEF18	-1.18057	2.881e-05	0.00282228
OR6C65	-1.20419	2.94358e-05	0.00287876
RP11-187E13.1	4.85864	2.95774e-05	0.00288779
RP11-328J2.1	-2.34049	2.98789e-05	0.00291238
CTC-340A15.1	-1.56389	3.06816e-05	0.00298565
RBM43P1	-2.53229	3.12956e-05	0.00304034
RP11-297L17.2	6.23589	3.22251e-05	0.00312546
CHCHD2P5	-1.87151	3.29277e-05	0.00318832
SNX18P27	-1.28718	3.31137e-05	0.00320104
XRCC6P3	-1.27621	3.43243e-05	0.00331261
SMIM21	-2.67194	3.44331e-05	0.00331764
PRKRIRP2	-1.5892	3.50014e-05	0.00336686
PRR15L	2.78046	3.51148e-05	0.00337223
IFNWP18	-1.42503	3.58506e-05	0.00343726
BANF1P5	-2.13256	3.63165e-05	0.00347624
PHGR1	7.45268	3.6504e-05	0.00348849
IFNA2	-2.13475	3.66106e-05	0.00349297
RP11-12O16.1	-1.78183	3.77801e-05	0.00359869
OR8G7P	-1.30144	3.81989e-05	0.00363268
AC024132.1	-0.840312	3.8759e-05	0.00367997
POM121L10P	-2.62427	3.90466e-05	0.00370127
HMOX1	-2.05498	3.93793e-05	0.00371518
OR2Y1	-1.18947	3.95594e-05	0.00371518
RP11-259P15.3	-1.18947	3.95594e-05	0.00371518
OR5AP1P	-1.18947	3.95594e-05	0.00371518
SLC29A4P1	-1.18947	3.95594e-05	0.00371518
RP11-115A15.2	-1.78063	3.95737e-05	0.00371518
RP11-820K3.4	-4.28725	3.9877e-05	0.00373766
PKP3	2.74943	4.034e-05	0.00377501
CAPN8	4.63159	4.09828e-05	0.00382905
MTRNR2L5	-1.37766	4.11726e-05	0.00384065
IFITM8P	-1.65009	4.19115e-05	0.00390337
RP11-440D17.5	-1.52191	4.22234e-05	0.00391995
RP11-556O15.1	-1.52191	4.22234e-05	0.00391995
RNU2-36P	-2.31521	4.22991e-05	0.00392077
ACTG1P18	-1.3497	4.44924e-05	0.00411105
LINC01467	-1.3497	4.44924e-05	0.00411105
RN7SKP139	-1.83616	4.50829e-05	0.00415906
RN7SL754P	-3.6129	4.52124e-05	0.00416445
PERP	1.95505	4.54449e-05	0.00417206
COX4I1P1	-1.52188	4.56225e-05	0.00417206
RP4-682C21.5	-1.52188	4.56225e-05	0.00417206
AC105393.2	-1.47583	4.56511e-05	0.00417206
AKIRIN1P1	-1.47583	4.56511e-05	0.00417206
AC006028.11	-4.60667	4.60855e-05	0.00419876
RP11-571E6.1	-1.42333	4.60867e-05	0.00419876
OR4D5	-2.28279	4.64161e-05	0.0042222
IGLC4	-2.22653	4.68746e-05	0.00425181
RP13-150K15.1	-1.41116	4.70608e-05	0.00425181
HSPA8P6	-1.05421	4.73245e-05	0.00425181
RP11-756D7.2	-1.05421	4.73245e-05	0.00425181
SORCS3-AS1	-1.05421	4.73245e-05	0.00425181
TRIM51CP	-1.05421	4.73245e-05	0.00425181
KRT18P45	-1.05421	4.73245e-05	0.00425181
RCC2P5	-1.05421	4.73245e-05	0.00425181
FOXA2	3.26642	4.73948e-05	0.00425181
VN1R46P	-1.30075	4.75356e-05	0.00425793
SLC25A39P2	-3.7892	4.9404e-05	0.00441853
RPL12P18	-2.00821	4.96966e-05	0.00443792
RIPK4	2.23167	5.0526e-05	0.00450512
ASZ1	-3.27661	5.17915e-05	0.00461094
RP11-341G23.2	-1.89494	5.24388e-05	0.00466148
CTC-338M12.13	-3.83046	5.32583e-05	0.00472716
CTC-436K13.6	-2.25657	5.35968e-05	0.00474912
RP11-728L1.1	-1.18929	5.36724e-05	0.00474912
AC104651.2	-2.73115	5.37489e-05	0.00474912
RP11-382N13.6	-1.71228	5.45729e-05	0.00481466
CAPN9	5.68964	5.5356e-05	0.00487641
AC013437.4	-1.83483	5.54909e-05	0.00488095
ARHGEF16	2.28688	5.56795e-05	0.0048902
PDYN	-2.71795	5.70861e-05	0.0049899
MTND2P24	-1.28493	5.72213e-05	0.0049899
RP11-606P2.1	-1.28493	5.72213e-05	0.0049899
RPSAP42	-1.28493	5.72213e-05	0.0049899
REXO1L6P	-1.9305	5.72406e-05	0.0049899
RP11-479J7.1	-1.30011	5.78056e-05	0.00503166
CTC-543D15.1	-3.42527	5.9028e-05	0.00513045
JPH1	2.24971	5.93157e-05	0.00514781
FAM83E	3.86172	6.04239e-05	0.00523623
AC117947.1	-1.47439	6.0876e-05	0.00526762
PITX1	5.13571	6.12507e-05	0.00529222
HINT1P1	-3.32743	6.18717e-05	0.005338
RN7SKP8	-1.71152	6.20126e-05	0.0053423
TRBV7-5	-3.38943	6.33564e-05	0.00545005
AC114755.5	-1.68573	6.52458e-05	0.00559374
TMC4	2.22553	6.54799e-05	0.00559374
RP11-298D21.2	-1.28405	6.55997e-05	0.00559374
LINC01036	-1.28405	6.55997e-05	0.00559374
RP11-702F3.2	-1.28405	6.55997e-05	0.00559374
RPL7AP72	-1.28405	6.55997e-05	0.00559374
C2orf72	3.30468	6.79247e-05	0.00578357
RP11-767L7.2	-1.71059	7.17869e-05	0.00610356
BMF	-1.66811	7.19912e-05	0.00611206
RP11-494I9.1	-1.62776	7.29985e-05	0.00618263
RN7SKP75	-1.833	7.30336e-05	0.00618263
CIDEC	6.15048	7.35388e-05	0.00621642
RP11-379P1.4	-2.05374	7.5939e-05	0.00641006
ZCCHC13	-1.51934	7.69678e-05	0.00648756
RP1-278O22.2	-4.5511	7.75097e-05	0.00652384
RPS19P6	-1.59478	7.76554e-05	0.00652673
CTD-2538G9.6	-2.06254	7.84113e-05	0.00658082
AC115115.4	-1.98318	8.0071e-05	0.00670487
FRG2DP	-1.06494	8.04739e-05	0.00670487
LINC01490	-1.06494	8.04739e-05	0.00670487
RP11-67H2.1	-1.06494	8.04739e-05	0.00670487
C2orf54	3.3195	8.05487e-05	0.00670487
TTC39A-AS1	2.89994	8.05762e-05	0.00670487
SYT13	3.14526	8.18054e-05	0.00679751
CTD-3010D24.3	3.46233	8.19367e-05	0.00679877
RP11-30G8.1	-2.16115	8.31776e-05	0.00687862
RP11-725D20.1	-1.47263	8.32512e-05	0.00687862
RPL17P3	-1.47263	8.32512e-05	0.00687862
TMEM125	2.22983	8.39288e-05	0.00692483
LRRC30	-1.18633	8.46185e-05	0.00693292
OR4F14P	-1.18633	8.46185e-05	0.00693292
RCC2P8	-1.18633	8.46185e-05	0.00693292
OR1D3P	-1.18633	8.46185e-05	0.00693292
RP11-604N13.1	-1.18633	8.46185e-05	0.00693292
S100A5	3.55846	8.53856e-05	0.00698541
OR7E46P	-2.11228	8.54976e-05	0.00698541
CMBL	1.8653	8.57246e-05	0.00699199
RN7SL357P	-1.8319	8.58169e-05	0.00699199
RP11-626G11.5	5.56774	8.63991e-05	0.00702965
RP11-692C23.1	-1.17536	8.79659e-05	0.00714052
EEF1A1P36	-1.271	8.80056e-05	0.00714052
RP11-420B22.1	-2.66838	8.89013e-05	0.00720322
OC90	-1.77335	9.0034e-05	0.00728283
PLXNA2	1.48965	9.01635e-05	0.00728283
CDK2AP2P3	-2.32184	9.02568e-05	0.00728283
NQO1	2.90568	9.06409e-05	0.00730376
RPL7P56	-3.66694	9.09083e-05	0.00731525
STEAP2	1.66756	9.21457e-05	0.00740465
RN7SL126P	-1.83138	9.24516e-05	0.0074125
ERN2	6.56061	9.24965e-05	0.0074125
ATP5HP1	-1.41964	9.3273e-05	0.00744914
RP11-432M8.9	-1.41964	9.3273e-05	0.00744914
RP11-1114A5.6	-1.51785	9.33352e-05	0.00744914
ASNSP1	-3.03609	9.37437e-05	0.00747157
SPDEF	4.49061	9.45682e-05	0.00752704
LIN28A	-2.5029	9.50399e-05	0.00755432
TMEM151A	3.65537	9.59255e-05	0.0076097
MTND6P3	-2.87567	9.59965e-05	0.0076097
AC104306.4	-1.73229	9.67568e-05	0.00765961
RP11-345E19.2	-1.41932	9.74338e-05	0.00770279
RP13-635I23.3	-1.55746	9.76857e-05	0.00770934
RP11-233G1.4	-1.70866	9.77798e-05	0.00770934
RNU6ATAC24P	-3.00186	9.82838e-05	0.00773866
RP11-354P11.2	-4.09207	9.84612e-05	0.00774222
PRDM12	3.91129	9.97052e-05	0.00782953
ZNF652P1	-1.34449	9.99432e-05	0.00783771
CTD-2021H9.1	-2.66718	0.000100154	0.00784374
AC104667.3	2.53379	0.000101825	0.00796394
RP11-211G23.2	7.56301	0.000104289	0.00814584
CELF2-AS2	-1.28179	0.000105532	0.00821008
PRAMEF17	-1.28179	0.000105532	0.00821008
RPS3AP50	-1.28179	0.000105532	0.00821008
OR7E155P	-2.41631	0.00010638	0.00826503
RP11-862P13.1	-1.47118	0.000107229	0.00831996
MYOD1	-1.78493	0.000108334	0.00839461
AC007389.2	-1.81244	0.000111233	0.00860788
RPL12P23	-1.51642	0.000112271	0.00867674
LINC00658	-3.88613	0.000114788	0.00885957
RP1-154J13.2	-1.63898	0.00011633	0.00896678
KB-1183D5.16	-1.57701	0.000117043	0.00900988
RPPH1	-3.81663	0.00011756	0.00903775
OR4G4P	-1.28173	0.0001195	0.00916284
VN1R71P	-1.28173	0.0001195	0.00916284
RP1-66H9.1	-1.68186	0.000119703	0.00916647
DCAF8L2	-1.9567	0.000120156	0.00918911
RP11-425I13.2	-1.55611	0.000120447	0.00919938
RP11-442N1.2	-1.0401	0.000121695	0.00924647
OR12D3	-1.0401	0.000121695	0.00924647
PKMP2	-1.0401	0.000121695	0.00924647
SPATA31D4	-1.0401	0.000121695	0.00924647
TFF1	7.62744	0.00012204	0.00926063
ISCA1P2	-1.47034	0.000126037	0.0095516
KYNUP3	-1.41788	0.000126587	0.00958086
RP11-107C10.1	-1.75248	0.000128755	0.0097219
RP5-884M6.1	6.16976	0.000128782	0.0097219
REXO1L1P	-1.98899	0.000130332	0.00982621
RP11-115P21.1	-1.82787	0.000130654	0.00983786
RAB25	2.91344	0.000134555	0.0101079
MYH14	2.49143	0.000134586	0.0101079
FAM83A	6.44177	0.000135188	0.0101401
DNAJC19P7	-1.73007	0.000137022	0.0102591
PASD1	-2.25279	0.000137124	0.0102591
AC019178.2	-1.59117	0.000139571	0.0104289
RP11-304L19.3	3.02577	0.000140273	0.0104679
RNA5SP187	-3.29281	0.000140583	0.0104777
CTB-35F21.2	-2.95502	0.000141257	0.0105146
CTC-311G1.1	-1.18408	0.000142315	0.0105585
OR10S1	-1.18408	0.000142315	0.0105585
RPL31P60	-1.68072	0.000142533	0.0105585
MS4A8	4.48116	0.000142709	0.0105585
OR6U2P	-1.19926	0.000142748	0.0105585
RP11-379J5.5	-2.12168	0.000145548	0.010752
AC010880.1	-1.68051	0.000146045	0.0107751
NAGK	-0.93304	0.000149157	0.0109909
RN7SKP217	-1.72928	0.000150002	0.0110393
OR5AN2P	-1.28003	0.000151183	0.0111122
VN1R104P	-1.85678	0.00015718	0.011515
RP11-416I2.1	3.48518	0.000157225	0.011515
RP11-399K21.5	-1.99962	0.000159278	0.011515
CTD-2213F21.1	-1.66328	0.000159445	0.011515
RASSF4	-1.73924	0.000160156	0.011515
SERPINB5	5.71709	0.000160712	0.011515
C2orf70	2.89057	0.000160758	0.011515
ERBB3	2.38248	0.000161789	0.011515
RP11-542G1.3	-1.049	0.000162004	0.011515
RP11-959F10.5	-1.049	0.000162004	0.011515
RP3-449H6.2	-1.049	0.000162004	0.011515
FAM71B	-0.826197	0.00016203	0.011515
AC013269.5	-0.826197	0.00016203	0.011515
LINC00841	-0.826197	0.00016203	0.011515
LL22NC03-27C5.1	-0.826197	0.00016203	0.011515
RP11-17M15.1	-0.826197	0.00016203	0.011515
RP11-19N8.7	-0.826197	0.00016203	0.011515
RP11-382E9.1	-0.826197	0.00016203	0.011515
RP11-521H3.3	-0.826197	0.00016203	0.011515
RP11-560A15.6	-0.826197	0.00016203	0.011515
RP11-56L13.1	-0.826197	0.00016203	0.011515
RP11-586K12.4	-0.826197	0.00016203	0.011515
RP11-5A1.1	-0.826197	0.00016203	0.011515
RP11-760D2.11	-0.826197	0.00016203	0.011515
SALL1P1	-0.826197	0.00016203	0.011515
ZFRP1	-0.826197	0.00016203	0.011515
LIPA	-1.40965	0.000162056	0.011515
CLSTN2-AS1	-3.11794	0.000162275	0.011515
PSG1	-3.6541	0.000162363	0.011515
AC114760.1	-1.34135	0.000164263	0.0116356
RN7SKP95	-3.32929	0.000165586	0.0117151
RASGRP3	-1.73214	0.000165784	0.0117151
IL22	-2.92664	0.000167807	0.0118342
RP11-107I14.4	-2.21065	0.000167873	0.0118342
BAALC	-1.91542	0.000170012	0.0119705
RP11-25H11.1	-1.82537	0.000170429	0.0119855
GDPD5	-1.43269	0.000172071	0.0120864
RN7SL228P	-1.72821	0.000173987	0.0122061
RN7SL160P	-3.41564	0.000174191	0.0122061
PTPN3	1.59925	0.000175885	0.01231
RP11-574F11.3	-2.7082	0.000177233	0.0123896
RP1-60O19.2	-4.60556	0.000177717	0.0124086
RP11-2I17.1	-3.56265	0.000178026	0.0124154
SOWAHD	-1.98902	0.000178397	0.0124265
ANKS4B	4.37065	0.000181884	0.0126543
AP1M2	1.91304	0.000182241	0.0126641
NT5C3AP1	3.56146	0.000185368	0.0128662
RP11-386G21.2	-1.5132	0.000187781	0.0130182
HR	2.24398	0.000189961	0.0131538
RP11-351A20.1	-1.46768	0.000192449	0.0133103
RP11-544A12.5	-2.94282	0.000193192	0.013346
LL22NC03-80A10.11	-3.50387	0.000196072	0.013529
RP11-498M14.2	-1.4678	0.000196511	0.0135433
RP11-179H18.5	-2.84151	0.00019681	0.0135477
CD33	-2.18554	0.00019716	0.0135477
RSPH1	2.00775	0.000197269	0.0135477
RP11-254F19.3	-1.85354	0.000197845	0.0135714
ABI3	-1.72503	0.0002005	0.0137374
RP11-386D6.1	-1.27859	0.000201352	0.0137636
RP11-419C19.1	-1.27859	0.000201352	0.0137636
GOLGA5P1	-3.78907	0.000208299	0.0142219
CTC-339O9.2	-1.35328	0.000208652	0.0142294
RP11-669I1.1	-1.18232	0.000209844	0.0142941
RP11-797E24.3	-1.55271	0.000210231	0.0143038
TAB3-AS2	-1.94585	0.000213527	0.0145112
CTB-61M7.1	-1.04882	0.000214353	0.0145491
HMGB1P20	-2.98164	0.000214583	0.0145491
RP11-511B7.1	-1.17015	0.000214944	0.0145568
RP11-847H18.2	-1.40055	0.000216828	0.0146571
PSCA	7.25533	0.000216925	0.0146571
AC007557.1	-1.6208	0.000217451	0.0146757
RP11-128B16.3	-1.80684	0.000219053	0.0147668
MARVELD3	1.64397	0.000219648	0.0147899
RP11-512N21.1	-1.46711	0.000221203	0.0148775
CD5L	-5.07669	0.000224745	0.0150984
CHRNA5	2.47127	0.000226162	0.0151762
SPINK5	3.33746	0.000227198	0.0152198
TACC2	1.45729	0.000227332	0.0152198
RP11-524N5.1	-2.37233	0.000228415	0.0152749
NAP1L1P1	-1.51427	0.000229625	0.0153383
PARVG	-2.33267	0.000231116	0.0154203
EDDM3CP	-1.80608	0.000233913	0.0155892
FADS3	-1.36569	0.000235036	0.0156404
RN7SKP205	-1.78838	0.000235216	0.0156404
KRTAP10-11	-1.40049	0.000236534	0.0157102
RN7SL734P	-1.82436	0.000238549	0.0158261
PRAP1	5.89153	0.000239147	0.0158478
RN7SL638P	-1.74769	0.000245308	0.0162377
HNRNPA1P61	-3.76221	0.000248168	0.0164085
RPS15P9	-1.67695	0.000248528	0.0164138
PADI6	-2.60868	0.000250377	0.0165173
AC092646.2	-1.45129	0.00025189	0.0165984
CTD-2015H6.3	1.2261	0.000252297	0.0166065
CTD-2218K11.3	-1.72589	0.000252867	0.0166254
RP11-583F24.4	-1.18094	0.000253749	0.0166274
OR2AT2P	-1.18094	0.000253749	0.0166274
RP11-587P21.3	-1.18094	0.000253749	0.0166274
RPL9P15	-1.4659	0.000255444	0.0167197
LINC00388	-1.33821	0.000256066	0.0167231
PAICSP2	-1.33821	0.000256066	0.0167231
PGAM4P2	-1.35205	0.000257516	0.0167804
RP11-666G4.2	-1.35205	0.000257516	0.0167804
FLJ40288	-1.36674	0.000264855	0.0172394
RP11-278L15.2	3.85544	0.000266135	0.0173035
PCDH1	1.76304	0.000269871	0.0175269
CTA-929C8.5	-2.02192	0.000271247	0.0175968
SNORA76	-0.736408	0.000272454	0.0176556
LINC01222	-1.31626	0.00027739	0.0179555
RN7SL337P	-2.34579	0.000285662	0.0184706
CTD-2265D6.2	-2.22968	0.000286927	0.0185319
STX1A	2.11931	0.000287598	0.0185548
RP11-688G15.3	4.7496	0.000292108	0.0188251
MIR7515HG	-2.82954	0.000297267	0.0191365
RD3L	-1.96549	0.000301771	0.0194051
TUBAL3	4.27535	0.000303701	0.0195078
CKMT1B	2.56607	0.000307057	0.0197018
OR4K11P	-1.26265	0.000308405	0.0197524
AC111155.1	-3.19336	0.000308521	0.0197524
PPP1R14D	3.95121	0.000310056	0.0198291
FAM83H-AS1	2.40474	0.000313197	0.0200024
RP11-4N23.1	-2.81069	0.00031345	0.0200024
RP11-241F15.6	-1.52027	0.000314608	0.0200545
ACTG1P9	-1.7258	0.000315512	0.0200902
CTD-2313D3.1	-1.32516	0.000316223	0.0201079
FGR	-2.24421	0.000316477	0.0201079
XXbac-B33L19.10	-1.39742	0.000317995	0.0201825
LINC01114	-2.94783	0.00032166	0.0203767
RP11-552E20.4	-3.57029	0.00032175	0.0203767
ZIC2	6.13011	0.000323743	0.0204464
OR10G1P	-1.43616	0.000323804	0.0204464
RP11-244H18.4	-1.04586	0.000325294	0.0204464
OR2M3	-1.04586	0.000325294	0.0204464
RP11-97C18.1	-1.04586	0.000325294	0.0204464
AC010970.2	-1.04586	0.000325294	0.0204464
RP11-638L3.2	-1.04586	0.000325294	0.0204464
XXbac-BPG252P9.10	2.64276	0.000326999	0.0205315
RP11-27G24.1	-1.58545	0.000327744	0.0205563
RP11-284H18.1	-3.1753	0.000329484	0.0206433
PPIAP24	-1.55041	0.000330034	0.0206557
KIAA0922	-1.78453	0.00033097	0.0206922
CTD-2576F9.2	-1.51275	0.000332362	0.0207571
RP11-804F13.1	-1.92318	0.000336359	0.0209843
AC008265.2	-1.03488	0.000339728	0.021127
PPP1R26P2	-1.03488	0.000339728	0.021127
RP11-242F24.1	-1.03488	0.000339728	0.021127
RP11-108P20.2	-4.53955	0.000343683	0.0213502
RP11-340A13.1	-1.50951	0.000348756	0.0216045
RN7SL672P	-3.32844	0.000348824	0.0216045
RP11-61O11.1	-2.74609	0.000348881	0.0216045
KCNK1	2.23397	0.000352061	0.0217784
LILRB1	-2.29117	0.000352809	0.0218016
MARVELD2	1.68292	0.000353509	0.0218218
TMEM82	5.25757	0.000354939	0.0218871
GSTO2	1.67975	0.000356569	0.0219644
VN1R70P	-1.27511	0.000361121	0.02221
MATK	-2.13006	0.000361314	0.02221
MAGEB3	-1.16701	0.000366374	0.0224739
KRT18P47	-1.16701	0.000366374	0.0224739
RP11-501O2.5	-1.54869	0.000369827	0.022662
MUC13	3.9126	0.000371295	0.0227236
RP11-48D4.2	-1.44766	0.000371608	0.0227236
ETV4	2.15237	0.000379866	0.0232043
RP11-344B23.2	-1.90925	0.000381569	0.0232841
LINC01243	-1.34955	0.000382314	0.0233052
SNX10	-1.86952	0.000387704	0.0235893
RP11-548K23.11	-2.45261	0.00038778	0.0235893
OR12D2	-1.69525	0.000388801	0.0236265
TMEM45B	2.95439	0.000389197	0.0236265
PLA2G10	4.73907	0.000396546	0.0240477
RP11-447G11.1	-1.41091	0.000397973	0.0241093
RP4-657E11.10	2.82588	0.000399997	0.0242069
RNF128	2.53071	0.00040225	0.02431
FRMD4A	-1.32451	0.000402531	0.02431
CEACAM5	7.42332	0.000403408	0.0243179
AL365181.2	1.69238	0.000403493	0.0243179
DOK3	-1.88135	0.000404521	0.0243548
HBG1	-4.35733	0.000408122	0.0245464
KIF4CP	-1.42412	0.00041006	0.0246376
CTD-2527I21.15	4.21968	0.000429501	0.025775
RP4-668E10.4	-1.30214	0.000429869	0.025775
CDCA4P3	-1.70484	0.000435045	0.0260586
ARRB2	-1.19393	0.000438541	0.0262413
KRT15	3.51383	0.000440064	0.0262929
CASC8	4.25066	0.000440303	0.0262929
SNORA6	-5.53267	0.000446715	0.0265821
CTD-2014N11.2	-1.16494	0.000446959	0.0265821
GNAI2P2	-1.16494	0.000446959	0.0265821
OR2T2	-1.16494	0.000446959	0.0265821
LDLRAD1	3.53972	0.000450215	0.0267485
RNF166	-1.22442	0.000451171	0.0267781
RPL31P12	-3.05675	0.000451643	0.0267791
LINC01514	-1.42204	0.00046802	0.027722
CACNG3	-3.8517	0.000469572	0.0277859
RNU1-11P	-2.72094	0.000470436	0.0278089
RP11-1007I13.2	-1.25951	0.000470918	0.0278093
RN7SL771P	-3.29779	0.000472102	0.0278512
BAIAP2L2	2.9751	0.0004799	0.0282827
RP11-791O21.5	-1.62626	0.000484745	0.0285395
ADAP2	-1.55641	0.000488236	0.0287162
CDS1	1.62342	0.000491874	0.0289012
IGHV7-27	-1.74185	0.000495429	0.0290809
SPATA31C1	-2.86116	0.000496454	0.0291119
HCK	-2.04617	0.000501354	0.0293698
AQP6	3.6595	0.000508384	0.029726
AC106870.1	-1.33282	0.000508635	0.029726
CTA-407F11.8	-5.03182	0.000508957	0.029726
RP11-48F14.2	-3.30084	0.000510032	0.0297591
AGR3	5.02524	0.000510681	0.0297673
RP3-510L9.1	-2.33686	0.000513667	0.0299117
AC004987.10	-1.48981	0.0005173	0.0300805
RP11-329A14.2	-1.85547	0.000517593	0.0300805
EIF4EP5	-1.3934	0.000520296	0.0302076
NUDT19P4	-1.6105	0.000521076	0.0302229
GRAMD4P4	-1.5821	0.000526185	0.0304891
RP5-1061H20.5	-2.32317	0.000527115	0.0305128
AC004603.4	-1.72962	0.00052914	0.0305865
MYEOV	5.10032	0.000529434	0.0305865
ANXA13	4.13109	0.000531746	0.0306899
KEL	-2.85587	0.00054156	0.0312255
TPT1P12	-2.95517	0.000543137	0.0312856
OR2W2P	-2.17987	0.000544593	0.0313387
RP11-259P6.3	-1.51399	0.000558858	0.0321256
CTC-339F2.2	-4.17596	0.000559364	0.0321256
RP11-142L16.2	-1.82635	0.000560933	0.0321842
CD300A	-1.73515	0.000561638	0.0321931
PPL	2.19304	0.000565698	0.0323941
LINC00511	1.55953	0.00056946	0.0325777
NPM1P52	-2.3407	0.000571683	0.0326729
SIGLEC11	-3.12286	0.000573166	0.0327257
CTD-2527I21.4	-5.52224	0.00057548	0.0327935
RP11-650L12.2	2.27032	0.000575587	0.0327935
RP11-1018N14.3	-1.34712	0.000576124	0.0327935
RP11-428G5.1	-1.77908	0.000576591	0.0327935
AC019206.1	-4.1613	0.000577591	0.0328185
LINC01133	5.09734	0.000578853	0.0328583
OR2AP1	-1.17652	0.000580123	0.0328985
FOXA3	2.81248	0.000586061	0.0331726
OR8A2P	-1.04272	0.000586089	0.0331726
RN7SL124P	-4.90955	0.000588183	0.033259
DKK4	4.89673	0.000589395	0.0332954
BMP2K	-1.15998	0.000593406	0.0334897
RERG-AS1	-1.61305	0.000599691	0.0338118
CTD-2311B13.1	-1.46045	0.000601399	0.0338755
XDH	3.75285	0.000604179	0.0339995
PSG8	-3.82728	0.000607585	0.0341466
RP5-1173I20.1	-3.09896	0.000607959	0.0341466
IL34	-1.79057	0.000609937	0.0342248
KIF17	-1.67972	0.000611306	0.0342431
AP002856.7	-2.52577	0.000611432	0.0342431
CT45A9	-1.03175	0.000614051	0.0342588
PPP1R26P4	-1.03175	0.000614051	0.0342588
DIO2-AS1	-1.03175	0.000614051	0.0342588
ZNF716	-1.03175	0.000614051	0.0342588
RP11-59O6.3	-1.5946	0.000623252	0.0347197
TLCD1	1.4588	0.000623497	0.0347197
RP11-26E5.1	-1.99369	0.000626373	0.034843
LINC01180	-1.54885	0.000626901	0.034843
RP11-521M14.1	-2.75846	0.00062951	0.0349548
RP11-312P12.3	-1.65032	0.000630466	0.0349748
OR4F1P	-1.5792	0.000633767	0.0350993
KRTAP10-12	-1.58075	0.00063391	0.0350993
NXPE2P1	-1.33106	0.000635353	0.0351153
CTD-2272G21.2	-1.14192	0.000635397	0.0351153
OR3A4P	-1.25725	0.000636924	0.0351334
RP1-190J20.2	-1.25725	0.000636924	0.0351334
CNTD2	3.8585	0.000638788	0.035203
CMTM8	1.18646	0.000640229	0.0352347
SLC22A24	-1.02077	0.000640565	0.0352347
BAIAP2	1.40875	0.000643322	0.0353531
MTND4P32	-2.10537	0.000646374	0.0354689
RP11-1049A21.2	-1.56215	0.000646639	0.0354689
ABCA12	4.21279	0.000647258	0.0354696
CTD-2196E14.8	6.02955	0.000648242	0.0354903
SDR16C5	4.5546	0.000650661	0.0355895
RP3-455J7.3	-1.52671	0.000653439	0.0356771
KRT18P56	-1.4427	0.00065409	0.0356771
RP11-19J5.2	-1.4427	0.00065409	0.0356771
RPL7AP4	-2.27545	0.000655084	0.0356885
RP11-1029J19.4	4.81921	0.000655517	0.0356885
AC013467.1	-1.17549	0.000656194	0.0356922
RP4-609E1.2	-2.75149	0.000657592	0.035735
RP11-630D6.5	-2.26196	0.000665657	0.0360806
RP13-395E19.4	-0.820986	0.000666257	0.0360806
RP11-42H13.1	-1.60783	0.000666603	0.0360806
HIST1H2BPS3	-3.81869	0.000666803	0.0360806
PSG3	-3.59983	0.00066703	0.0360806
RP11-589C21.2	-1.48702	0.000668715	0.0361384
RP11-289A15.1	-3.3823	0.000670605	0.0362071
SCEL	4.92139	0.000672043	0.0362513
RP11-5K23.5	-1.52633	0.000673171	0.0362788
OR7E91P	5.77691	0.000674677	0.0363265
TRGV5P	-5.54829	0.000679605	0.0365583
RP11-368L12.1	5.4483	0.000682044	0.0366556
TOB1	1.47419	0.000682666	0.0366556
MYO9B	-1.02695	0.000686221	0.0367838
LINC00674	-1.87907	0.000687051	0.0367838
AP001604.3	-3.55809	0.000687653	0.0367838
LL22NC03-23C6.13	-1.25637	0.000688194	0.0367838
RP11-386G21.1	-1.25637	0.000688194	0.0367838
OR2Q1P	-1.1618	0.000696697	0.0371029
RP11-524L6.2	-1.1618	0.000696697	0.0371029
TAAR8	-1.1618	0.000696697	0.0371029
RP11-30M20.1	-1.1618	0.000696697	0.0371029
CRNDE	2.33112	0.000697859	0.037131
IQCA1-AS1	-2.90835	0.000700144	0.0372188
TRAF1	-1.52	0.000701156	0.0372278
RP11-1006G14.3	-1.83774	0.000701584	0.0372278
EEF1A1P28	-1.92788	0.000702852	0.0372613
LY86	-2.36573	0.000713139	0.0377725
SCARNA3	-3.15428	0.000723754	0.0382929
SPDYE12P	3.09463	0.000724271	0.0382929
STAC3	-1.40674	0.000725281	0.0383117
PLS1	2.31249	0.000728503	0.0384472
AC010240.3	-1.52593	0.000731553	0.0385717
RP11-304L19.1	3.06021	0.000732536	0.0385717
CYP2C9	4.71314	0.000732836	0.0385717
RP11-11A5.1	-1.34509	0.000735666	0.0386858
CYTH4	-1.76079	0.000738475	0.0387987
AC009474.1	-1.04185	0.000739549	0.0388204
SIGLEC7	-2.17913	0.000741426	0.038884
ANXA10	5.11131	0.000747661	0.0391759
RP4-725K1.1	-1.44147	0.000749242	0.0392237
RP11-939C17.4	-1.52527	0.000750347	0.0392465
GLOD5	2.5967	0.000751444	0.0392688
PSMC1P8	-1.02967	0.000762565	0.039779
DNAJB8-AS1	-1.02967	0.000762565	0.039779
RPS10P21	-1.50458	0.000766436	0.0399454
EEF1A1P19	-1.05594	0.000773834	0.0402951
RP3-323N1.2	-3.24013	0.000780772	0.0406203
RP11-395P13.4	-1.38971	0.000781934	0.0406446
FOXL1	3.10581	0.000786555	0.0408486
MSRB1P1	-1.67269	0.000793577	0.0411767
ITGAX	-2.06605	0.000797171	0.0413266
TMPRSS4	5.12007	0.000806319	0.0417639
AIF1	-1.82157	0.000807555	0.041791
IGHVII-30-1	-1.99931	0.000813459	0.0420593
RP11-141A19.1	-1.3288	0.000815893	0.042148
PPP1R36	1.66441	0.000821279	0.0423889
KRT19	3.29606	0.000825647	0.0425768
UBE2CP4	-2.57064	0.000828362	0.0426434
PLEK	-2.39956	0.000828395	0.0426434
CDH23	-1.52971	0.000830121	0.0426907
LAMA3	2.61262	0.000830771	0.0426907
S100P	5.32117	0.000834341	0.0428191
SNORA11B	-3.07908	0.000834732	0.0428191
RAB17	1.76547	0.000837452	0.0429211
RP1-144C9.2	-1.67205	0.00084112	0.0430714
KIR2DP1	-2.0108	0.000843835	0.0431727
RP11-244M2.1	3.17993	0.000845651	0.0432278
IGKV2-10	-1.67193	0.000848399	0.0433133
RP11-363G10.3	-2.65401	0.000848801	0.0433133
RNA5SP150	-3.3657	0.000856663	0.0436764
RP11-379K22.3	5.54363	0.0008737	0.044462
RP11-959F10.4	-2.57788	0.000873861	0.044462
UBTFL2	-1.05663	0.000874348	0.044462
MYO1F	-1.83544	0.000880676	0.0447449
RP11-669M16.1	-1.97964	0.000882885	0.0448183
AC010886.2	-2.84957	0.000887761	0.0450268
TM4SF5	4.183	0.00089298	0.0452523
FTH1P18	-1.43949	0.000904749	0.0458091
CH507-9B2.2	-3.42068	0.000907325	0.0458998
U82670.9	-3.91316	0.000916338	0.0463158
LPXN	-1.60108	0.000922326	0.0465783
AC084121.17	-1.47055	0.000923403	0.0465925
CHCHD2P1	-1.5231	0.000925296	0.0466429
RP5-965G21.4	2.57636	0.000925996	0.0466429
RP5-1158E12.3	5.68703	0.000927688	0.0466881
RP11-475A13.1	-1.92332	0.000930763	0.0468026
RP11-536C10.14	-1.43947	0.000933707	0.0469104
HNF4A	2.6464	0.00093554	0.0469622
MYOM3	2.75193	0.000936694	0.0469798
CLCA4	4.55016	0.000942683	0.0472398
CAMK2N1	1.52421	0.000949992	0.0475654
MTCO2P1	-1.48351	0.000955106	0.0477398
RP11-561I11.4	-1.48351	0.000955106	0.0477398
RN7SL169P	-1.8065	0.000962389	0.0480141
RP11-644L4.1	-3.02356	0.000962645	0.0480141
RP11-317G22.2	-1.79014	0.000963051	0.0480141
AADAC	4.30302	0.000970486	0.0483435
SPI1	-1.86065	0.000973889	0.0484719
TTN	-1.815	0.000974876	0.0484798
RP11-440G2.2	-1.54266	0.000977313	0.0485598
C19orf38	-1.6225	0.000980739	0.0486887
KMO	-2.25508	0.000998657	0.0495362
RP5-1160K1.3	-1.52226	0.00100478	0.049798
AC005235.1	-0.831717	0.00100925	0.0499772
RP11-628J14.1	-1.97922	0.00101301	0.0501111
LST1	-1.91101	0.00101367	0.0501111
MUC5AC	7.07859	0.00101671	0.0502192
TUFT1	1.50594	0.00101847	0.0502283
RPL21P67	-1.48296	0.00101861	0.0502283
RPS17P5	-1.58909	0.00102132	0.0503196
RP11-380M21.4	-1.82152	0.00102839	0.0506136
RP11-114H7.1	-1.32655	0.00102989	0.0506136
OR13F1	-1.15866	0.00103247	0.0506136
RP4-800O15.1	-1.15866	0.00103247	0.0506136
OR2W5	-1.15866	0.00103247	0.0506136
RP11-793H4.1	-1.15866	0.00103247	0.0506136
MAL2	2.19059	0.00103471	0.0506811
SNORA80B	-3.48245	0.00103693	0.0507218
RP5-1039K5.13	-5.41519	0.00103761	0.0507218
OR2AG1	-0.70581	0.00103814	0.0507218
RP5-961K14.2	-1.15986	0.00104364	0.0509481
LRRC25	-1.86153	0.00105978	0.0516928
AC104794.4	-1.75355	0.0010642	0.0518385
RP11-702C7.2	-1.3311	0.00106454	0.0518385
TAF13P2	-1.82084	0.0010684	0.0519833
RP11-117O7.2	-1.17292	0.00107136	0.0520411
RPS27P26	-1.96705	0.00107136	0.0520411
HNF1A	3.23867	0.00108025	0.0524295
RPL19P18	-1.73879	0.00108224	0.0524482
TFF2	6.9531	0.00108243	0.0524482
LILRA1	-2.49885	0.00108544	0.0525506
DNAJC19P6	-1.75321	0.00108783	0.052612
RBM17P2	-2.07254	0.0010885	0.052612
RP11-201E8.1	-1.67303	0.00109054	0.0526668
ZNF488	2.93933	0.00109347	0.0527651
MYADML	-2.42884	0.00109515	0.0527973
CTD-2187J20.1	-1.69203	0.00109594	0.0527973
RP11-456I15.2	-2.03762	0.00111657	0.0537467
LINC00311	-3.20471	0.00111842	0.0537917
CLRN3	3.66222	0.00112067	0.0538186
AC003985.1	-1.55626	0.00112197	0.0538186
RP4-673D20.5	-1.94614	0.00112256	0.0538186
CTC-379B2.4	-1.38648	0.00112266	0.0538186
TRG-AS1	-1.95307	0.00112548	0.0539023
CTD-2033D24.2	-4.5774	0.00112624	0.0539023
RP11-122L9.1	-1.38647	0.00113047	0.0540607
THEMIS2	-1.68338	0.00114644	0.0547458
RPS26P2	-3.31182	0.00114667	0.0547458
FAM99B	-2.24092	0.00114794	0.0547618
RP5-1004I9.1	-2.45694	0.00115107	0.0548257
DRD5P2	-2.20545	0.00115115	0.0548257
RP11-58O9.2	4.61921	0.00115237	0.054839
CTD-2012K14.2	-3.81745	0.00116245	0.0552644
TINAG	5.90976	0.00116319	0.0552644
GNGT2	-1.81944	0.00117665	0.0558586
RP11-368P15.2	-1.93468	0.00118037	0.0559898
AC019185.2	-1.8169	0.00118463	0.0561462
AP1B1	-0.717527	0.00118998	0.0563116
RPL7P51	-3.85372	0.00119063	0.0563116
ARAP1	-0.828984	0.001191	0.0563116
RP11-20G13.4	-4.92438	0.00119485	0.056448
ITGAD	-3.64135	0.00120231	0.0567546
RP11-693N9.2	-1.50203	0.00120381	0.0567797
RP11-45I20.1	-1.32511	0.00120498	0.0567892
LINC00628	3.81932	0.00120833	0.0569015
ADAM3B	-2.22034	0.00120941	0.0569029
OR7E25P	-1.15778	0.00121128	0.0569029
EEF1GP6	-1.15778	0.00121128	0.0569029
CARM1P1	-4.51214	0.00121843	0.0571932
IGHV3-30-2	-1.89236	0.00122773	0.0575724
OTOL1	-1.02653	0.00122848	0.0575724
PDCL3P1	-1.32479	0.00123513	0.0578379
NPL	-1.50245	0.00124281	0.0581508
FTH1P10	-1.33773	0.00124448	0.0581825
CCM2L	-1.56736	0.00124775	0.0582891
AC004019.10	-1.14561	0.00125406	0.058537
TNFAIP8L2	-1.92953	0.00125701	0.0586279
LINC01269	4.49948	0.00126757	0.0590735
HTR1D	2.77673	0.00128119	0.0596339
HNRNPMP2	-1.38474	0.00128163	0.0596339
MTND5P23	-1.01556	0.00128535	0.0597596
EPHX4	2.39543	0.00129366	0.060083
KLK7	6.40401	0.00129436	0.060083
MIR155HG	-2.00226	0.00129612	0.060117
SLC25A6P4	-4.34221	0.00130266	0.0603727
RP11-93O17.2	-2.50322	0.00131093	0.060708
ZDHHC9	1.07162	0.00131262	0.060738
MS4A7	-2.16353	0.00131495	0.0607981
RP11-563N6.6	-2.05874	0.00131814	0.0608974
SCIMP	-2.38014	0.00132558	0.0611928
XXbac-BPG181M17.6	-5.55701	0.00132882	0.0612942
WDR91	-1.03818	0.00135587	0.0624926
CYP2C19	5.36112	0.00136129	0.0626691
TRIM31	4.17887	0.00136184	0.0626691
VN1R9P	-1.1564	0.00136542	0.0627846
ATP6V0A4	3.63466	0.00136941	0.0629186
GGA2	-0.919479	0.00137271	0.0630209
EREG	4.79762	0.00138286	0.0634371
BTK	-2.31894	0.00138622	0.0635414
RP11-85L21.4	4.4724	0.00139267	0.0637874
RP11-640N11.2	-0.817847	0.00139962	0.0640556
EPS8L3	3.67774	0.00140114	0.0640753
CTB-159G17.3	-1.91002	0.00140811	0.0643436
PCMTD1P1	-1.66592	0.00141639	0.0646709
FUT2	2.32755	0.00141748	0.0646709
RP11-747D18.1	-1.14543	0.0014285	0.0651231
RP11-108N13.1	-1.25057	0.00143545	0.0653887
KIAA0226L	-2.03373	0.00143866	0.0654842
GAB3	-1.79953	0.00144366	0.0656609
RP11-404P21.6	-1.67672	0.00144659	0.065743
RNF144B	-1.28783	0.00145059	0.0658328
P2RX7	-1.82018	0.00146245	0.0658328
CCAT1	4.7122	0.00146282	0.0658328
OR13G1	-1.15552	0.00146684	0.0658328
OR4K14	-1.15552	0.00146684	0.0658328
RP11-744D14.2	-1.02446	0.00146688	0.0658328
RP11-438O11.1	-1.02446	0.00146688	0.0658328
CTB-95D12.1	-0.806871	0.00146701	0.0658328
PRR23C	-0.806871	0.00146701	0.0658328
AC079779.7	-0.806871	0.00146701	0.0658328
LINC00606	-0.806871	0.00146701	0.0658328
LINC01043	-0.806871	0.00146701	0.0658328
LINC01360	-0.806871	0.00146701	0.0658328
RP11-334E15.1	-0.806871	0.00146701	0.0658328
SBF1P1	-0.806871	0.00146701	0.0658328
ANKRD13A	-0.873152	0.00146894	0.0658328
TUBAP	-1.03812	0.00146907	0.0658328
OR12D1	-1.35687	0.00146992	0.0658328
KRTAP10-10	-1.35687	0.00146992	0.0658328
EPHB3	1.84582	0.00147256	0.0658503
ECE2	1.05417	0.00147256	0.0658503
ARHGAP17	-0.664851	0.00147397	0.065863
IGHV3-76	-1.78519	0.00148949	0.0664947
RNU2-63P	-4.1725	0.00149037	0.0664947
KLF5	2.41117	0.00150364	0.0669968
AC018799.1	-2.65081	0.00150429	0.0669968
TUB-AS1	-1.39852	0.00150506	0.0669968
FOXD1-AS1	5.20063	0.00151028	0.0671781
TTC6	4.28815	0.00152528	0.0677939
RP11-297B17.2	-1.58449	0.00153719	0.0682715
RN7SL288P	-1.80042	0.00154596	0.0686089
RP11-510I21.1	-1.23704	0.00155745	0.0690664
CH17-262O2.1	-3.29647	0.00156992	0.069567
OR5G1P	-1.51086	0.00157637	0.0697998
PTPN6	-1.07615	0.00157756	0.0697998
EVL	-1.49955	0.00160162	0.0707609
CSF3R	-2.15496	0.0016017	0.0707609
RP3-393E18.3	-2.36525	0.00160456	0.0707933
RN7SL678P	-2.19654	0.00160485	0.0707933
EMP2	1.38581	0.00160736	0.0708508
RN7SL65P	-1.7484	0.00161246	0.0710222
RP11-409O11.3	-1.32212	0.00162373	0.0714423
RP1-91J24.3	-2.57477	0.00162444	0.0714423
CTD-2319I12.2	-1.85291	0.00162782	0.0715376
CPLX3	-4.21184	0.0016353	0.0718121
VASH2	-1.54809	0.00163704	0.071835
FER1L6	5.67706	0.00164647	0.0721945
PLEKHO2	-1.25716	0.00165036	0.0723108
GM2A	-1.06261	0.00166207	0.0727698
AC003973.3	-2.27052	0.0016662	0.0728958
PCED1B-AS1	-2.08383	0.0016774	0.0733245
MTND2P31	-1.38243	0.0016785	0.0733245
NFAM1	-1.7373	0.00168087	0.0733423
RP11-982M15.6	2.65316	0.00168141	0.0733423
AP000997.1	-1.4784	0.00168735	0.0735468
KRTAP26-1	-1.15465	0.00169239	0.0736728
ASPHD1	1.79498	0.00169276	0.0736728
LEFTY2	-3.17876	0.00169454	0.0736941
NLRC4	-1.79147	0.00169577	0.0736941
WAS	-1.9516	0.00171791	0.0746013
RP11-381K20.4	-4.36565	0.00172058	0.0746617
PPP1R1C	2.17007	0.00172664	0.074869
OSTM1-AS1	-1.2985	0.00173266	0.0750283
RPL7P10	-2.26154	0.00173287	0.0750283
AKR1B10	4.78588	0.00174423	0.0754641
APOBR	-1.58864	0.00175828	0.076016
TRIM80P	3.02257	0.00176833	0.0763943
RP1-166H4.2	-1.70356	0.00178372	0.0770025
ABHD17C	1.90956	0.001786	0.0770403
RP11-78A19.2	-1.38124	0.00178776	0.0770403
FAM49A	-1.76207	0.00178855	0.0770403
ATG16L2	-1.43251	0.00179794	0.077388
RP11-313H3.1	-1.4611	0.00180226	0.0774664
LINC00460	3.88647	0.0018024	0.0774664
LILRP1	-4.12945	0.00181163	0.0778058
RFTN1P1	-2.18612	0.00181367	0.0778363
DRAXINP1	-1.40447	0.00182094	0.0780911
RP11-966I7.2	-1.03604	0.00182996	0.0784206
CTB-39G8.2	-4.0255	0.00183214	0.0784568
USH1C	2.86382	0.00183538	0.0785378
RNF103-CHMP3	5.68064	0.00184249	0.0787845
AOAH	-1.91567	0.00185088	0.0790841
CTD-2385L22.1	5.75199	0.0018522	0.0790841
RP11-615J4.4	-4.01014	0.00185747	0.0792517
RP11-114H7.2	-1.35493	0.00186613	0.0795633
CTD-2207O23.11	-1.79898	0.0018695	0.0796488
OR5AK2	-2.28368	0.00187566	0.0798239
SLC4A11	2.4155	0.00187698	0.0798239
CEACAM6	4.87393	0.0018777	0.0798239
F12	2.14964	0.00188502	0.0800107
RP11-109M19.4	-1.15327	0.00188513	0.0800107
RPS4XP12	-1.32093	0.00188619	0.0800107
COL17A1	4.79454	0.00190254	0.080607
DOCK8	-1.68524	0.001903	0.080607
RP11-810P12.5	-3.02512	0.00191249	0.0809504
FAM78A	-1.78381	0.00192238	0.0813074
LINC01477	-1.02507	0.0019237	0.0813074
RP11-319G6.3	-1.76385	0.00192646	0.0813654
PGAM1P10	-1.48494	0.00193261	0.0815663
RAB28P2	-1.30652	0.00193822	0.0817163
C1GALT1P2	-2.15924	0.00193895	0.0817163
MPC1L	-3.34579	0.00194354	0.0818506
NCKAP1L	-2.15716	0.00194979	0.0820125
RP11-523O18.7	-1.41597	0.00195018	0.0820125
CD52	-2.36203	0.00196754	0.0826264
LAPTM5	-1.80584	0.0019676	0.0826264
MAFG-AS1	1.1841	0.00196948	0.0826421
IGFLR1	-1.4523	0.00197079	0.0826421
AC074366.3	-4.10368	0.00197239	0.0826497
MANSC1	1.24178	0.00198192	0.0829899
HIST2H2BE	1.81085	0.00198486	0.0830538
RASGRP4	-1.61787	0.00199452	0.0833983
TMEM30B	1.47311	0.00199711	0.083447
RP11-541F9.2	-1.48736	0.00200149	0.0835705
AC096582.9	-1.41668	0.00200596	0.0836973
LINC00675	5.37371	0.00201268	0.0839179
CTD-2363C16.1	-1.60392	0.0020209	0.0842008
RBMXL3	-1.00144	0.00203414	0.084572
BRD7P6	-1.00144	0.00203414	0.084572
XKRY	-1.00144	0.00203414	0.084572
LCP1	-2.07813	0.00205092	0.0852091
RP5-1136G2.1	-2.68679	0.00205855	0.0854656
SASH3	-2.17946	0.0020611	0.0855109
SPATC1	-2.56407	0.0020687	0.0857656
RN7SL615P	-1.78115	0.00207266	0.0858687
SEZ6L2	1.37608	0.00207867	0.0860571
RENBP	-1.5522	0.00208101	0.0860928
MSLN	4.9603	0.00208573	0.0862273
DPP3P2	-1.28337	0.00208843	0.0862781
PALD1	-1.44329	0.00209176	0.0863485
HNRNPA1P48	-0.848475	0.00209308	0.0863485
RP11-511B23.2	4.34214	0.00210315	0.0867028
SETP6	-1.37946	0.00210803	0.0868427
KARSP1	-1.93653	0.00210964	0.0868481
LIMD2	-1.8377	0.00211418	0.0869737
MICAL1	-1.16944	0.0021165	0.0870084
CDHR5	3.52608	0.00212399	0.0872547
HLA-DQA2	-3.10753	0.00212719	0.0873253
ARHGEF38-IT1	5.60323	0.00214089	0.0877831
FOXQ1	3.03948	0.00214134	0.0877831
ESRP2	1.6399	0.00214842	0.0880116
RP11-383M4.6	-2.19608	0.00215204	0.0880985
WT1-AS_3	-5.02175	0.00215482	0.0881477
CH507-39O4.1	-3.10606	0.00215626	0.0881477
FAM83H	1.65471	0.00215786	0.0881517
SIGLEC9	-1.77953	0.00216987	0.0885032
LRP11	1.14494	0.00217172	0.0885032
RP11-341D18.6	-1.02132	0.00217251	0.0885032
OR2J2	-1.02132	0.00217251	0.0885032
RBPMSLP	-2.84842	0.00217627	0.0885949
PRAM1	-1.87285	0.00218324	0.0887557
RP11-74C1.4	4.83836	0.00218373	0.0887557
RNU1-13P	-2.68552	0.00218597	0.0887557
PIK3CD	-1.5873	0.00218628	0.0887557
CX3CR1	-2.43966	0.00220176	0.0893221
PHOSPHO1	-2.06107	0.00220536	0.0893964
SLC7A11	2.23911	0.00220664	0.0893964
RP11-49K24.9	-2.08116	0.002218	0.0897945
RPL17P25	-2.50651	0.00222225	0.0899043
CD36	-2.57099	0.00222796	0.0900734
RP11-436M15.3	-1.51299	0.0022306	0.0901178
LILRB2	-1.88652	0.00223266	0.0901389
TRAV40	-4.64331	0.00224634	0.0906288
LLNLR-276E7.1	-4.30747	0.00225079	0.0907123
ADRA1D	-2.41308	0.00225151	0.0907123
ECSCR	-2.73021	0.00226104	0.0910337
RP11-63K6.5	-0.815593	0.00226279	0.0910415
OR10N1P	-1.23183	0.00227452	0.0912129
LINC01552	-4.40415	0.00227553	0.0912129
PABPC1P6	-1.01035	0.00227599	0.0912129
RNF6P1	-1.01035	0.00227599	0.0912129
RP11-1127D7.1	-1.01035	0.00227599	0.0912129
IL18RAP	-1.99632	0.00227639	0.0912129
AC010153.3	-1.48277	0.00228243	0.0913888
RP11-356I18.1	-3.01891	0.0022839	0.0913888
OR4K2	-1.15151	0.00228756	0.0914728
RP11-570L15.1	-2.47905	0.00229103	0.0914943
CTA-286B10.7	-1.49608	0.00229326	0.0914943
LCE2B	-1.39699	0.00229435	0.0914943
RP11-674I16.1	-2.78166	0.00229501	0.0914943
SPIRE2	2.07578	0.00229645	0.0914943
RP13-225O21.5	-1.36347	0.00229747	0.0914943
RP11-177N22.2	-1.2813	0.00230225	0.0916222
ANKRD33B	-1.98821	0.00230491	0.0916657
PLCB2	-1.89841	0.00231087	0.0918405
LINC00958	4.64391	0.00231384	0.0918961
STEAP1	1.89603	0.00231813	0.0919817
IGLVI-56	-2.00016	0.00231913	0.0919817
ADGRE1	-2.46533	0.00232252	0.0920021
ARHGAP9	-1.93543	0.00232279	0.0920021
RP11-314M24.1	-3.82433	0.00233066	0.0922188
RP11-172F10.1	-1.31852	0.00233141	0.0922188
CDCP1	1.62839	0.00234659	0.092707
ADORA2B	1.80214	0.00234758	0.092707
PPY2P	-3.47726	0.0023485	0.092707
RP11-480I12.5	1.62695	0.00235341	0.0928386
RP5-1022P6.5	-1.45709	0.00236197	0.0931134
AC068042.1	-1.13933	0.00237634	0.0936141
AC011899.9	-1.65538	0.00237909	0.0936141
TM4SF4	3.64596	0.00238063	0.0936141
ELF3	2.35067	0.0023825	0.0936141
CYCSP2	-1.74125	0.00238401	0.0936141
C1QC	-1.91214	0.00238426	0.0936141
TLR1	-1.61841	0.00239082	0.0938089
PGGT1BP2	-3.14642	0.00239669	0.0939713
KRT82	-1.63438	0.00239837	0.0939713
AC009313.1	-1.47298	0.00239977	0.0939713
RP11-734K21.5	3.90423	0.00241496	0.0945029
NKAIN1P1	-2.90209	0.00241997	0.0946007
AHCYP3	-1.29329	0.00242069	0.0946007
EPB41L4B	1.81138	0.00242688	0.0947794
RP11-456J20.1	-1.47325	0.0024429	0.0953413
GPRC5A	3.87056	0.00244586	0.0953933
NAPSB	-2.41686	0.00247896	0.0966201
DOCK11	-1.33285	0.00248865	0.0969333
RP11-487I5.4	-1.68387	0.00250907	0.0976638
AC239868.2	4.56213	0.00252161	0.0980215
AC239868.3	4.56213	0.00252161	0.0980215
CARD9	-1.63999	0.00252908	0.0982149
GTF2IRD1	1.16599	0.00252994	0.0982149
FOXA1	3.08366	0.00253703	0.0984249
HSPBAP1	-0.790679	0.00254554	0.0986899
NCF4	-1.71107	0.0025658	0.0994096
CD53	-2.06211	0.00257233	0.099578
VTI1BP3	-1.36203	0.00257355	0.099578
DPEP2	-1.87899	0.00257614	0.0996113
LAIR1	-1.88938	0.00257904	0.0996113
CD72	-1.93067	0.00257951	0.0996113
CEACAM21	-1.97026	0.00258679	0.0998265
ALPI	5.50381	0.00258882	0.099839
AC099344.2	-1.34922	0.00259277	0.0999257
LSM3P4	-1.72198	0.00259657	0.0999811
MIR503HG	-1.89675	0.00259815	0.0999811
MUPP	-1.31692	0.00260008	0.0999811
LINC01400	-1.58675	0.00260103	0.0999811
ZNF645	-1.01017	0.00260404	0.100004
TMEM184A	1.71828	0.00260505	0.100004
RP11-548N1.1	-2.30517	0.00262212	0.100579
NUP62CL	1.56697	0.00262347	0.100579
ZNF519P3	-1.15092	0.00263068	0.10079
AFAP1-AS1	4.38158	0.00263514	0.100855
PTPRO	-1.84795	0.00263583	0.100855
OXER1	-1.41707	0.00263817	0.100879
RP11-30L3.2	-1.47207	0.00264281	0.100991
BAIAP2L1	1.59964	0.0026468	0.101077
LINC01595	-1.66675	0.00265962	0.101501
DNAH3	2.8569	0.00266591	0.101542
ALDOAP1	-1.13726	0.00267112	0.101542
HNRNPA1P60	-1.13726	0.00267112	0.101542
OR52I2	-1.13726	0.00267112	0.101542
DDX39AP1	-1.13726	0.00267112	0.101542
KRTAP1-3	-1.13726	0.00267112	0.101542
EFNA2	3.61379	0.00268676	0.102006
PDE7A	-1.4173	0.00268679	0.102006
RP11-486O13.3	-1.36122	0.00268979	0.102053
HIST1H2BD	1.92359	0.00269652	0.102243
RP11-98D18.2	-4.91324	0.00270314	0.102427
PIK3R6	-1.60507	0.00270695	0.102506
ITGAL	-2.29931	0.00271162	0.102616
HMGCS2	5.10603	0.00271345	0.102619
APBB1IP	-1.98945	0.00272095	0.102836
RP11-589C21.5	-2.91978	0.00272458	0.102907
RN7SKP255	-2.219	0.00275315	0.103919
RP11-736E3.1	-1.30201	0.00275552	0.103941
HCLS1	-1.83868	0.00276718	0.104314
HVCN1	-1.66956	0.00277652	0.104579
RP11-524F11.3	-2.90459	0.00277939	0.104579
PDX1	2.62553	0.00277956	0.104579
HOXA-AS3	3.89607	0.00279111	0.10493
CD180	-2.23101	0.00279247	0.10493
RP11-778H2.1	-1.5764	0.00281989	0.105863
HCST	-1.66512	0.00282092	0.105863
KDELR2	0.800184	0.00282965	0.10609
WBP1LP6	-1.73815	0.00283058	0.10609
ADAMTS10	-1.74223	0.00283373	0.10614
LRRC1	1.06357	0.00284844	0.106623
METTL15P3	-1.85961	0.00286489	0.10717
KRT18P9	-1.27816	0.00287528	0.107421
PAICSP3	-1.27816	0.00287528	0.107421
RPL14P5	-0.650563	0.00288247	0.107619
C1QB	-1.94772	0.00288425	0.107619
SNX18P5	-2.50817	0.00289162	0.107806
RP11-119H12.5	-1.58719	0.00289295	0.107806
GPR65	-1.87089	0.00291795	0.108669
YPEL1	-1.22892	0.00292215	0.108756
KLRF1	-1.90876	0.00292731	0.108791
RP11-385M4.2	-1.66013	0.00292796	0.108791
TAAR4P	-1.14998	0.00292885	0.108791
AC009970.1	-3.17348	0.00293052	0.108791
CYP3A4	3.92444	0.00294416	0.109228
RP11-249L21.2	-1.65973	0.00295987	0.109742
CTD-2542C24.2	-2.1378	0.0029634	0.109803
HELT	-1.67921	0.00296666	0.109812
LINC00639	-1.95954	0.0029674	0.109812
SDCBP2P1	-1.35995	0.00297127	0.109886
PRSS3	3.64428	0.00297701	0.110029
TFEC	-2.2492	0.00298098	0.110106
SOX21	5.19946	0.00298594	0.11022
ARHGAP25	-1.67713	0.00298806	0.110229
ME2P1	-1.47901	0.00299942	0.110578
FBXO36P1	-2.65374	0.00300968	0.110887
PLEKHO1	-1.38585	0.00303965	0.111921
CTB-57H20.1	-1.14884	0.00304989	0.112157
OR2G6	-1.14884	0.00304989	0.112157
AL162151.4	-1.24198	0.00306471	0.112567
PTCHD3P2	4.40092	0.00306532	0.112567
KRTAP17-1	-1.26162	0.00306765	0.112567
CIITA	-1.90218	0.00306873	0.112567
ATE1-AS1	3.28754	0.00308356	0.11304
RP11-1147P1.1	-1.54295	0.00309696	0.113434
MSL3	-0.832516	0.00309988	0.113434
CTD-2507G9.1	-1.45304	0.00310011	0.113434
AC005740.5	-2.94	0.00310312	0.113473
RP11-470M17.2	-4.56022	0.00311593	0.113862
SNORA38B	-3.75157	0.00311764	0.113862
RP11-678D18.1	-1.40925	0.00312566	0.114052
RP5-1042I8.7	-1.32665	0.00312674	0.114052
KRTAP2-2	-3.55196	0.00313574	0.114309
IFFO1	-1.19463	0.00315017	0.114759
AC011516.2	-4.19256	0.00315309	0.114759
DOCK2	-1.98457	0.00315395	0.114759
RP11-267J23.1	-4.60156	0.00315868	0.114859
RP11-44N12.2	-1.49113	0.00317213	0.115207
RP11-876N24.4	-1.58951	0.00317216	0.115207
RP5-1171I10.5	-2.58359	0.00319312	0.115883
AP000235.2	-0.813834	0.00319669	0.115883
NPM1P19	-3.38028	0.0031988	0.115883
SNORA17	-0.993123	0.00320021	0.115883
MUC1	2.99513	0.00320259	0.115883
WDFY4	-2.24611	0.00320314	0.115883
BIN2	-1.79065	0.00320464	0.115883
CYLC2	-1.00721	0.00321776	0.116286
RP4-728D4.3	-2.0754	0.00322206	0.116369
RP11-449D8.2	-1.3593	0.00323535	0.116778
KRT8P20	-1.83149	0.00324629	0.116931
FGD2	-1.80069	0.00324684	0.116931
PIK3R5	-1.95147	0.00324718	0.116931
RP11-759F5.1	-3.27042	0.0032478	0.116931
CAPN5	1.99503	0.00324959	0.116931
RN7SL384P	-1.75269	0.00325598	0.117089
EXPH5	1.34569	0.00327865	0.117775
KISS1	3.8441	0.00327907	0.117775
MTND4P11	-2.06442	0.00328461	0.117902
CLUHP10	-1.13501	0.00329292	0.118009
AF238380.8	-1.22732	0.00329354	0.118009
RP11-457M11.6	-1.47346	0.00329469	0.118009
RN7SL801P	-1.73548	0.00329832	0.118009
RP11-169E6.3	-1.55634	0.00329837	0.118009
SLA	-2.05112	0.00329967	0.118009
NOL8P1	-1.48893	0.00330406	0.118089
ALAS2	-4.01862	0.00330725	0.118089
MTND5P31	-0.801659	0.003314	0.118089
RP11-23F23.3	-0.801659	0.003314	0.118089
RP11-897M7.2	-0.801659	0.003314	0.118089
RP11-139I14.2	-0.801659	0.003314	0.118089
CSF1R	-1.75272	0.00332801	0.118516
UGT1A1	4.79769	0.00333914	0.11884
AREG	2.65183	0.00334241	0.118884
AC000367.1	-1.68026	0.00334751	0.118993
RP5-999L4.2	4.66145	0.00335266	0.119104
RP4-734P14.4	3.95281	0.0033561	0.119154
OR11A1	-1.61505	0.00335939	0.119198
CNDP2	-0.775354	0.00336742	0.119411
AK4P2	-1.29887	0.0033766	0.119664
GPHB5	-1.55618	0.0033855	0.119907
HNRNPA1P69	-1.14959	0.00341162	0.120759
RP11-407N17.2	-1.79081	0.00342021	0.12099
SPINK1	4.20841	0.00343225	0.121343
P2RY13	-2.29705	0.00343829	0.121483
RP11-150C16.1	4.39958	0.00344089	0.121501
SLPI	2.62186	0.00344427	0.121547
AC013399.3	-1.52406	0.00346445	0.122169
HRASLS2	4.11631	0.00346606	0.122169
PIN1P1	-1.147	0.00347425	0.122384
RP11-400G3.5	4.96754	0.0034915	0.122918
SPATA17	1.62874	0.00349753	0.123056
AQP5	4.64758	0.00350014	0.123074
RP11-626G11.1	3.0414	0.00352513	0.123879
OR1M1	-1.01731	0.00352988	0.123971
2022-03-01	-1.79048	0.00353831	0.124193
KRT72	-4.35594	0.00354349	0.1243
RHOQ	-0.925634	0.00355575	0.124655
RP11-62H7.3	-1.78215	0.00356085	0.124691
ECEL1P2	4.90522	0.00356101	0.124691
LAT2	-1.5501	0.00356956	0.124915
C1QA	-1.74996	0.00358831	0.125496
GPX2	2.95315	0.00360192	0.125898
GYPC	-1.40448	0.00360468	0.125919
EEF1A1P9	-0.952781	0.00361013	0.126034
PRR23A	-1.22637	0.00361386	0.126089
ONECUT3	5.813	0.00361985	0.126223
RNU6ATAC40P	-2.82794	0.00363545	0.126636
RP11-438N5.4	-1.84902	0.00363602	0.126636
PSTPIP1	-1.6872	0.00364002	0.126649
RNA5SP494	-3.00767	0.00364072	0.126649
EXOC3L1	-1.08931	0.00364375	0.126679
C17orf105	-3.06102	0.00365524	0.127003
RP5-1168A5.1	-2.07777	0.00366343	0.127151
NRROS	-1.58687	0.00366383	0.127151
RP11-90P5.5	-3.31805	0.00368063	0.127658
RP11-692C24.1	-1.45022	0.0036926	0.127998
RPL27P12	-1.5548	0.00371073	0.12855
RP11-486A14.1	3.77196	0.00371465	0.128553
NEBL	1.41647	0.00371519	0.128553
BCL2	-1.66215	0.00372952	0.128972
AC005550.3	5.02424	0.00373746	0.129171
ICA1	0.958059	0.00373979	0.129175
SNX20	-1.99148	0.00374547	0.129295
SBK1	-1.71726	0.00375103	0.12941
RP11-244B22.3	-1.24084	0.0037553	0.129417
RP11-51F16.1	-1.58133	0.00375893	0.129417
CRB3	1.59671	0.00375957	0.129417
SLC20A1P1	-1.14684	0.00376216	0.129417
RGS19	-1.11125	0.00376226	0.129417
SNORA84	-3.33613	0.00376732	0.129515
CYP2C18	3.76866	0.0037725	0.129617
RP11-568J23.1	-1.64466	0.00378265	0.12989
GEMIN2P1	-1.22556	0.0037893	0.130041
ZG16B	3.03787	0.00379654	0.130214
PIK3AP1	-1.72754	0.00380366	0.130382
ACSM5	-2.23956	0.00382235	0.130946
LCP2	-1.65754	0.00382746	0.131044
RP6-186E3.1	-1.66146	0.00383927	0.131356
GDF7	-2.34489	0.00384107	0.131356
KRT8P34	-2.50799	0.00384642	0.131463
TRIM40	4.40923	0.00385254	0.131524
CYBB	-2.07723	0.0038544	0.131524
PLD4	-2.0313	0.00385495	0.131524
DTX1	-1.46465	0.00387301	0.131999
AC006355.3	-1.13325	0.00387337	0.131999
FARSA-AS1	-2.31764	0.00388139	0.132162
RP11-809H16.2	-1.90418	0.00388417	0.132162
DOK2	-1.61265	0.00388492	0.132162
GAPT	-2.4936	0.0039208	0.133305
RP11-429J17.7	2.10204	0.00393289	0.133638
XKR9	2.36428	0.00394861	0.134081
RP11-354I10.1	-1.31231	0.0039514	0.134081
RP11-23E19.1	-2.81686	0.00395344	0.134081
RP11-678G14.5	-1.65465	0.00395772	0.134081
SHANK3	-1.23772	0.0039589	0.134081
IL10RA	-1.70672	0.00396044	0.134081
MED6P1	-1.22468	0.00396193	0.134081
TBX15	3.01664	0.00397494	0.134443
HK3	-2.17546	0.00398271	0.134566
NKX2-5	-3.98687	0.00398389	0.134566
PLA2G4C	-1.28568	0.00398567	0.134566
GS1-531I17.3	-2.97776	0.00398776	0.134566
GMFG	-1.4894	0.0039972	0.134807
RP11-848G14.5	-1.83071	0.00400308	0.134928
FAM188B	0.816717	0.00400673	0.134973
TNFAIP3	-1.54	0.00401993	0.13533
LSP1	-1.6962	0.00402194	0.13533
RP11-861A13.3	-1.96392	0.00402746	0.135438
CARD8	-0.834262	0.00403049	0.135462
RASAL3	-1.78317	0.00403411	0.135506
C19orf33	3.23602	0.00406003	0.136298
TUBB4A	-2.68538	0.00406486	0.136382
HMGB3P16	-1.76431	0.00409063	0.137168
HNRNPA1P47	-2.05559	0.00409664	0.137281
GAPDHP55	-2.1639	0.00409869	0.137281
CD4	-1.64047	0.00410857	0.137534
RP11-78O7.1	-1.74638	0.0041233	0.137948
RP11-800A18.4	5.22902	0.0041385	0.138377
RP11-626A5.2	-1.40512	0.00415389	0.138737
RP11-350J20.12	4.68118	0.00415459	0.138737
PRF1	-1.61383	0.00415636	0.138737
ARHGAP30	-1.68233	0.00418941	0.139761
TNS4	4.41951	0.00420635	0.140246
SUB1P4	-1.65322	0.00421113	0.140326
PPM1M	-0.850432	0.00422432	0.14062
CLDN12	1.12216	0.00422477	0.14062
MRPL42P2	-2.84248	0.00422848	0.140664
AC011999.1	-2.64592	0.0042423	0.141043
COBL	1.50468	0.00424762	0.14114
NKG7	-1.81803	0.00425142	0.141186
CTC-436P18.3	4.50307	0.00425918	0.141364
SP5	2.12938	0.00426534	0.141488
RP11-147L13.15	-1.35113	0.0042708	0.141589
STYK1	2.55355	0.00428014	0.141818
KRT8	1.55258	0.00428293	0.14183
C6orf223	3.1181	0.00428553	0.141837
RP11-638L3.4	-1.20273	0.00429785	0.142164
FABP1	6.92839	0.00431255	0.14257
CTD-2199O4.3	-2.28265	0.00432168	0.142791
KLK11	4.51151	0.0043466	0.143533
CYB561A3	-0.7345	0.0043626	0.14398
USP12-AS1	-1.82042	0.00436905	0.144112
KLF1	-3.27361	0.00437414	0.144199
ANKDD1A	-1.14996	0.00438111	0.144348
SLC22A18AS	2.13698	0.00439295	0.144656
SIGLEC10	-1.97807	0.00440161	0.14486
PDCD5P2	-1.62975	0.00441343	0.145168
CLECL1	-2.95833	0.00441683	0.145198
CNBD1	-2.5579	0.00443951	0.145767
TLR7	-2.27169	0.00444086	0.145767
GPCPD1	-0.932403	0.00444254	0.145767
RP5-1185I7.1	4.75416	0.00444409	0.145767
BNIP3P36	-1.28198	0.00445892	0.146166
RP11-478C6.5	-4.52087	0.00446125	0.146166
F2	4.21216	0.00448647	0.14691
WNT7B	2.60139	0.00451341	0.147675
RPS26P4	-1.55068	0.00451489	0.147675
L3HYPDH	-0.969666	0.00453199	0.148135
SNORA38	-1.62853	0.00453398	0.148135
RP11-1157N2__B.2	-3.57475	0.00454319	0.148352
RP11-77K12.7	3.93959	0.00456449	0.148965
FAM3D	3.74362	0.00458358	0.149479
ATP1B1	1.38254	0.00458534	0.149479
SPN	-1.9042	0.00458789	0.149479
TRGC1	-2.2447	0.00459937	0.14977
OR6K3	-2.6248	0.00460596	0.149901
OR4F17	-1.21226	0.00462331	0.150382
NANOGP9	-1.22243	0.00463556	0.150697
KCNAB2	-1.33379	0.00465568	0.151253
PDE1B	-1.46376	0.00465783	0.151253
PLEKHA5	1.02782	0.00467386	0.151677
TYROBP	-1.5854	0.00467606	0.151677
C11orf70	1.465	0.00469928	0.152345
RP11-408E5.5	-1.62903	0.00470385	0.152409
PTGER4P3	-2.20515	0.00470876	0.152484
SDC1	1.89702	0.00472153	0.152813
PCAT1	2.46806	0.00472882	0.152965
SETP16	-1.2806	0.0047432	0.153345
ADPRH	-1.04775	0.00475123	0.15352
RPL38P4	-2.03245	0.00475677	0.153614
RP11-734K21.2	5.20258	0.00476362	0.153751
C17orf62	-0.653102	0.00477178	0.153929
RNU1-85P	-2.41093	0.00479182	0.154491
RAPGEFL1	2.15943	0.0048072	0.154868
AC007386.3	-4.40724	0.00480881	0.154868
C20orf173	-1.53705	0.00481281	0.154912
RPS3AP3	-1.84296	0.00482847	0.15533
LL22NC03-104C7.1	-3.49755	0.0048348	0.155408
GS1-590J6.2	-1.18848	0.00483846	0.155408
RP4-604A21.1	-1.76079	0.00483884	0.155408
AC008592.7	-1.35253	0.00484378	0.155444
SLC15A3	-1.39535	0.00484527	0.155444
C7orf77	-2.90787	0.0048486	0.155466
RPS16P9	-1.51829	0.00485638	0.15563
AP000281.1	-4.08807	0.0048594	0.155642
BTC	1.40375	0.0048652	0.155742
TPRX2P	-1.22201	0.00488101	0.156148
TMED3	0.721444	0.0048832	0.156148
MAP4K1	-1.92478	0.00489512	0.156444
EVPL	2.92116	0.00491185	0.156893
TMEM54	1.24791	0.00491741	0.156916
RP11-46C24.3	-2.16415	0.00491939	0.156916
KRTAP10-6	-1.002	0.00492061	0.156916
RPL21P71	-1.48362	0.00492534	0.156972
AC012066.1	-4.17344	0.00492951	0.156972
RP11-60C6.8	-2.50542	0.00493041	0.156972
ENTPD2	1.79897	0.00493944	0.157097
CD37	-2.16748	0.00494338	0.157097
RP1-34L19.1	-2.85843	0.00494455	0.157097
GPR79	-3.51371	0.00494508	0.157097
UBXN10	1.7005	0.00495676	0.157244
MAP3K8	-1.36857	0.0049569	0.157244
RP11-506H20.1	3.05247	0.00495775	0.157244
SCN11A	-2.04984	0.00499359	0.158295
RP11-556N4.1	-1.09805	0.0049996	0.1584
ABCF2P1	-1.94348	0.00501152	0.158612
SCGB2A1	3.60281	0.0050117	0.158612
ARHGDIB	-1.28108	0.0050192	0.158642
FCER1G	-1.66669	0.00502012	0.158642
MGAT1	-0.59898	0.00502217	0.158642
GRAMD4P1	-1.12961	0.00502348	0.158642
SEMA4G	1.71119	0.00503794	0.159013
PYGB	1.289	0.00505162	0.159277
NR2F6	1.04215	0.00505176	0.159277
BACH2	-1.76024	0.00505919	0.159426
ARL11	-1.77073	0.00508664	0.160136
TBC1D10C	-2.10178	0.00508719	0.160136
RP11-384L8.1	1.50513	0.00509633	0.160337
RP11-834C11.5	4.85056	0.00511795	0.160915
RP11-64B16.4	-3.26761	0.00512017	0.160915
GPRC5D	2.0696	0.00513122	0.161175
APOBEC1	4.89057	0.0051381	0.161305
RP11-1079K10.5	-0.99102	0.00514544	0.161362
RP11-555H23.1	-0.99102	0.00514544	0.161362
RN7SL225P	-3.25004	0.00516429	0.161867
NCF1	-2.02132	0.0051674	0.161878
KDELR3	1.43039	0.00518625	0.16232
LIPH	2.62479	0.00518706	0.16232
PRR15	2.1643	0.00519453	0.162467
RP11-60H5.1	-1.77367	0.00519758	0.162476
HSPA8P16	-1.28423	0.00520423	0.162597
AC004257.1	-1.72643	0.00521532	0.162856
BCO1	2.11685	0.00522144	0.162961
C2CD2	-0.795964	0.00524618	0.163646
CDC42BPA	0.955091	0.0052593	0.163758
OR6N1	-1.12873	0.00526197	0.163758
HNRNPA1P56	-1.12873	0.00526197	0.163758
RP11-26N15.2	-1.12873	0.00526197	0.163758
CD300LB	-1.87635	0.00526374	0.163758
ZNRF1	0.812025	0.00527687	0.164079
C1orf162	-1.68167	0.00528575	0.164268
RP11-848P1.2	-1.12564	0.00529278	0.164377
ACOT11	1.21872	0.00529489	0.164377
TBX21	-2.02608	0.00530076	0.164472
TP53INP1	-1.09031	0.00531614	0.164846
RP11-400F19.8	-3.44556	0.00532024	0.164846
GCAT	1.18525	0.00532123	0.164846
ELFN2	2.68794	0.00532573	0.164898
STX11	-1.61915	0.00532869	0.164902
LL22NC03-30E12.11	-1.87539	0.00534132	0.165206
RIN1	1.24622	0.00537141	0.166049
RGL4	-2.04716	0.00537823	0.166172
SUMO1P1	-4.58529	0.00538875	0.166384
POU2F2	-1.7053	0.00539666	0.166384
RHBDL1	1.89059	0.0053968	0.166384
PSTPIP2	-1.60542	0.00539687	0.166384
S1PR5	-1.66526	0.00539928	0.166384
RP11-1151B14.3	-2.08872	0.00541863	0.166892
AC144838.3	-1.29166	0.00542581	0.16697
AC139143.2	-1.37483	0.00543077	0.16697
HAAO	-1.10233	0.00543116	0.16697
ADGRE2	-1.61398	0.00543255	0.16697
CNN2P8	-2.49818	0.00543759	0.167037
CORO1A	-1.77071	0.00544722	0.167245
TMC8	-1.82794	0.00546259	0.167628
RP11-284F21.8	-1.6193	0.00546714	0.167628
KRT75	-4.24848	0.00547929	0.167628
SOX5P	-1.11775	0.00549058	0.167628
PREX1	-1.3086	0.00549268	0.167628
NCF2	-1.84117	0.00549935	0.167628
FA2H	2.20296	0.0055032	0.167628
CTB-55O6.12	-0.909427	0.00550569	0.167628
RP11-141P6.1	-1.12866	0.00550576	0.167628
RP11-212D3.4	-0.999923	0.00550741	0.167628
KRT18P42	-0.999923	0.00550741	0.167628
RP11-685B24.1	-0.787545	0.00550771	0.167628
RP11-781E19.1	-0.787545	0.00550771	0.167628
SALL4P2	-0.787545	0.00550771	0.167628
CTA-212A2.3	-0.787545	0.00550771	0.167628
RP11-319E16.2	-0.787545	0.00550771	0.167628
SHROOM1	1.19734	0.00551017	0.167628
RP11-680F20.5	-2.69937	0.00551121	0.167628
DAP	0.519562	0.00555327	0.16882
IGSF6	-1.8086	0.00557916	0.169446
BTN2A2	-1.15633	0.00558073	0.169446
RP11-26L20.3	-1.45187	0.00558254	0.169446
FTLP3	-1.37719	0.00559205	0.169647
VENTX	-1.60938	0.00559587	0.169675
ELOVL6	1.40406	0.00560938	0.169985
RP11-35G9.3	-1.05488	0.00561191	0.169985
KDM2B	-0.738722	0.00561827	0.17009
RP11-130L8.1	-2.25399	0.00562207	0.170117
VSIG2	3.36124	0.00562907	0.170176
VWA3B	2.00653	0.00563519	0.170176
ITSN2	-0.624543	0.0056352	0.170176
2022-03-04	2.83907	0.00563565	0.170176
KNOP1P4	-1.19632	0.00564563	0.17039
HIST1H2BC	1.91887	0.00568264	0.171419
CTD-2410N18.1	-1.516	0.00568672	0.171453
RP11-219O3.2	-2.52477	0.00569163	0.171513
CGB8	6.50467	0.00570397	0.171762
TMEM140	-0.801124	0.00570575	0.171762
JARID2	-0.790133	0.00571135	0.171842
TSEN15P2	-4.01937	0.00572183	0.17201
RP11-886P16.6	-2.64304	0.00572537	0.17201
LINC00589	3.20477	0.00572573	0.17201
CYB561	0.858186	0.00574089	0.172377
SPINK4	6.36109	0.00574522	0.172418
MCOLN2	-2.17696	0.00574881	0.172438
RP11-368J21.3	-1.784	0.0057782	0.173127
CECR1	-1.79571	0.00578077	0.173127
SLC47A1	-1.84092	0.00578092	0.173127
RPL7P4	-2.33307	0.00578359	0.173127
TDGF1P2	-1.40037	0.00578794	0.173147
RP11-318E3.4	5.34083	0.00579018	0.173147
RP11-362F19.3	4.17298	0.0058067	0.173502
ENTPD8	2.48214	0.00580798	0.173502
HCG16	4.81284	0.00581409	0.173596
KRT18P50	-1.01192	0.00581923	0.173602
CLDN7	1.51149	0.00582021	0.173602
LINC00687	-1.44248	0.00583355	0.173911
FOSL1	2.30421	0.00583771	0.173947
HBBP1	-1.49886	0.00584083	0.173951
FAM26F	-1.8009	0.00584634	0.173972
RP11-22N19.2	2.12835	0.00584747	0.173972
IRF5	-1.09278	0.00585109	0.173991
IL27RA	-1.14044	0.00585432	0.173999
MTND2P26	-2.66105	0.00588078	0.174697
CA9	3.74492	0.00590053	0.175173
SPINT2	1.19589	0.00590278	0.175173
BRD7P5	-2.31173	0.00592283	0.175679
FMNL3	-1.16013	0.00592676	0.175706
HERC2P11	-1.95527	0.00596829	0.176848
RP6-159A1.4	-2.35859	0.00597408	0.17693
FCGR1B	-1.76537	0.0059822	0.17703
CAMK1D	-1.42598	0.00598565	0.17703
MYO1G	-1.69567	0.00598651	0.17703
RP11-649A18.5	4.03359	0.005996	0.177221
LINC01203	-1.76088	0.00603595	0.178312
RN7SL398P	-1.74022	0.00604152	0.178318
GFPT1	0.976321	0.00604224	0.178318
RP1-180M12.1	-2.5215	0.00605568	0.178624
C19orf35	-1.88444	0.00605907	0.178634
TSPAN8	3.0267	0.00607689	0.17907
CTB-138E5.1	-4.49615	0.00608284	0.179155
MNDA	-1.94204	0.0060918	0.179319
TRGC2	-2.2963	0.00609453	0.179319
PDE11A	1.79987	0.00610792	0.179592
RP11-1348G14.7	-1.78519	0.00610994	0.179592
LRRC66	2.48361	0.00611546	0.179664
CTA-833B7.2	-3.67406	0.0061334	0.180101
MOGAT3	4.68836	0.00614017	0.180209
FTH1P11	-1.40655	0.00615456	0.180541
RP11-719K4.3	4.72692	0.00616271	0.180609
RP11-137O10.1	-1.51363	0.00616305	0.180609
[truncated: 56,582 more rows]
