# Supplementary material for: Genomic and clinical features of endoplasmic reticulum stress factor in digestive system pan-cancer studies
Source: Front Oncol. 2023 Jan 9;12:1072576. doi: 10.3389/fonc.2022.1072576 (PMC9868864; doi:10.3389/fonc.2022.1072576)
Supplement: Supplementary file 11 [file Table_11.xls]

## Sheet: TableS11 correlation between ge
gene	cor	FDR	drug_names	PATHWAY_NAME	PUTATIVE_TARGET
EEF2	-0.392368	2.11562e-06	Nilotinib	ABL signaling	ABL
LMNA	0.327842	9.19994e-05	Nilotinib	ABL signaling	ABL
MTHFD2	-0.336014	5.96327e-05	Nilotinib	ABL signaling	ABL
SSR1	-0.32913	8.59914e-05	Nilotinib	ABL signaling	ABL
WFS1	0.319385	0.000142272	Nilotinib	ABL signaling	ABL
EXOC2	-0.37151	9.1538e-06	LCL161	Apoptosis regulation	XIAP, IAP1, IAP2
LMNA	0.312979	0.000219045	AZD5991	Apoptosis regulation	MCL1
NABP1	0.333587	7.69349e-05	AZD5991	Apoptosis regulation	MCL1
SSR1	-0.300371	0.000400677	AZD5991	Apoptosis regulation	MCL1
WFS1	0.304882	0.000323813	AZD5991	Apoptosis regulation	MCL1
EEF2	-0.366764	1.21294e-05	Sabutoclax	Apoptosis regulation	BCL2, BCL-XL, BFL1, MCL1
EXOSC9	-0.333728	7.63645e-05	Sabutoclax	Apoptosis regulation	BCL2, BCL-XL, BFL1, MCL1
PSAT1	-0.327022	0.00010825	Sabutoclax	Apoptosis regulation	BCL2, BCL-XL, BFL1, MCL1
SSR1	-0.310492	0.00024729	Sabutoclax	Apoptosis regulation	BCL2, BCL-XL, BFL1, MCL1
ASNS	-0.305743	0.00027988	Venetoclax	Apoptosis regulation	BCL2
LMNA	0.308455	0.000245293	Venetoclax	Apoptosis regulation	BCL2
ALDH18A1	0.344335	3.78657e-05	Sepantronium bromide	Apoptosis regulation	BIRC5
EXOC2	-0.381233	4.3042e-06	Sepantronium bromide	Apoptosis regulation	BIRC5
EXTL2	-0.300003	0.000368503	MIM1	Apoptosis regulation	MCL1
EXOSC9	-0.309006	0.000182791	AZD7762	Cell cycle	CHEK1, CHEK2
MTHFD2	-0.319338	0.000107223	AZD7762	Cell cycle	CHEK1, CHEK2
ASNS	-0.318634	0.0001478	Wee1 Inhibitor	Cell cycle	WEE1, CHEK1
CEBPG	-0.324463	0.000109674	Wee1 Inhibitor	Cell cycle	WEE1, CHEK1
EEF2	-0.315586	0.000172336	Wee1 Inhibitor	Cell cycle	WEE1, CHEK1
EXOSC9	-0.30291	0.000320801	Wee1 Inhibitor	Cell cycle	WEE1, CHEK1
GEMIN4	-0.314923	0.00017815	Wee1 Inhibitor	Cell cycle	WEE1, CHEK1
IGFBP1	0.303932	0.000305438	Wee1 Inhibitor	Cell cycle	WEE1, CHEK1
MTHFD2	-0.40475	9.31133e-07	Wee1 Inhibitor	Cell cycle	WEE1, CHEK1
NABP1	0.375819	6.02308e-06	Wee1 Inhibitor	Cell cycle	WEE1, CHEK1
WFS1	0.311563	0.000210541	Wee1 Inhibitor	Cell cycle	WEE1, CHEK1
ALDH18A1	-0.352068	1.61749e-05	Palbociclib	Cell cycle	CDK4, CDK6
ASNS	-0.350914	1.73163e-05	Palbociclib	Cell cycle	CDK4, CDK6
CXXC1	-0.422301	1.492e-07	Palbociclib	Cell cycle	CDK4, CDK6
DKC1	-0.305948	0.000202394	Palbociclib	Cell cycle	CDK4, CDK6
EEF2	-0.404609	5.38751e-07	Palbociclib	Cell cycle	CDK4, CDK6
EXOSC5	-0.450002	1.71409e-08	Palbociclib	Cell cycle	CDK4, CDK6
EXOSC8	-0.386946	1.80693e-06	Palbociclib	Cell cycle	CDK4, CDK6
GEMIN4	-0.305928	0.000202603	Palbociclib	Cell cycle	CDK4, CDK6
IFIT1	0.364597	7.5784e-06	Palbociclib	Cell cycle	CDK4, CDK6
MTHFD2	-0.310331	0.000161936	Palbociclib	Cell cycle	CDK4, CDK6
NABP1	0.394617	1.07758e-06	Palbociclib	Cell cycle	CDK4, CDK6
NOP14	-0.40914	3.90504e-07	Palbociclib	Cell cycle	CDK4, CDK6
PSAT1	-0.312116	0.000147727	Palbociclib	Cell cycle	CDK4, CDK6
SDAD1	-0.401203	6.84091e-07	Palbociclib	Cell cycle	CDK4, CDK6
SSR1	-0.33674	3.91852e-05	Palbociclib	Cell cycle	CDK4, CDK6
ASNS	-0.314854	0.000128179	MK-1775	Cell cycle	WEE1, PLK1
CEBPG	-0.306753	0.000194328	MK-1775	Cell cycle	WEE1, PLK1
IGFBP1	0.32877	6.09666e-05	MK-1775	Cell cycle	WEE1, PLK1
MTHFD2	-0.348407	2.00654e-05	MK-1775	Cell cycle	WEE1, PLK1
NABP1	0.345239	2.41282e-05	MK-1775	Cell cycle	WEE1, PLK1
NOLC1	-0.321145	9.20157e-05	MK-1775	Cell cycle	WEE1, PLK1
PSAT1	-0.306675	0.000195097	MK-1775	Cell cycle	WEE1, PLK1
SSR1	-0.331563	8.55475e-05	Dinaciclib	Cell cycle	CDK1, CDK2, CDK5, CDK9
SSR1	-0.399717	1.56407e-06	AZD5438	Cell cycle	CDK2
NABP1	0.339572	5.59739e-05	CDK9_5576	Cell cycle	CDK9
SSR1	-0.456448	2.63619e-08	CDK9_5576	Cell cycle	CDK9
EXOC2	-0.370296	9.84163e-06	CDK9_5038	Cell cycle	CDK9
SSR1	-0.338699	5.86562e-05	CDK9_5038	Cell cycle	CDK9
NABP1	0.304751	0.000361627	MK-8776	Cell cycle	CHEK1, CHEK2, CDK2
SSR1	-0.311046	0.000268312	MK-8776	Cell cycle	CHEK1, CHEK2, CDK2
ALDH18A1	-0.368711	9.27863e-06	Vorinostat	Chromatin histone acetylation	HDAC inhibitor Class I, IIa, IIb, IV
EXOSC5	-0.308427	0.000245629	Vorinostat	Chromatin histone acetylation	HDAC inhibitor Class I, IIa, IIb, IV
MTHFD2	-0.312674	0.000199273	Vorinostat	Chromatin histone acetylation	HDAC inhibitor Class I, IIa, IIb, IV
EEF2	-0.311218	0.000238707	PCI-34051	Chromatin histone acetylation	HDAC8, HDAC6, HDAC1
SSR1	-0.343098	4.62655e-05	PCI-34051	Chromatin histone acetylation	HDAC8, HDAC6, HDAC1
CEBPG	-0.322237	0.000138172	OF-1	Chromatin histone acetylation	BRPF1B, BRPF2
NABP1	0.351171	2.96564e-05	OF-1	Chromatin histone acetylation	BRPF1B, BRPF2
EEF2	-0.313388	0.000123954	EPZ004777	Chromatin histone methylation	DOT1L
LMNA	0.358479	9.53968e-06	EPZ004777	Chromatin histone methylation	DOT1L
MTHFD2	-0.311585	0.000136227	EPZ004777	Chromatin histone methylation	DOT1L
NABP1	0.34049	2.78387e-05	EPZ004777	Chromatin histone methylation	DOT1L
NOLC1	-0.305188	0.000189516	EPZ004777	Chromatin histone methylation	DOT1L
SSR1	-0.341269	2.66123e-05	EPZ004777	Chromatin histone methylation	DOT1L
WFS1	0.40744	3.65272e-07	EPZ004777	Chromatin histone methylation	DOT1L
CXXC1	-0.310526	0.000143954	EPZ5676	Chromatin histone methylation	DOT1L
EEF2	-0.336541	3.49115e-05	EPZ5676	Chromatin histone methylation	DOT1L
IFIT1	0.301094	0.000233188	EPZ5676	Chromatin histone methylation	DOT1L
NOLC1	-0.301909	0.000223813	EPZ5676	Chromatin histone methylation	DOT1L
WFS1	0.349339	1.65731e-05	EPZ5676	Chromatin histone methylation	DOT1L
WFS1	0.302126	0.000388348	GSK591	Chromatin histone methylation	PMRT5
EXOSC2	-0.325383	0.000117742	PFI3	Chromatin other	Polybromo 1, SMARCA4, SMARCA2
EEF2	-0.353726	2.56957e-05	I-BET-762	Chromatin other	BRD2, BRD3, BRD4
EEF2	-0.321022	0.000146907	RVX-208	Chromatin other	BRD4
EXTL2	-0.300385	0.000400402	RVX-208	Chromatin other	BRD4
EEF2	-0.313072	0.000218053	OTX015	Chromatin other	BRD2, BRD3, BRD4
CXXC1	-0.304643	0.000327515	AZD5153	Chromatin other	BRD4
DKC1	-0.318806	0.000146513	I-BRD9	Chromatin other	BRD9
EEF2	-0.324276	0.000110737	I-BRD9	Chromatin other	BRD9
EXOSC5	-0.325527	0.000103792	I-BRD9	Chromatin other	BRD9
GEMIN4	-0.316025	0.000168584	I-BRD9	Chromatin other	BRD9
IGFBP1	0.307055	0.000262624	I-BRD9	Chromatin other	BRD9
SRPRB	-0.305398	0.000284596	I-BRD9	Chromatin other	BRD9
SSR1	-0.3182	0.000151084	I-BRD9	Chromatin other	BRD9
EXTL2	-0.350259	3.12037e-05	PAK_5339	Cytoskeleton	PAK1, PAK2
NOP14	-0.300745	0.000355742	BDP-00009066	Cytoskeleton	MRCKB_HUMAN
SSR1	-0.369075	9.07778e-06	BDP-00009066	Cytoskeleton	MRCKB_HUMAN
EEF2	-0.317031	9.66552e-05	Camptothecin	DNA replication	TOP1
EEF2	-0.338961	4.47066e-05	Cisplatin	DNA replication	DNA crosslinker
NABP1	0.31887	0.000130326	Cisplatin	DNA replication	DNA crosslinker
SSR1	-0.322106	0.000110249	Cisplatin	DNA replication	DNA crosslinker
EEF2	-0.319225	9.09255e-05	Irinotecan	DNA replication	TOP1
SDAD1	-0.310829	0.000141702	Irinotecan	DNA replication	TOP1
ALDH18A1	-0.386209	1.47486e-06	Oxaliplatin	DNA replication	DNA alkylating agent
ASNS	-0.385792	1.51704e-06	Oxaliplatin	DNA replication	DNA alkylating agent
CEBPG	-0.398807	6.17014e-07	Oxaliplatin	DNA replication	DNA alkylating agent
DCP1A	-0.355098	1.0926e-05	Oxaliplatin	DNA replication	DNA alkylating agent
DKC1	-0.315122	0.000107025	Oxaliplatin	DNA replication	DNA alkylating agent
EEF2	-0.395035	8.03959e-07	Oxaliplatin	DNA replication	DNA alkylating agent
EXOSC5	-0.329625	4.84916e-05	Oxaliplatin	DNA replication	DNA alkylating agent
EXOSC8	-0.342404	2.33364e-05	Oxaliplatin	DNA replication	DNA alkylating agent
IFIT1	0.30994	0.000140655	Oxaliplatin	DNA replication	DNA alkylating agent
LMNA	0.303246	0.000198719	Oxaliplatin	DNA replication	DNA alkylating agent
MTHFD2	-0.401506	5.09511e-07	Oxaliplatin	DNA replication	DNA alkylating agent
NABP1	0.357898	9.20139e-06	Oxaliplatin	DNA replication	DNA alkylating agent
NOP14	-0.361148	7.522e-06	Oxaliplatin	DNA replication	DNA alkylating agent
PSAT1	-0.307896	0.000156444	Oxaliplatin	DNA replication	DNA alkylating agent
SDAD1	-0.389031	1.21706e-06	Oxaliplatin	DNA replication	DNA alkylating agent
SSR1	-0.400349	5.53191e-07	Oxaliplatin	DNA replication	DNA alkylating agent
EEF2	-0.344531	3.50451e-05	Gemcitabine	DNA replication	Pyrimidine antimetabolite
NABP1	0.309321	0.000291361	Temozolomide	DNA replication	DNA alkylating agent
SSR1	-0.326338	0.00012634	Temozolomide	DNA replication	DNA alkylating agent
WFS1	0.325843	0.000129539	Temozolomide	DNA replication	DNA alkylating agent
EEF2	-0.304931	0.000291086	Epirubicin	DNA replication	Anthracycline
MTHFD2	-0.305561	0.000282357	Epirubicin	DNA replication	Anthracycline
SSR1	-0.300619	0.00035788	Epirubicin	DNA replication	Anthracycline
LMNA	0.312697	0.000199043	Cyclophosphamide	DNA replication	Alkylating agent
MTHFD2	-0.300484	0.000360189	Cyclophosphamide	DNA replication	Alkylating agent
WFS1	0.375968	5.96799e-06	Cyclophosphamide	DNA replication	Alkylating agent
SSR1	-0.306633	0.000297846	Carmustine	DNA replication
EXOSC9	-0.301814	0.000374417	Teniposide	DNA replication
EXOSC9	-0.303736	0.000341928	Nelarabine	DNA replication
NABP1	0.324427	0.000123631	Nelarabine	DNA replication
EXOC2	-0.336591	7.45304e-05	Pyridostatin	DNA replication	G-quadruplex stabiliser
IGFBP1	0.358841	2.22088e-05	Pyridostatin	DNA replication	G-quadruplex stabiliser
NABP1	0.314167	0.000230824	Pyridostatin	DNA replication	G-quadruplex stabiliser
WFS1	0.301252	0.000425674	Pyridostatin	DNA replication	G-quadruplex stabiliser
ADD1	0.347243	3.22108e-05	Gefitinib	EGFR signaling	EGFR
WFS1	0.32598	0.000101381	Gefitinib	EGFR signaling	EGFR
ADD1	0.313838	0.000114575	Afatinib	EGFR signaling	ERBB2, EGFR
IGFBP1	0.337353	3.12798e-05	Afatinib	EGFR signaling	ERBB2, EGFR
WFS1	0.388784	2.66658e-06	Erlotinib	EGFR signaling	EGFR
ADD1	0.344181	3.81898e-05	Lapatinib	EGFR signaling	EGFR, ERBB2
EXOSC2	-0.328131	9.06166e-05	Lapatinib	EGFR signaling	EGFR, ERBB2
WFS1	0.359489	1.38492e-05	AZD3759	EGFR signaling	EGFR
EXOC2	0.309477	0.00016917	Trametinib	ERK MAPK signaling	MEK1, MEK2
ASNS	-0.321226	0.000108926	Dabrafenib	ERK MAPK signaling	BRAF
EXOSC5	-0.326501	8.24983e-05	Dabrafenib	ERK MAPK signaling	BRAF
EXOC2	0.300697	0.000394588	Selumetinib	ERK MAPK signaling	MEK1, MEK2
EXTL2	-0.308004	0.000278881	KRAS (G12C) Inhibitor-12	ERK MAPK signaling	KRAS (G12C)
ASNS	-0.330682	7.45331e-05	Ulixertinib	ERK MAPK signaling	ERK1, ERK2
DCP1A	-0.40625	7.65931e-07	Ulixertinib	ERK MAPK signaling	ERK1, ERK2
EEF2	-0.311206	0.000202972	Ulixertinib	ERK MAPK signaling	ERK1, ERK2
MTHFD2	-0.314645	0.000170906	Ulixertinib	ERK MAPK signaling	ERK1, ERK2
NOP14	-0.382391	3.68575e-06	Ulixertinib	ERK MAPK signaling	ERK1, ERK2
DCP1A	-0.377169	7.04915e-06	VX-11e	ERK MAPK signaling	ERK2
CXXC1	-0.334889	7.18298e-05	Mirin	Genome integrity	MRE11
EEF2	-0.371964	8.90875e-06	Mirin	Genome integrity	MRE11
IGFBP1	0.312609	0.000223055	Mirin	Genome integrity	MRE11
EEF2	-0.326573	0.000110776	Niraparib	Genome integrity	PARP1, PARP2
IFIT1	0.348762	3.16705e-05	Talazoparib	Genome integrity	PARP1, PARP2
SDAD1	-0.329665	8.88549e-05	Talazoparib	Genome integrity	PARP1, PARP2
EXOSC9	-0.301314	0.000346229	AZD6738	Genome integrity	ATR
MTHFD2	-0.306215	0.00027356	AZD6738	Genome integrity	ATR
NABP1	0.328378	8.94499e-05	AZD6738	Genome integrity	ATR
EEF2	-0.352306	2.42104e-05	Telomerase Inhibitor IX	Genome integrity	Telomerase
LMNA	0.363685	1.25182e-05	Telomerase Inhibitor IX	Genome integrity	Telomerase
MTHFD2	-0.348521	2.99838e-05	Telomerase Inhibitor IX	Genome integrity	Telomerase
IFIT1	0.351119	3.41601e-05	BIBR-1532	Genome integrity	TERT
LMNA	0.351205	3.39975e-05	BIBR-1532	Genome integrity	TERT
WFS1	0.322625	0.000152258	BIBR-1532	Genome integrity	TERT
ALDH18A1	-0.301453	0.000400762	VE821	Genome integrity	ATR
CXXC1	-0.313807	0.000222269	VE821	Genome integrity	ATR
EEF2	-0.331987	8.90062e-05	VE821	Genome integrity	ATR
IGFBP1	0.335488	7.41246e-05	VE821	Genome integrity	ATR
NABP1	0.341388	5.41864e-05	VE821	Genome integrity	ATR
SSR1	-0.337817	6.55502e-05	VE821	Genome integrity	ATR
ASNS	-0.323235	0.000116844	Tamoxifen	Hormone-related	ESR1
DKC1	-0.300222	0.000364688	Tamoxifen	Hormone-related	ESR1
MTHFD2	-0.324495	0.000109489	Tamoxifen	Hormone-related	ESR1
NABP1	0.341904	4.32972e-05	Tamoxifen	Hormone-related	ESR1
PSAT1	-0.335552	6.11326e-05	Tamoxifen	Hormone-related	ESR1
EXOC2	-0.314729	0.000109287	Fulvestrant	Hormone-related	ESR
EXOC2	-0.314729	0.000109287	Fulvestrant	Hormone-related
LMNA	0.342566	2.31163e-05	Fulvestrant	Hormone-related	ESR
LMNA	0.342566	2.31163e-05	Fulvestrant	Hormone-related
MTHFD2	-0.311162	0.000131936	Fulvestrant	Hormone-related	ESR
MTHFD2	-0.311162	0.000131936	Fulvestrant	Hormone-related
EXOSC5	-0.303844	0.000306743	GDC0810	Hormone-related	ESR1, ESR2
GEMIN4	-0.331095	7.75291e-05	GDC0810	Hormone-related	ESR1, ESR2
SRPRB	-0.316393	0.000165491	GDC0810	Hormone-related	ESR1, ESR2
WFS1	0.307045	0.000262743	GDC0810	Hormone-related	ESR1, ESR2
DKC1	-0.326806	9.71139e-05	BMS-536924	IGF1R signaling	IGF1R, IR
EXOSC5	-0.355987	1.11086e-05	Linsitinib	IGF1R signaling	IGF1R
EXOSC5	-0.309267	0.000235734	NVP-ADW742	IGF1R signaling	IGF1R
EXOSC5	-0.342072	0.02304	BMS-754807	IGF1R signaling	IGF1R, IR
IFIT1	0.46723	0.00138603	BMS-754807	IGF1R signaling	IGF1R, IR
PREB	-0.32234	0.0328487	BMS-754807	IGF1R signaling	IGF1R, IR
NABP1	0.304209	0.00033434	AGI-6780	Metabolism	IDH2 R140Q mutant
MTHFD2	-0.314984	0.00017761	AGI-5198	Metabolism	IDH1 (R132H)
NOLC1	-0.302812	0.000322311	AGI-5198	Metabolism	IDH1 (R132H)
ASNS	-0.376288	0.0014397	Daporinad	Metabolism	NAMPT
CEBPG	-0.309609	0.00963197	Daporinad	Metabolism	NAMPT
EEF2	-0.41118	0.000448575	Daporinad	Metabolism	NAMPT
IFIT1	0.404129	0.000573677	Daporinad	Metabolism	NAMPT
MTHFD2	-0.510669	7.35656e-06	Daporinad	Metabolism	NAMPT
NABP1	0.307161	0.010251	Daporinad	Metabolism	NAMPT
NOLC1	-0.322068	0.00696027	Daporinad	Metabolism	NAMPT
PSAT1	-0.317172	0.00792055	Daporinad	Metabolism	NAMPT
ASNS	-0.372473	7.39127e-06	Vinblastine	Mitosis	Microtubule destabiliser
CEBPG	-0.321065	0.000130601	Vinblastine	Mitosis	Microtubule destabiliser
EEF2	-0.328206	9.02629e-05	Vinblastine	Mitosis	Microtubule destabiliser
EXOSC2	-0.333484	6.82869e-05	Vinblastine	Mitosis	Microtubule destabiliser
EXOSC5	-0.310634	0.000220413	Vinblastine	Mitosis	Microtubule destabiliser
EXTL2	-0.3299	8.25769e-05	Vinblastine	Mitosis	Microtubule destabiliser
GEMIN4	-0.356535	1.90031e-05	Vinblastine	Mitosis	Microtubule destabiliser
IFIT1	0.321607	0.000127035	Vinblastine	Mitosis	Microtubule destabiliser
LMNA	0.325424	0.000104347	Vinblastine	Mitosis	Microtubule destabiliser
MTHFD2	-0.41786	3.76409e-07	Vinblastine	Mitosis	Microtubule destabiliser
PSAT1	-0.384215	3.56769e-06	Vinblastine	Mitosis	Microtubule destabiliser
WFS1	0.320795	0.000132419	Vinblastine	Mitosis	Microtubule destabiliser
ASNS	-0.378177	2.52338e-06	Docetaxel	Mitosis	Microtubule stabiliser
IGFBP1	0.391538	1.02463e-06	Docetaxel	Mitosis	Microtubule stabiliser
MTHFD2	-0.410467	2.6657e-07	Docetaxel	Mitosis	Microtubule stabiliser
WFS1	0.313568	0.000116224	Docetaxel	Mitosis	Microtubule stabiliser
GEMIN4	-0.339113	5.73678e-05	Alisertib	Mitosis	AURKA
ASNS	-0.429616	1.61603e-07	Paclitaxel	Mitosis	Microtubule stabiliser
CEBPG	-0.317752	0.000154545	Paclitaxel	Mitosis	Microtubule stabiliser
EXOSC5	-0.30719	0.0002609	Paclitaxel	Mitosis	Microtubule stabiliser
GEMIN4	-0.351088	2.59432e-05	Paclitaxel	Mitosis	Microtubule stabiliser
IGFBP1	0.324846	0.000107524	Paclitaxel	Mitosis	Microtubule stabiliser
MTHFD2	-0.386413	3.10311e-06	Paclitaxel	Mitosis	Microtubule stabiliser
NABP1	0.335323	6.18879e-05	Paclitaxel	Mitosis	Microtubule stabiliser
PSAT1	-0.344979	3.65381e-05	Paclitaxel	Mitosis	Microtubule stabiliser
EXOSC9	-0.300784	0.000413446	Vincristine	Mitosis
GEMIN4	-0.300495	0.00041905	Vincristine	Mitosis
IGFBP1	0.338615	6.28325e-05	Vincristine	Mitosis
NABP1	0.311742	0.000245725	Vincristine	Mitosis
ASNS	-0.312713	0.000178263	Vinorelbine	Mitosis	Microtubule destabiliser
CXXC1	-0.331744	6.62222e-05	Vinorelbine	Mitosis	Microtubule destabiliser
EXOSC5	-0.300567	0.000324223	Vinorelbine	Mitosis	Microtubule destabiliser
GEMIN4	-0.305045	0.000260842	Vinorelbine	Mitosis	Microtubule destabiliser
IGFBP1	0.358707	1.45033e-05	Vinorelbine	Mitosis	Microtubule destabiliser
MTHFD2	-0.336722	5.05542e-05	Vinorelbine	Mitosis	Microtubule destabiliser
PSAT1	-0.300733	0.000321649	Vinorelbine	Mitosis	Microtubule destabiliser
ASNS	-0.364744	1.17574e-05	Cytarabine	Other	Antimetabolite
EEF2	-0.394525	1.83823e-06	Cytarabine	Other	Antimetabolite
EXOSC8	-0.319226	0.000143424	Cytarabine	Other	Antimetabolite
IFIT1	0.324439	0.000109806	Cytarabine	Other	Antimetabolite
MTHFD2	-0.403919	9.84869e-07	Cytarabine	Other	Antimetabolite
NABP1	0.354164	2.17762e-05	Cytarabine	Other	Antimetabolite
NOP14	-0.304931	0.000291086	Cytarabine	Other	Antimetabolite
SDAD1	-0.306999	0.00026334	Cytarabine	Other	Antimetabolite
SSR1	-0.362341	1.35504e-05	Cytarabine	Other	Antimetabolite
ALDH18A1	-0.369249	4.86705e-06	5-Fluorouracil	Other	Antimetabolite (DNA & RNA)
ASNS	-0.380074	2.41397e-06	5-Fluorouracil	Other	Antimetabolite (DNA & RNA)
CEBPG	-0.338274	3.16229e-05	5-Fluorouracil	Other	Antimetabolite (DNA & RNA)
CXXC1	-0.300716	0.000237658	5-Fluorouracil	Other	Antimetabolite (DNA & RNA)
EEF2	-0.314958	0.00011411	5-Fluorouracil	Other	Antimetabolite (DNA & RNA)
EXOSC5	-0.327708	5.73002e-05	5-Fluorouracil	Other	Antimetabolite (DNA & RNA)
EXOSC8	-0.362982	7.22121e-06	5-Fluorouracil	Other	Antimetabolite (DNA & RNA)
MTHFD2	-0.403606	4.80828e-07	5-Fluorouracil	Other	Antimetabolite (DNA & RNA)
NABP1	0.344769	2.17061e-05	5-Fluorouracil	Other	Antimetabolite (DNA & RNA)
NOP14	-0.314466	0.000117113	5-Fluorouracil	Other	Antimetabolite (DNA & RNA)
SDAD1	-0.337388	3.32664e-05	5-Fluorouracil	Other	Antimetabolite (DNA & RNA)
SRPRB	-0.317025	0.000102267	5-Fluorouracil	Other	Antimetabolite (DNA & RNA)
SSR1	-0.361608	7.86492e-06	5-Fluorouracil	Other	Antimetabolite (DNA & RNA)
ASNS	-0.30803	0.000250435	YK-4-279	Other	RNA helicase A
EXOSC2	-0.314027	0.000186302	YK-4-279	Other	RNA helicase A
GEMIN4	-0.304997	0.00029017	YK-4-279	Other	RNA helicase A
MTHFD2	-0.369556	8.81885e-06	YK-4-279	Other	RNA helicase A
NABP1	0.300652	0.000357325	YK-4-279	Other	RNA helicase A
NOLC1	-0.329788	8.30656e-05	YK-4-279	Other	RNA helicase A
NOP14	-0.301044	0.000350722	YK-4-279	Other	RNA helicase A
PSAT1	-0.33376	6.72908e-05	YK-4-279	Other	RNA helicase A
NABP1	0.352458	2.75943e-05	BMS-345541	Other	IKK-1, IKK-2
SDAD1	-0.306912	0.000293905	BMS-345541	Other	IKK-1, IKK-2
SSR1	-0.418471	4.40096e-07	BMS-345541	Other	IKK-1, IKK-2
SSR1	-0.4006	1.47597e-06	IAP_5620	Other	IAP
EEF2	-0.346202	3.4137e-05	Pevonedistat	Other	NAE
GEMIN4	-0.314083	0.000185782	Pevonedistat	Other	NAE
EXOC2	-0.30141	0.000381615	Picolinici-acid	Other	Inflammatory related
EXTL2	-0.312457	0.00022471	Picolinici-acid	Other	Inflammatory related
GEMIN4	-0.309867	0.000254891	Picolinici-acid	Other	Inflammatory related
CXXC1	-0.305173	0.000336481	Eg5_9814	Other	KSP11
EXOSC9	-0.320301	0.000161355	Eg5_9814	Other	KSP11
GEMIN4	-0.320804	0.000157347	Eg5_9814	Other	KSP11
CEBPG	-0.303014	0.000353814	TAF1_5496	Other	TAF1
DCP1A	-0.33106	8.78204e-05	TAF1_5496	Other	TAF1
IFIT1	0.31174	0.000232715	TAF1_5496	Other	TAF1
NABP1	0.351941	2.84055e-05	TAF1_5496	Other	TAF1
PREB	-0.34919	3.31122e-05	TAF1_5496	Other	TAF1
SSR1	-0.433977	1.45323e-07	VSP34_8731	Other	VSP34
EEF2	-0.341668	2.43625e-05	Dactinomycin	Other
EEF2	-0.341668	2.43625e-05	Dactinomycin	Other	RNA polymerase
NABP1	0.320486	8.0233e-05	Dactinomycin	Other
NABP1	0.320486	8.0233e-05	Dactinomycin	Other	RNA polymerase
SSR1	-0.351848	1.33111e-05	Dactinomycin	Other
SSR1	-0.351848	1.33111e-05	Dactinomycin	Other	RNA polymerase
DKC1	-0.310019	0.00025303	LY2109761	Other	TGFB1
EXOSC9	-0.300932	0.000390279	LY2109761	Other	TGFB1
GEMIN4	-0.336333	6.65413e-05	LY2109761	Other	TGFB1
NABP1	0.330968	8.82458e-05	LY2109761	Other	TGFB1
NOLC1	-0.35938	1.86313e-05	LY2109761	Other	TGFB1
EXOSC5	-0.331865	7.44301e-05	BPD-00008900	Other
SRPRB	-0.328206	9.02629e-05	BPD-00008900	Other
SSR1	-0.309038	0.00023839	BPD-00008900	Other
ALDH18A1	0.350556	2.32935e-05	Dasatinib	Other, kinases	ABL, SRC, Ephrins, PDGFR, KIT
DCP1A	0.375343	5.29213e-06	Dasatinib	Other, kinases	ABL, SRC, Ephrins, PDGFR, KIT
ALDH18A1	-0.300143	0.000366064	Sorafenib	Other, kinases	PDGFR, KIT, VEGFR, RAF
ASNS	-0.399304	1.34144e-06	Sorafenib	Other, kinases	PDGFR, KIT, VEGFR, RAF
CEBPG	-0.360376	1.52047e-05	Sorafenib	Other, kinases	PDGFR, KIT, VEGFR, RAF
CXXC1	-0.340209	4.75046e-05	Sorafenib	Other, kinases	PDGFR, KIT, VEGFR, RAF
EEF2	-0.362322	1.35653e-05	Sorafenib	Other, kinases	PDGFR, KIT, VEGFR, RAF
EXOSC5	-0.301095	0.000349866	Sorafenib	Other, kinases	PDGFR, KIT, VEGFR, RAF
GEMIN4	-0.307857	0.000252554	Sorafenib	Other, kinases	PDGFR, KIT, VEGFR, RAF
IFIT1	0.445531	4.88292e-08	Sorafenib	Other, kinases	PDGFR, KIT, VEGFR, RAF
LMNA	0.421538	2.89923e-07	Sorafenib	Other, kinases	PDGFR, KIT, VEGFR, RAF
MTHFD2	-0.357594	1.78746e-05	Sorafenib	Other, kinases	PDGFR, KIT, VEGFR, RAF
NABP1	0.461954	1.32954e-08	Sorafenib	Other, kinases	PDGFR, KIT, VEGFR, RAF
NOLC1	-0.326535	9.84932e-05	Sorafenib	Other, kinases	PDGFR, KIT, VEGFR, RAF
NOP14	-0.352376	2.41142e-05	Sorafenib	Other, kinases	PDGFR, KIT, VEGFR, RAF
PREB	-0.340765	4.60849e-05	Sorafenib	Other, kinases	PDGFR, KIT, VEGFR, RAF
PSAT1	-0.338403	5.24106e-05	Sorafenib	Other, kinases	PDGFR, KIT, VEGFR, RAF
SRPRB	-0.343327	4.0035e-05	Sorafenib	Other, kinases	PDGFR, KIT, VEGFR, RAF
SSR1	-0.379044	4.93408e-06	Sorafenib	Other, kinases	PDGFR, KIT, VEGFR, RAF
EXOSC9	-0.301239	0.000384689	AZ960	Other, kinases	JAK2, JAK3
IGFBP1	0.339747	5.54485e-05	AZ960	Other, kinases	JAK2, JAK3
DKC1	-0.301688	0.000376658	AZD1208	Other, kinases	PIM1, PIM2, PIM3
GEMIN4	-0.354429	2.46978e-05	AZD1208	Other, kinases	PIM1, PIM2, PIM3
NOLC1	-0.389499	3.02327e-06	AZD1208	Other, kinases	PIM1, PIM2, PIM3
PREB	-0.347595	3.61669e-05	AZD1208	Other, kinases	PIM1, PIM2, PIM3
NOLC1	-0.313213	0.000216547	Ruxolitinib	Other, kinases	JAK1, JAK2
SSR1	-0.326573	0.000110776	Ruxolitinib	Other, kinases	JAK1, JAK2
EXTL2	-0.365569	1.30112e-05	Entospletinib	Other, kinases	SYK
CXXC1	-0.322666	0.000135202	IRAK4_4710	Other, kinases	IRAK4
CXXC1	-0.309819	0.000255494	JAK1_8709	Other, kinases	JAK1
EXTL2	-0.328992	9.7784e-05	JAK1_8709	Other, kinases	JAK1
GEMIN4	-0.326407	0.000111723	JAK1_8709	Other, kinases	JAK1
NABP1	0.339143	5.72779e-05	JAK1_8709	Other, kinases	JAK1
SSR1	-0.337982	6.09486e-05	JAK1_8709	Other, kinases	JAK1
WFS1	0.342645	4.74192e-05	JAK1_8709	Other, kinases	JAK1
GEMIN4	-0.316442	0.000184686	JAK_8517	Other, kinases	JAK1, JAK2
WFS1	0.301639	0.000377524	Ibrutinib	Other, kinases	BTK
ALDH18A1	-0.324715	0.000108254	AZD5363	Other, kinases	AKT1, AKT2, AKT3, ROCK2
IFIT1	0.34882	2.94849e-05	AZD5363	Other, kinases	AKT1, AKT2, AKT3, ROCK2
SSR1	-0.315777	0.00017069	AZD5363	Other, kinases	AKT1, AKT2, AKT3, ROCK2
EXOSC2	-0.337643	5.46157e-05	GSK2578215A	Other, kinases	LRRK2
GEMIN4	-0.321775	0.000125946	GSK2578215A	Other, kinases	LRRK2
LMNA	0.302285	0.000330551	GSK2578215A	Other, kinases	LRRK2
SSR1	-0.346445	3.36784e-05	GSK2578215A	Other, kinases	LRRK2
WFS1	0.408362	7.28266e-07	GSK2578215A	Other, kinases	LRRK2
ALDH18A1	-0.30269	0.000238357	Nutlin-3a (-)	p53 pathway	MDM2
CXXC1	-0.473341	2.36938e-09	Nutlin-3a (-)	p53 pathway	MDM2
EEF2	-0.379797	2.8916e-06	Nutlin-3a (-)	p53 pathway	MDM2
IFIT1	0.343433	2.67782e-05	Nutlin-3a (-)	p53 pathway	MDM2
SSR1	-0.406904	4.58013e-07	Nutlin-3a (-)	p53 pathway	MDM2
ALDH18A1	-0.336957	5.66787e-05	MIRA-1	p53 pathway	TP53
CXXC1	-0.329765	8.31677e-05	MIRA-1	p53 pathway	TP53
EEF2	-0.31826	0.000150621	MIRA-1	p53 pathway	TP53
EXOSC5	-0.318615	0.00014794	MIRA-1	p53 pathway	TP53
GEMIN4	-0.315558	0.000172578	MIRA-1	p53 pathway	TP53
IFIT1	0.31763	0.000155495	MIRA-1	p53 pathway	TP53
LMNA	0.389536	2.54086e-06	MIRA-1	p53 pathway	TP53
NABP1	0.347037	3.25826e-05	MIRA-1	p53 pathway	TP53
NOLC1	-0.316697	0.000162985	MIRA-1	p53 pathway	TP53
SSR1	-0.378293	5.16974e-06	MIRA-1	p53 pathway	TP53
WFS1	0.310354	0.000223473	MIRA-1	p53 pathway	TP53
EXOSC5	-0.331281	5.31085e-05	MK-2206	PI3K/MTOR signaling	AKT1, AKT2
EXOSC5	-0.315599	0.000154048	Pictilisib	PI3K/MTOR signaling	PI3K (class 1)
IGFBP1	0.334959	7.62117e-05	Rapamycin	PI3K/MTOR signaling	MTORC1
IGFBP1	0.352511	1.37082e-05	Taselisib	PI3K/MTOR signaling	PI3K (beta sparing)
CXXC1	-0.503846	1.88029e-05	OSI-027	PI3K/MTOR signaling	MTORC1, MTORC2
EEF2	-0.503715	1.89125e-05	OSI-027	PI3K/MTOR signaling	MTORC1, MTORC2
EXOSC5	-0.308392	0.0124427	OSI-027	PI3K/MTOR signaling	MTORC1, MTORC2
EXTL2	-0.338811	0.00576693	OSI-027	PI3K/MTOR signaling	MTORC1, MTORC2
LMNA	0.314554	0.0107123	OSI-027	PI3K/MTOR signaling	MTORC1, MTORC2
PREB	-0.316521	0.0102059	OSI-027	PI3K/MTOR signaling	MTORC1, MTORC2
PSAT1	-0.321984	0.00890689	OSI-027	PI3K/MTOR signaling	MTORC1, MTORC2
SDAD1	-0.415253	0.000582486	OSI-027	PI3K/MTOR signaling	MTORC1, MTORC2
SRPRB	-0.305376	0.0133742	OSI-027	PI3K/MTOR signaling	MTORC1, MTORC2
SSR1	-0.43986	0.000246148	OSI-027	PI3K/MTOR signaling	MTORC1, MTORC2
PSAT1	-0.319824	0.000139135	Buparlisib	PI3K/MTOR signaling	PI3Kalpha, PI3Kdelta, PI3Kbeta, PI3Kgamma
WFS1	0.370415	8.37357e-06	Buparlisib	PI3K/MTOR signaling	PI3Kalpha, PI3Kdelta, PI3Kbeta, PI3Kgamma
ASNS	-0.310266	0.00022445	Afuresertib	PI3K/MTOR signaling	AKT1, AKT2, AKT3
IGFBP1	0.329937	8.24146e-05	Afuresertib	PI3K/MTOR signaling	AKT1, AKT2, AKT3
PSAT1	-0.327464	9.38356e-05	Afuresertib	PI3K/MTOR signaling	AKT1, AKT2, AKT3
ALDH18A1	-0.308544	0.000244232	Ipatasertib	PI3K/MTOR signaling	AKT1, AKT, AKT3
ASNS	-0.302938	0.000320371	Ipatasertib	PI3K/MTOR signaling	AKT1, AKT, AKT3
EXOSC8	-0.304035	0.000303933	Ipatasertib	PI3K/MTOR signaling	AKT1, AKT, AKT3
PSAT1	-0.308245	0.000247823	Ipatasertib	PI3K/MTOR signaling	AKT1, AKT, AKT3
WFS1	0.334153	8.46399e-05	AMG-319	PI3K/MTOR signaling	PI3K (beta sparing)
IGFBP1	0.346625	4.08136e-05	LJI308	PI3K/MTOR signaling	RSK2, RSK1, RSK3
WFS1	0.32045	0.000160154	LJI308	PI3K/MTOR signaling	RSK2, RSK1, RSK3
EXTL2	-0.317862	0.000182135	AT13148	PI3K/MTOR signaling	AKT1
PSAT1	-0.353907	2.72894e-05	AT13148	PI3K/MTOR signaling	AKT1
EEF2	-0.366271	0.0133406	AZD8055	PI3K/MTOR signaling	MTORC1, MTORC2
EXTL2	-0.321212	0.031437	AZD8055	PI3K/MTOR signaling	MTORC1, MTORC2
EXOSC2	-0.300248	0.000383118	Bortezomib	Protein stability and degradation	Proteasome
EEF2	-0.300669	0.000238222	Luminespib	Protein stability and degradation	HSP90
MTHFD2	-0.307322	0.000169897	Luminespib	Protein stability and degradation	HSP90
CEBPG	-0.345976	3.95375e-05	ML323	Protein stability and degradation	USP1, UAF1
CXXC1	-0.339874	5.50719e-05	ML323	Protein stability and degradation	USP1, UAF1
IFIT1	0.316462	0.000184507	ML323	Protein stability and degradation	USP1, UAF1
NABP1	0.352931	2.6871e-05	ML323	Protein stability and degradation	USP1, UAF1
PSAT1	-0.335104	7.10196e-05	ML323	Protein stability and degradation	USP1, UAF1
EEF2	-0.356096	1.94897e-05	P22077	Protein stability and degradation	USP7, USP47
LMNA	0.363321	1.27902e-05	P22077	Protein stability and degradation	USP7, USP47
CEBPG	-0.320024	0.000137721	PD173074	RTK signaling	FGFR1, FGFR2, FGFR3
CXXC1	-0.314723	0.000179946	PD173074	RTK signaling	FGFR1, FGFR2, FGFR3
GEMIN4	-0.312198	0.000204032	PD173074	RTK signaling	FGFR1, FGFR2, FGFR3
IFIT1	0.397904	1.4719e-06	PD173074	RTK signaling	FGFR1, FGFR2, FGFR3
LMNA	0.30124	0.000347463	PD173074	RTK signaling	FGFR1, FGFR2, FGFR3
NABP1	0.362509	1.34171e-05	PD173074	RTK signaling	FGFR1, FGFR2, FGFR3
SSR1	-0.405922	8.60082e-07	PD173074	RTK signaling	FGFR1, FGFR2, FGFR3
WFS1	0.340615	4.64627e-05	PD173074	RTK signaling	FGFR1, FGFR2, FGFR3
ALDH18A1	-0.337879	6.12828e-05	Crizotinib	RTK signaling	MET, ALK, ROS1
DCP1A	-0.350902	3.01038e-05	Crizotinib	RTK signaling	MET, ALK, ROS1
DKC1	-0.336918	6.45029e-05	Crizotinib	RTK signaling	MET, ALK, ROS1
EEF2	-0.303229	0.000350241	Crizotinib	RTK signaling	MET, ALK, ROS1
NOLC1	-0.303687	0.00034272	Crizotinib	RTK signaling	MET, ALK, ROS1
IFIT1	0.377583	3.61628e-06	AZD4547	RTK signaling	FGFR1, FGFR2, FGFR3
IGFBP1	0.305776	0.000279438	Cediranib	RTK signaling	VEGFR, FLT1, FLT2, FLT3, FLT4, KIT, PDGFRB
WFS1	0.370643	8.25862e-06	Savolitinib	RTK signaling	MET
EEF2	-0.309403	0.00029023	Foretinib	RTK signaling	MET, KDR, TIE2, VEGFR3/FLT4, RON, PDGFR, FGFR1, EGFR
IFIT1	0.307327	0.000320305	Foretinib	RTK signaling	MET, KDR, TIE2, VEGFR3/FLT4, RON, PDGFR, FGFR1, EGFR
NABP1	0.324869	0.000136058	Foretinib	RTK signaling	MET, KDR, TIE2, VEGFR3/FLT4, RON, PDGFR, FGFR1, EGFR
DCP1A	0.373386	0.0115247	SB505124	RTK signaling	TGFBR1, ACVR1B, ACVR1C
EXOSC9	0.300395	0.0449653	SB505124	RTK signaling	TGFBR1, ACVR1B, ACVR1C
NABP1	0.314374	0.000204547	Zoledronate	Unclassified
SSR1	-0.31413	0.000207015	Zoledronate	Unclassified
ADD1	0.30636	0.000301765	Acetalax	Unclassified
EXTL2	-0.351595	2.89613e-05	Podophyllotoxin bromide	Unclassified
IGFBP1	0.327529	0.000105461	Podophyllotoxin bromide	Unclassified
NABP1	0.323242	0.000131313	Podophyllotoxin bromide	Unclassified
EEF2	-0.417106	4.83938e-07	Elephantin	Unclassified
SSR1	-0.376978	6.58211e-06	Elephantin	Unclassified
GEMIN4	-0.310175	0.000251123	Sinularin	Unclassified
SDAD1	-0.309248	0.000262646	Sinularin	Unclassified
EXOC2	-0.319174	0.000161194	XAV939	WNT signaling	TNKS1, TNKS2
WFS1	0.377549	6.3572e-06	IWP-2	WNT signaling	PORCN
NABP1	0.405058	4.33452e-07	LGK974	WNT signaling	PORCN
EXOSC5	-0.369193	1.05079e-05	MN-64	WNT signaling	TNKS1, TNKS2
ADD1	0.306719	0.0404305	SB216763	WNT signaling	GSK3A, GSK3B
SRPRB	-0.312516	0.0366089	SB216763	WNT signaling	GSK3A, GSK3B
